# Supplementary material
Source: MDPI journal article supplement (https://www.mdpi.com/2218-2004/10/1/17)
Supplement: s1 [file s1]

# Supplementary data

**Table S1.** Energy (in cm<sup>-1</sup>) for the fine-structure levels of Ge-like Te<sup>20+</sup> ion.

| Index | Configuration                    | ( <i>LS</i> ) <sup><i>p</i></sup>        | <i>J</i> | This work | Ref [10] | Ref [12] |
|-------|----------------------------------|------------------------------------------|----------|-----------|----------|----------|
| 1     | 4s <sup>2</sup> 4p̄ <sup>2</sup> | <sup>3</sup> P <sub>0</sub> <sup>e</sup> | 0        | 0         | 0        | 0        |
| 2     | 4s <sup>2</sup> 4p̄4p            | <sup>3</sup> P <sub>1</sub> <sup>e</sup> | 1        | 87293     | 87506    | 87445    |
| 3     | 4s <sup>2</sup> 4p̄4p            | <sup>3</sup> P <sub>2</sub> <sup>e</sup> | 2        | 107830    | 106473   | 106247   |
| 4     | 4s <sup>2</sup> 4p <sup>2</sup>  | <sup>1</sup> D <sub>2</sub> <sup>e</sup> | 2        | 211634    | 208907   | 208276   |
| 5     | 4s <sup>2</sup> 4p <sup>2</sup>  | <sup>1</sup> S <sub>0</sub> <sup>e</sup> | 0        | 261899    | 255756   | 254124   |
| 6     | 4s4p̄ <sup>2</sup> 4p            | <sup>5</sup> S <sub>2</sub> <sup>o</sup> | 2        | 425089    | 441507   | 439289   |
| 7     | 4s4p̄ <sup>2</sup> 4p            | <sup>3</sup> D <sub>1</sub> <sup>o</sup> | 1        | 504886    | 513288   | 511761   |
| 8     | 4s4p <sup>2</sup> 4p̄            | <sup>3</sup> D <sub>2</sub> <sup>o</sup> | 2        | 527812    | 540065   | 537328   |
| 9     | 4s4p <sup>2</sup> 4p̄            | <sup>3</sup> D <sub>3</sub> <sup>o</sup> | 3        | 558720    | 569415   | 566674   |
| 10    | 4s4p <sup>2</sup> 4p̄            | <sup>3</sup> P <sub>0</sub> <sup>o</sup> | 0        | 600408    | 609588   | 607038   |
| 11    | 4s4p <sup>2</sup> 4p̄            | <sup>3</sup> P <sub>1</sub> <sup>o</sup> | 1        | 614683    | 621766   | 620119   |
| 12    | 4s4p <sup>2</sup> 4p̄            | <sup>3</sup> P <sub>2</sub> <sup>o</sup> | 2        | 622611    | 628567   | 626404   |
| 13    | 4s4p <sup>2</sup> 4p̄            | <sup>3</sup> S <sub>1</sub> <sup>o</sup> | 1        | 682206    | 671343   | 676893   |
| 14    | 4s4p <sup>2</sup> 4p̄            | <sup>1</sup> D <sub>2</sub> <sup>o</sup> | 2        | 698876    | 707408   | 702695   |
| 15    | 4s <sup>2</sup> 4p̄4d            | <sup>3</sup> F <sub>2</sub> <sup>o</sup> | 2        | 739079    | 731944   | 739354   |
| 16    | 4s <sup>2</sup> 4p̄4d            | <sup>3</sup> F <sub>3</sub> <sup>o</sup> | 3        | 775764    | 781404   | 776760   |
| 17    | 4s4p <sup>3</sup>                | <sup>1</sup> P <sub>1</sub> <sup>o</sup> | 1        | 791113    | 785953   | 787912   |
| 18    | 4s <sup>2</sup> 4p̄4d            | <sup>3</sup> P <sub>2</sub> <sup>o</sup> | 2        | 809259    | 810864   | 804520   |
| 19    | 4s <sup>2</sup> 4p̄4d            | <sup>3</sup> P <sub>1</sub> <sup>o</sup> | 1        | 820008    | 813074   | 814273   |
| 20    | 4s <sup>2</sup> 4p4d             | <sup>3</sup> F <sub>4</sub> <sup>o</sup> | 4        | 852182    | 858164   | 852877   |
| 21    | 4s <sup>2</sup> 4p4d             | <sup>1</sup> D <sub>2</sub> <sup>o</sup> | 2        | 889263    | 887452   | 882183   |
| 22    | 4s <sup>2</sup> 4p4d̄            | <sup>3</sup> P <sub>0</sub> <sup>o</sup> | 0        | 896285    | 894333   | 891880   |
| 23    | 4s <sup>2</sup> 4p4d             | <sup>1</sup> F <sub>3</sub> <sup>o</sup> | 3        | 905989    | 902735   | 900277   |
| 24    | 4s <sup>2</sup> 4p̄4d̄           | <sup>3</sup> D <sub>1</sub> <sup>o</sup> | 1        | 906609    | 905764   | 901133   |
| 25    | 4s <sup>2</sup> 4p̄4d            | <sup>3</sup> D <sub>2</sub> <sup>o</sup> | 2        | 921138    | 920588   | 914516   |
| 26    | 4s <sup>2</sup> 4p4d̄            | <sup>3</sup> D <sub>3</sub> <sup>o</sup> | 3        | 969924    | 964355   | 962484   |
| 27    | 4s <sup>2</sup> 4p4d             | <sup>1</sup> P <sub>1</sub> <sup>o</sup> | 1        | 984377    | 982530   | 976524   |

**Table S2.** Energy (in cm<sup>-1</sup>) for the fine-structure levels of Ge-like Sb<sup>19+</sup> ion.

| Index | Configuration                    | ( <i>LS</i> ) <sup><i>p</i></sup>        | J | This work | Ref [12] |
|-------|----------------------------------|------------------------------------------|---|-----------|----------|
| 1     | 4s <sup>2</sup> 4p̄ <sup>2</sup> | <sup>3</sup> P <sub>0</sub> <sup>e</sup> | 0 | 0         | 0        |
| 2     | 4s <sup>2</sup> 4p̄4p            | <sup>3</sup> P <sub>1</sub> <sup>e</sup> | 1 | 76431     | 76588    |
| 3     | 4s <sup>2</sup> 4p̄4p            | <sup>3</sup> P <sub>2</sub> <sup>e</sup> | 2 | 96068     | 94554    |
| 4     | 4s <sup>2</sup> 4p <sup>2</sup>  | <sup>1</sup> D <sub>2</sub> <sup>e</sup> | 2 | 188470    | 185230   |
| 5     | 4s <sup>2</sup> 4p <sup>2</sup>  | <sup>1</sup> S <sub>0</sub> <sup>e</sup> | 0 | 237317    | 229687   |
| 6     | 4s4p̄ <sup>2</sup> 4p            | <sup>5</sup> S <sub>2</sub> <sup>o</sup> | 2 | 396011    | 410310   |
| 7     | 4s4p̄ <sup>2</sup> 4p            | <sup>3</sup> D <sub>1</sub> <sup>o</sup> | 1 | 473903    | 480866   |
| 8     | 4s4p <sup>2</sup> 4p̄            | <sup>3</sup> D <sub>2</sub> <sup>o</sup> | 2 | 491684    | 500908   |
| 9     | 4s4p <sup>2</sup> 4p̄            | <sup>3</sup> D <sub>3</sub> <sup>o</sup> | 3 | 519790    | 527676   |
| 10    | 4s4p <sup>2</sup> 4p̄            | <sup>3</sup> P <sub>0</sub> <sup>o</sup> | 0 | 560070    | 566695   |
| 11    | 4s4p <sup>2</sup> 4p̄            | <sup>3</sup> P <sub>1</sub> <sup>o</sup> | 1 | 572796    | 578377   |
| 12    | 4s4p <sup>3</sup>                | <sup>3</sup> P <sub>2</sub> <sup>o</sup> | 2 | 580967    | 585009   |
| 13    | 4s4p <sup>2</sup> 4p̄            | <sup>3</sup> S <sub>1</sub> <sup>o</sup> | 1 | 641233    | 635895   |
| 14    | 4s4p <sup>2</sup> 4p̄            | <sup>1</sup> D <sub>2</sub> <sup>o</sup> | 2 | 650878    | 654195   |
| 15    | 4s <sup>2</sup> 4p̄4d̄           | <sup>3</sup> F <sub>2</sub> <sup>o</sup> | 2 | 698334    | 698793   |
| 16    | 4s <sup>2</sup> 4p̄4d̄           | <sup>3</sup> F <sub>3</sub> <sup>o</sup> | 3 | 732470    | 733506   |
| 17    | 4s4p <sup>3</sup>                | <sup>1</sup> P <sub>1</sub> <sup>o</sup> | 1 | 739316    | 735581   |
| 18    | 4s <sup>2</sup> 4p4d̄            | <sup>3</sup> P <sub>2</sub> <sup>o</sup> | 2 | 766310    | 761596   |
| 19    | 4s <sup>2</sup> 4p̄4d            | <sup>3</sup> P <sub>1</sub> <sup>o</sup> | 1 | 777096    | 771897   |
| 20    | 4s <sup>2</sup> 4p4d             | <sup>3</sup> F <sub>4</sub> <sup>o</sup> | 4 | 799542    | 800276   |
| 21    | 4s <sup>2</sup> 4p4d             | <sup>1</sup> D <sub>2</sub> <sup>o</sup> | 2 | 837397    | 830413   |
| 22    | 4s <sup>2</sup> 4p4d̄            | <sup>3</sup> P <sub>0</sub> <sup>o</sup> | 0 | 844043    | 839767   |
| 23    | 4s <sup>2</sup> 4p̄4d̄           | <sup>3</sup> D <sub>1</sub> <sup>o</sup> | 1 | 853492    | 848189   |
| 24    | 4s <sup>2</sup> 4p4d             | <sup>1</sup> F <sub>3</sub> <sup>o</sup> | 3 | 853883    | 848212   |
| 25    | 4s <sup>2</sup> 4p̄4d            | <sup>3</sup> D <sub>2</sub> <sup>o</sup> | 2 | 866410    | 860016   |
| 26    | 4s <sup>2</sup> 4p4d̄            | <sup>3</sup> D <sub>3</sub> <sup>o</sup> | 3 | 914476    | 907206   |
| 27    | 4s <sup>2</sup> 4p4d             | <sup>1</sup> P <sub>1</sub> <sup>o</sup> | 1 | 927777    | 920133   |

**Table S3.** Energy (in cm<sup>-1</sup>) for the fine-structure levels of Ge-like Sn<sup>18+</sup> ion.

| Index | Configuration            | $(LS)^p$  | $J$ | This work | Ref [12] | Ref [11] |
|-------|--------------------------|-----------|-----|-----------|----------|----------|
| 1     | $4s^2 4\bar{p}^2$        | $^3P_0^e$ | 0   | 0         | 0        | 0        |
| 2     | $4s^2 4\bar{p} 4p$       | $^3P_1^e$ | 1   | 66576     | 66736    | 67488    |
| 3     | $4s^2 4\bar{p} 4p$       | $^3P_2^e$ | 2   | 85297     | 83851    | 82685    |
| 4     | $4s^2 4p^2$              | $^1D_2^e$ | 2   | 167323    | 164188   | 165995   |
| 5     | $4s^2 4p^2$              | $^1S_0^e$ | 0   | 214739    | 207242   | 203035   |
| 6     | $4s 4\bar{p}^2 4p$       | $^5S_2^o$ | 2   | 368079    | 382410   | 375664   |
| 7     | $4s 4\bar{p}^2 4p$       | $^3D_1^o$ | 1   | 444087    | 451084   | 460318   |
| 8     | $4s 4p^2 4\bar{p}$       | $^3D_2^o$ | 2   | 457630    | 466522   | 481353   |
| 9     | $4s 4p^2 4\bar{p}$       | $^3D_3^o$ | 3   | 482945    | 490706   | 508270   |
| 10    | $4s 4p^2 4\bar{p}$       | $^3P_0^o$ | 0   | 521826    | 528391   | 528117   |
| 11    | $4s 4p^2 4\bar{p}$       | $^3P_1^o$ | 1   | 533066    | 538726   | 543194   |
| 12    | $4s 4p^2 4\bar{p}$       | $^3P_2^o$ | 2   | 541198    | 545459   | 561141   |
| 13    | $4s 4p^2 4\bar{p}$       | $^3S_1^o$ | 1   | 602252    | 596865   | 588671   |
| 14    | $4s 4p^2 4\bar{p}$       | $^1D_2^o$ | 2   | 605330    | 608104   | 638917   |
| 15    | $4s^2 4\bar{p} 4\bar{d}$ | $^3F_2^o$ | 2   | 659261    | 659842   | 654625   |
| 16    | $4s 4p^3$                | $^1P_1^o$ | 1   | 689885    | 685835   | 680368   |
| 17    | $4s^2 4\bar{p} 4\bar{d}$ | $^3F_3^o$ | 3   | 690459    | 691487   | 693918   |
| 18    | $4s^2 4p 4d$             | $^1D_2^o$ | 2   | 724592    | 719862   | 700351   |
| 19    | $4s^2 4\bar{p} 4d$       | $^3P_1^o$ | 1   | 735662    | 730732   | 712165   |
| 20    | $4s^2 4p 4d$             | $^3F_4^o$ | 4   | 749094    | 749809   | 753990   |
| 21    | $4s^2 4p 4d$             | $^3P_2^o$ | 2   | 787503    | 780579   | 763809   |
| 22    | $4s^2 4p 4\bar{d}$       | $^3P_0^o$ | 0   | 793756    | 789564   | 780721   |
| 23    | $4s^2 4\bar{p} 4\bar{d}$ | $^3D_1^o$ | 1   | 802449    | 797263   | 782786   |
| 24    | $4s^2 4p 4d$             | $^1F_3^o$ | 3   | 803689    | 798022   | 785025   |
| 25    | $4s^2 4\bar{p} 4d$       | $^3D_2^o$ | 2   | 813920    | 807696   | 786908   |
| 26    | $4s^2 4p 4\bar{d}$       | $^3D_3^o$ | 3   | 861113    | 853966   | 846787   |
| 27    | $4s^2 4p 4d$             | $^1P_1^o$ | 1   | 873349    | 865854   | 844703   |

**Table S4.** Energy (in cm<sup>-1</sup>) for the fine-structure levels of Ge-like In<sup>17+</sup> ion.

| Index | Configuration                      | ( <i>LS</i> ) <sup><i>p</i></sup>        | J | This work | Ref [12] |
|-------|------------------------------------|------------------------------------------|---|-----------|----------|
| 1     | 4s <sup>2</sup> 4p <sup>2</sup>    | <sup>3</sup> P <sub>0</sub> <sup>e</sup> | 0 | 0         | 0        |
| 2     | 4s <sup>2</sup> 4p <sup>2</sup> 4p | <sup>3</sup> P <sub>1</sub> <sup>e</sup> | 1 | 57668     | 57816    |
| 3     | 4s <sup>2</sup> 4p <sup>2</sup> 4p | <sup>3</sup> P <sub>2</sub> <sup>e</sup> | 2 | 75454     | 74071    |
| 4     | 4s <sup>2</sup> 4p <sup>2</sup>    | <sup>1</sup> D <sub>2</sub> <sup>e</sup> | 2 | 148074    | 145021   |
| 5     | 4s <sup>2</sup> 4p <sup>2</sup>    | <sup>1</sup> S <sub>0</sub> <sup>e</sup> | 0 | 194043    | 186668   |
| 6     | 4s4p <sup>2</sup> 4p               | <sup>5</sup> S <sub>2</sub> <sup>o</sup> | 2 | 341270    | 355635   |
| 7     | 4s4p <sup>2</sup> 4p               | <sup>3</sup> D <sub>1</sub> <sup>o</sup> | 1 | 415394    | 422439   |
| 8     | 4s4p <sup>2</sup> 4p               | <sup>3</sup> D <sub>2</sub> <sup>o</sup> | 2 | 425505    | 434106   |
| 9     | 4s4p <sup>2</sup> 4p               | <sup>3</sup> D <sub>3</sub> <sup>o</sup> | 3 | 448068    | 455727   |
| 10    | 4s4p <sup>2</sup> 4p               | <sup>3</sup> P <sub>0</sub> <sup>o</sup> | 0 | 485557    | 492081   |
| 11    | 4s4p <sup>2</sup> 4p               | <sup>3</sup> P <sub>1</sub> <sup>o</sup> | 1 | 495385    | 501130   |
| 12    | 4s4p <sup>3</sup>                  | <sup>3</sup> P <sub>2</sub> <sup>o</sup> | 2 | 503241    | 507752   |
| 13    | 4s4p <sup>2</sup> 4p               | <sup>1</sup> D <sub>2</sub> <sup>o</sup> | 2 | 562303    | 564587   |
| 14    | 4s4p <sup>2</sup> 4p               | <sup>3</sup> S <sub>1</sub> <sup>o</sup> | 1 | 565132    | 559739   |
| 15    | 4s <sup>2</sup> 4p <sup>2</sup> 4d | <sup>3</sup> F <sub>2</sub> <sup>o</sup> | 2 | 621494    | 622166   |
| 16    | 4s4p <sup>3</sup>                  | <sup>1</sup> P <sub>1</sub> <sup>o</sup> | 1 | 642945    | 638736   |
| 17    | 4s <sup>2</sup> 4p <sup>2</sup> 4d | <sup>3</sup> F <sub>3</sub> <sup>o</sup> | 3 | 649655    | 650667   |
| 18    | 4s <sup>2</sup> 4p <sup>2</sup> 4d | <sup>3</sup> P <sub>2</sub> <sup>o</sup> | 2 | 684012    | 679260   |
| 19    | 4s <sup>2</sup> 4p <sup>2</sup> 4d | <sup>3</sup> P <sub>1</sub> <sup>o</sup> | 1 | 695339    | 690572   |
| 20    | 4s <sup>2</sup> 4p <sup>2</sup> 4d | <sup>3</sup> F <sub>4</sub> <sup>o</sup> | 4 | 700696    | 701384   |
| 21    | 4s <sup>2</sup> 4p <sup>2</sup> 4d | <sup>1</sup> D <sub>2</sub> <sup>o</sup> | 2 | 739452    | 732586   |
| 22    | 4s <sup>2</sup> 4p <sup>2</sup> 4d | <sup>3</sup> P <sub>0</sub> <sup>o</sup> | 0 | 745292    | 741173   |
| 23    | 4s <sup>2</sup> 4p <sup>2</sup> 4d | <sup>3</sup> D <sub>1</sub> <sup>o</sup> | 1 | 753327    | 748238   |
| 24    | 4s <sup>2</sup> 4p <sup>2</sup> 4d | <sup>1</sup> F <sub>3</sub> <sup>o</sup> | 3 | 755273    | 749603   |
| 25    | 4s <sup>2</sup> 4p <sup>2</sup> 4d | <sup>3</sup> D <sub>2</sub> <sup>o</sup> | 2 | 763508    | 757434   |
| 26    | 4s <sup>2</sup> 4p <sup>2</sup> 4d | <sup>3</sup> D <sub>3</sub> <sup>o</sup> | 3 | 809679    | 802639   |
| 27    | 4s <sup>2</sup> 4p <sup>2</sup> 4d | <sup>1</sup> P <sub>1</sub> <sup>o</sup> | 1 | 820938    | 813569   |

**Table S5.** Energy (in cm<sup>-1</sup>) for the fine-structure levels of Ge-like Cd<sup>16+</sup> ion.

| Index | Configuration                      | $(LS)^p$                                 | $J$ | This work | Ref [9] | Ref [13] |
|-------|------------------------------------|------------------------------------------|-----|-----------|---------|----------|
| 1     | 4s <sup>2</sup> 4p <sup>2</sup>    | <sup>3</sup> P <sub>0</sub> <sup>e</sup> | 0   | 0         | 0       |          |
| 2     | 4s <sup>2</sup> 4p <sup>2</sup> 4p | <sup>3</sup> P <sub>1</sub> <sup>e</sup> | 1   | 49648     | 50622   | 50279    |
| 3     | 4s <sup>2</sup> 4p <sup>2</sup> 4p | <sup>3</sup> P <sub>2</sub> <sup>e</sup> | 2   | 66481     | 65490   | 65493    |
| 4     | 4s <sup>2</sup> 4p <sup>2</sup>    | <sup>1</sup> D <sub>2</sub> <sup>e</sup> | 2   | 130610    | 128378  | 128382   |
| 5     | 4s <sup>2</sup> 4p <sup>2</sup>    | <sup>1</sup> S <sub>0</sub> <sup>e</sup> | 0   | 175112    |         | 168304   |
| 6     | 4s4p <sup>2</sup> 4p               | <sup>5</sup> S <sub>2</sub> <sup>o</sup> | 2   | 315557    |         | 333415   |
| 7     | 4s4p <sup>2</sup> 4p               | <sup>3</sup> D <sub>1</sub> <sup>o</sup> | 1   | 387772    | 396359  | 396072   |
| 8     | 4s4p <sup>2</sup> 4p               | <sup>3</sup> D <sub>2</sub> <sup>o</sup> | 2   | 395154    | 406314  | 405595   |
| 9     | 4s4p <sup>2</sup> 4p               | <sup>3</sup> D <sub>3</sub> <sup>o</sup> | 3   | 415039    | 425385  | 424760   |
| 10    | 4s4p <sup>2</sup> 4p               | <sup>3</sup> P <sub>0</sub> <sup>o</sup> | 0   | 451139    |         | 458921   |
| 11    | 4s4p <sup>2</sup> 4p               | <sup>3</sup> P <sub>1</sub> <sup>o</sup> | 1   | 459639    |         | 466466   |
| 12    | 4s4p <sup>2</sup> 4p               | <sup>3</sup> P <sub>2</sub> <sup>o</sup> | 2   | 467031    | 472709  | 472562   |
| 13    | 4s4p <sup>2</sup> 4p               | <sup>1</sup> D <sub>2</sub> <sup>o</sup> | 2   | 521716    | 517151  | 518029   |
| 14    | 4s4p <sup>2</sup> 4p               | <sup>3</sup> S <sub>1</sub> <sup>o</sup> | 1   | 529732    | 524051  | 523932   |
| 15    | 4s <sup>2</sup> 4p <sup>2</sup> 4d | <sup>3</sup> F <sub>2</sub> <sup>o</sup> | 2   | 584816    |         | 585538   |
| 16    | 4s4p <sup>3</sup>                  | <sup>1</sup> P <sub>1</sub> <sup>o</sup> | 1   | 598429    | 588233  | 589147   |
| 17    | 4s <sup>2</sup> 4p <sup>2</sup> 4d | <sup>3</sup> F <sub>3</sub> <sup>o</sup> | 3   | 609979    |         | 611274   |
| 18    | 4s <sup>2</sup> 4p <sup>2</sup> 4d | <sup>3</sup> P <sub>2</sub> <sup>o</sup> | 2   | 644476    |         | 635724   |
| 19    | 4s <sup>2</sup> 4p <sup>2</sup> 4d | <sup>3</sup> F <sub>4</sub> <sup>o</sup> | 4   | 654206    |         |          |
| 20    | 4s <sup>2</sup> 4p <sup>2</sup> 4d | <sup>3</sup> P <sub>1</sub> <sup>o</sup> | 1   | 655944    |         | 646362   |
| 21    | 4s <sup>2</sup> 4p <sup>2</sup> 4d | <sup>1</sup> D <sub>2</sub> <sup>o</sup> | 2   | 693116    |         | 682472   |
| 22    | 4s <sup>2</sup> 4p <sup>2</sup> 4d | <sup>3</sup> P <sub>0</sub> <sup>o</sup> | 0   | 698520    |         | 691539   |
| 23    | 4s <sup>2</sup> 4p <sup>2</sup> 4d | <sup>3</sup> D <sub>1</sub> <sup>o</sup> | 1   | 705980    |         | 697289   |
| 24    | 4s <sup>2</sup> 4p <sup>2</sup> 4d | <sup>1</sup> F <sub>3</sub> <sup>o</sup> | 3   | 708499    |         | 698208   |
| 25    | 4s <sup>2</sup> 4p <sup>2</sup> 4d | <sup>3</sup> D <sub>2</sub> <sup>o</sup> | 2   | 715017    |         | 705021   |
| 26    | 4s <sup>2</sup> 4p <sup>2</sup> 4d | <sup>3</sup> D <sub>3</sub> <sup>o</sup> | 3   | 760016    |         | 746953   |
| 27    | 4s <sup>2</sup> 4p <sup>2</sup> 4d | <sup>1</sup> P <sub>1</sub> <sup>o</sup> | 1   | 770387    |         | 758112   |

**Table S6.** Transition wavelengths (in Å) and oscillator strengths for the transition between the energy levels of Ge-like Te<sup>20+</sup> ion.

| Lower level                                                              | Upper level                                                   | Transition wavelength |          |          | Oscillator strength |          |          |
|--------------------------------------------------------------------------|---------------------------------------------------------------|-----------------------|----------|----------|---------------------|----------|----------|
|                                                                          |                                                               | This work             | Ref [10] | Ref [12] | This work           | Ref [10] | Ref [12] |
| 4s <sup>2</sup> 4p <sup>2</sup> <sup>3</sup> P <sub>0</sub> <sup>e</sup> | 4s4p <sup>2</sup> 4p <sup>3</sup> D <sub>1</sub> <sup>o</sup> | 198.58                | 194.82   | 195.40   | 3.969E-1            | 3.738E-1 | 3.610E-1 |
|                                                                          | 4s4p <sup>2</sup> 4p <sup>3</sup> P <sub>1</sub> <sup>o</sup> | 163.11                | 160.83   | 161.26   | 5.814E-2            | 5.526E-2 | 5.669E-2 |
|                                                                          | 4s4p <sup>2</sup> 4p <sup>3</sup> S <sub>1</sub> <sup>o</sup> | 146.97                | 148.96   | 147.73   | 2.737E-1            | 1.756E-1 | 2.108E-1 |
|                                                                          | 4s4p <sup>3</sup> <sup>1</sup> P <sub>1</sub> <sup>o</sup>    | 126.40                | 127.23   | 126.92   | 1.975E-1            | 3.320E-2 | 1.462E-1 |
|                                                                          | 4s <sup>2</sup> 4p4d <sup>3</sup> P <sub>1</sub> <sup>o</sup> | 121.95                | 122.99   | 122.81   | 1.630E+01           | 1.605    | 1.711    |
|                                                                          | 4s <sup>2</sup> 4p4d <sup>3</sup> D <sub>1</sub> <sup>o</sup> | 110.59                | 110.40   | 110.97   | 9.430E-3            | 3.464E-3 | 4.372E-3 |
|                                                                          | 4s <sup>2</sup> 4p4d <sup>1</sup> P <sub>1</sub> <sup>o</sup> | 101.85                | 101.78   | 102.40   | 7.800E-3            | 8.163E-3 | 1.016E-2 |
| 4s <sup>2</sup> 4p4p <sup>3</sup> P <sub>1</sub> <sup>e</sup>            | 4s4p <sup>2</sup> 4p <sup>5</sup> S <sub>2</sub> <sup>o</sup> | 296.82                | 282.48   | 284.22   | 2.623E-2            | 2.650E-2 | 2.669E-2 |
|                                                                          | 4s4p <sup>2</sup> 4p <sup>3</sup> D <sub>1</sub> <sup>o</sup> | 240.10                | 234.86   | 235.67   | 6.110E-4            | 1.066E-3 | 9.233E-4 |
|                                                                          | 4s4p <sup>2</sup> 4p <sup>3</sup> D <sub>2</sub> <sup>o</sup> | 227.60                | 220.96   | 222.28   | 1.140E-1            | 1.022E-1 | 9.880E-2 |
|                                                                          | 4s4p <sup>2</sup> 4p <sup>3</sup> P <sub>0</sub> <sup>o</sup> | 195.40                | 191.54   | 192.46   | 4.903E-2            | 4.415E-2 | 4.520E-2 |
|                                                                          | 4s4p <sup>2</sup> 4p <sup>3</sup> P <sub>1</sub> <sup>o</sup> | 190.11                | 187.17   | 187.73   | 1.532E-1            | 1.575E-1 | 1.458E-1 |
|                                                                          | 4s4p <sup>3</sup> <sup>3</sup> P <sub>2</sub> <sup>o</sup>    | 186.80                | 184.82   | 185.54   | 2.360E-3            | 2.560E-3 | 4.49E-3  |
|                                                                          | 4s4p <sup>2</sup> 4p <sup>3</sup> S <sub>1</sub> <sup>o</sup> | 168.53                | 171.28   | 169.65   | 1.899E-1            | 1.310E-1 | 1.468E-1 |
|                                                                          | 4s <sup>2</sup> 4p4d <sup>3</sup> F <sub>2</sub> <sup>o</sup> | 153.42                | 155.17   | 153.40   | 4.650E-3            | 7.096E-4 | 2.758E-2 |
|                                                                          | 4s4p <sup>2</sup> 4p <sup>1</sup> D <sub>2</sub> <sup>o</sup> | 163.51                | 161.32   | 162.54   | 3.541E-2            |          | 4.490E-3 |
|                                                                          | 4s <sup>2</sup> 4p4d <sup>3</sup> P <sub>1</sub> <sup>o</sup> | 136.48                | 137.82   | 137.58   | 9.124E-2            | 2.271E-2 | 1.268E-1 |
|                                                                          | 4s <sup>2</sup> 4p4d <sup>3</sup> P <sub>2</sub> <sup>o</sup> | 138.51                | 138.24   | 139.46   | 6.610E-1            | 4.136E-1 | 5.55E-1  |
|                                                                          | 4s4p <sup>3</sup> <sup>1</sup> P <sub>1</sub> <sup>o</sup>    | 142.08                | 143.17   | 142.76   | 1.809E-1            | 3.697E-2 | 7.587E-2 |
|                                                                          | 4s <sup>2</sup> 4p4d <sup>1</sup> D <sub>2</sub> <sup>o</sup> | 125.02                | 124.99   | 125.83   | 4.744E-1            | 4.762E-1 | 4.876E-1 |
|                                                                          | 4s <sup>2</sup> 4p4d <sup>3</sup> P <sub>0</sub> <sup>o</sup> | 122.37                | 122.19   | 124.31   | 1.920E-1            | 4.762E-1 | 1.657E-1 |
|                                                                          | 4s <sup>2</sup> 4p4d <sup>3</sup> D <sub>1</sub> <sup>o</sup> | 122.05                | 122.21   | 122.90   | 3.999E-1            | 1.596E-1 | 1.268E-1 |
|                                                                          | 4s <sup>2</sup> 4p4d <sup>3</sup> D <sub>2</sub> <sup>o</sup> | 120.24                | 120.02   | 120.91   | 1.330E-1            | 2.910E-1 | 1.072E-1 |
|                                                                          | 4s <sup>2</sup> 4p4d <sup>1</sup> P <sub>1</sub> <sup>o</sup> | 111.76                | 111.71   | 112.48   | 1.519E-2            | 7.190E-2 | 1.190E-2 |
| 4s <sup>2</sup> 4p4p <sup>3</sup> P <sub>2</sub> <sup>e</sup>            | 4s4p <sup>2</sup> 4p <sup>5</sup> S <sub>2</sub> <sup>o</sup> | 315.20                | 298.48   | 300.26   | 1.110E-2            | 1.099E-2 | 1.118E-2 |
|                                                                          | 4s4p <sup>2</sup> 4p <sup>3</sup> D <sub>1</sub> <sup>o</sup> | 251.85                | 245.81   | 246.60   | 1.370E-2            | 1.440E-2 | 1.372E-2 |
|                                                                          | 4s4p <sup>2</sup> 4p <sup>3</sup> D <sub>2</sub> <sup>o</sup> | 238.11                | 230.63   | 231.97   | 2.583E-3            | 2.464E-3 | 2.354E-3 |
|                                                                          | 4s4p <sup>2</sup> 4p <sup>3</sup> D <sub>3</sub> <sup>o</sup> | 221.78                | 216.01   | 217.19   | 5.293E-2            | 4.808E-2 | 4.504E-2 |
|                                                                          | 4s4p <sup>2</sup> 4p <sup>3</sup> P <sub>1</sub> <sup>o</sup> | 197.30                | 194.06   | 194.60   | 5.453E-3            | 2.032E-3 | 3.884E-3 |
|                                                                          | 4s4p <sup>3</sup> <sup>3</sup> P <sub>2</sub> <sup>o</sup>    | 194.26                | 191.54   | 192.25   | 1.847E-1            | 1.831E-1 | 1.703E-1 |
|                                                                          | 4s4p <sup>2</sup> 4p <sup>3</sup> S <sub>1</sub> <sup>o</sup> | 174.10                | 177.03   | 175.24   | 3.248E-1            | 2.489E-1 | 2.698E-1 |
|                                                                          | 4s <sup>2</sup> 4p4d <sup>3</sup> F <sub>2</sub> <sup>o</sup> | 158.42                | 159.88   | 157.95   | 6.100E-4            | 3.953E-2 | 8.070E-2 |
|                                                                          | 4s4p <sup>2</sup> 4p <sup>1</sup> D <sub>2</sub> <sup>o</sup> | 169.19                | 166.41   | 167.66   | 9.027E-2            | 2.437E-3 | 1.001E-4 |
|                                                                          | 4s <sup>2</sup> 4p4d <sup>3</sup> F <sub>3</sub> <sup>o</sup> | 149.72                | 148.16   | 149.14   | 1.518E-1            | 1.347E-1 | 1.378E-1 |
|                                                                          | 4s <sup>2</sup> 4p4d <sup>3</sup> P <sub>1</sub> <sup>o</sup> | 140.41                | 141.52   | 141.24   | 6.750E-4            | 1.302E-2 | 6.882E-3 |
|                                                                          | 4s <sup>2</sup> 4p4d <sup>3</sup> P <sub>2</sub> <sup>o</sup> | 142.57                | 141.97   | 143.21   | 2.514E-1            | 2.124E-1 | 2.050E-1 |
|                                                                          | 4s4p <sup>3</sup> <sup>1</sup> P <sub>1</sub> <sup>o</sup>    | 146.35                | 147.17   | 146.70   | 5.896E-3            | 2.065E-3 | 3.176E-3 |
|                                                                          | 4s <sup>2</sup> 4p4d <sup>1</sup> D <sub>2</sub> <sup>o</sup> | 127.97                | 128.04   | 128.88   | 3.449E-1            | 3.027E-1 | 2.568E-1 |
|                                                                          | 4s <sup>2</sup> 4p4d <sup>3</sup> D <sub>3</sub> <sup>o</sup> | 125.29                | 125.59   | 125.94   | 1.038               | 8.252E-1 | 8.504E-1 |
|                                                                          | 4s <sup>2</sup> 4p4d <sup>3</sup> D <sub>1</sub> <sup>o</sup> | 125.19                | 125.11   | 125.80   | 7.406E-2            | 5.611E-2 | 5.936E-2 |
|                                                                          | 4s <sup>2</sup> 4p4d <sup>3</sup> D <sub>2</sub> <sup>o</sup> | 122.95                | 122.83   | 123.72   | 8.623E-2            | 5.481E-2 | 8.390E-2 |
|                                                                          | 4s <sup>2</sup> 4p4d <sup>1</sup> F <sub>3</sub> <sup>o</sup> | 116.00                | 116.57   | 116.79   | 1.824E-2            | 1.421E-1 | 1.722E-1 |

|                                                              |                                                   |        |        |        |          |          |          |
|--------------------------------------------------------------|---------------------------------------------------|--------|--------|--------|----------|----------|----------|
|                                                              | 4s <sup>2</sup> 4p4d <sup>1</sup> P <sub>1°</sub> | 114.08 | 114.15 | 114.91 | 6.280E-4 | 3.977E-5 | 5.324E-5 |
| 4s <sup>2</sup> 4p <sup>2</sup> <sup>1</sup> D <sub>2°</sub> | 4s4p <sup>2</sup> 4p <sup>5</sup> S <sub>2°</sub> | 468.48 | 429.92 | 439.26 | 7.320E-4 | 7.093E-4 | 8.322E-4 |
|                                                              | 4s4p <sup>2</sup> 4p <sup>3</sup> D <sub>1°</sub> | 341.00 | 328.54 | 333.19 | 3.140E-3 | 2.689E-3 | 3.152E-3 |
|                                                              | 4s4p <sup>2</sup> 4p <sup>3</sup> D <sub>2°</sub> | 316.28 | 301.97 | 307.04 | 2.966E-3 | 2.720E-3 | 2.94E-3  |
|                                                              | 4s4p <sup>2</sup> 4p <sup>3</sup> D <sub>3°</sub> | 288.11 | 277.39 | 281.66 | 5.205E-2 | 4.602E-2 | 5.63E-2  |
|                                                              | 4s4p <sup>2</sup> 4p <sup>3</sup> P <sub>1°</sub> | 248.11 | 242.21 | 244.81 | 6.440E-4 | 1.255E-3 | 4.85E-3  |
|                                                              | 4s4p <sup>3</sup> <sup>3</sup> P <sub>2°</sub>    | 243.32 | 238.29 | 241.10 | 1.368E-2 | 1.608E-2 | 1.251E-4 |
|                                                              | 4s4p <sup>2</sup> 4p <sup>3</sup> S <sub>1°</sub> | 212.51 | 216.25 | 214.93 | 9.276E-2 | 1.068E-2 | 3.372E-1 |
|                                                              | 4s <sup>2</sup> 4p4d <sup>3</sup> F <sub>2°</sub> | 189.59 | 191.19 | 189.49 | 1.271E-1 | 1.296E-2 | 1.008E-1 |
|                                                              | 4s4p <sup>2</sup> 4p <sup>1</sup> D <sub>2°</sub> | 205.24 | 200.60 | 203.64 | 5.884E-2 | 1.369E-1 | 1.376E-2 |
|                                                              | 4s <sup>2</sup> 4p4d <sup>3</sup> F <sub>3°</sub> | 177.26 | 174.67 | 176.95 | 1.753E-3 | 1.983E-3 | 1.882E-3 |
|                                                              | 4s <sup>2</sup> 4p4d <sup>3</sup> P <sub>1°</sub> | 164.37 | 165.52 | 165.94 | 2.543E-1 | 1.16E-2  | 9.454E-2 |
|                                                              | 4s <sup>2</sup> 4p4d <sup>3</sup> P <sub>2°</sub> | 167.33 | 166.12 | 168.67 | 3.035E-2 | 2.861E-2 | 2.162E-2 |
|                                                              | 4s4p <sup>3</sup> <sup>1</sup> P <sub>1°</sub>    | 172.57 | 173.30 | 172.52 | 2.346E-1 | 2.361E-1 | 2.342E-1 |
|                                                              | 4s <sup>2</sup> 4p4d <sup>1</sup> D <sub>2°</sub> | 147.57 | 147.37 | 148.39 | 9.397E-2 | 5.448E-2 | 7.130E-2 |
|                                                              | 4s <sup>2</sup> 4p4d <sup>3</sup> D <sub>3°</sub> | 144.02 | 144.13 | 144.51 | 1.518E-1 | 1.157E-1 | 1.331E-1 |
|                                                              | 4s <sup>2</sup> 4p4d <sup>3</sup> D <sub>1°</sub> | 143.89 | 143.50 | 145.03 | 1.098E-1 | 1.198E-1 | 2.648E-2 |
|                                                              | 4s <sup>2</sup> 4p4d <sup>3</sup> D <sub>2°</sub> | 140.94 | 140.51 | 141.59 | 5.926E-1 | 5.130E-1 | 4.814E-1 |
|                                                              | 4s <sup>2</sup> 4p4d <sup>1</sup> F <sub>3°</sub> | 131.88 | 132.37 | 132.59 | 1.140    | 9.137E-1 | 2.153E-1 |
|                                                              | 4s <sup>2</sup> 4p4d <sup>1</sup> P <sub>1°</sub> | 129.41 | 129.26 | 130.17 | 2.528E-3 | 6.0E-4   | 6.655E-5 |
| 4s <sup>2</sup> 4p <sup>2</sup> <sup>1</sup> S <sub>0°</sub> | 4s4p <sup>2</sup> 4p <sup>3</sup> D <sub>1°</sub> | 412.63 | 388.30 | 388.14 | 2.528E-3 | 2.3E-3   | 2.988E-3 |
|                                                              | 4s4p <sup>2</sup> 4p <sup>3</sup> P <sub>1°</sub> | 284.21 | 273.22 | 273.23 | 3.450E-2 | 2.84E-2  | 3.001E-2 |
|                                                              | 4s4p <sup>2</sup> 4p <sup>3</sup> S <sub>1°</sub> | 238.55 | 240.62 | 236.54 | 7.893E-2 | 6.38E-2  | 6.082E-2 |
|                                                              | 4s <sup>2</sup> 4p4d <sup>3</sup> P <sub>1°</sub> | 179.18 | 179.43 | 178.53 | 2.918E-1 | 4.86E-2  | 4.263E-3 |
|                                                              | 4s4p <sup>3</sup> <sup>1</sup> P <sub>1°</sub>    | 188.96 | 188.61 | 187.34 | 1.292E-2 |          | 2.715E-3 |
|                                                              | 4s <sup>2</sup> 4p4d <sup>3</sup> D <sub>1°</sub> | 155.11 | 153.84 | 154.56 | 3.260E-3 | 7.80E-3  | 2.627E-3 |
|                                                              | 4s <sup>2</sup> 4p4d <sup>1</sup> P <sub>1°</sub> | 138.41 | 137.59 | 138.43 | 2.288    |          | 1.879    |

**Table S7.** Transition wavelengths (in Å) and oscillator strengths for the transition between the energy levels of Ge-like Sb<sup>19+</sup> ion.

| Lower level                                                     | Upper level                                       | Transition wavelength |          | Oscillator strength |          |
|-----------------------------------------------------------------|---------------------------------------------------|-----------------------|----------|---------------------|----------|
|                                                                 |                                                   | This work             | Ref [12] | This work           | Ref [12] |
| 4s <sup>2</sup> 4p <sup>2</sup> <sup>3</sup> P <sub>0°</sub>    | 4s4p <sup>2</sup> 4p <sup>3</sup> D <sub>1°</sub> | 211.57                | 208.50   | 3.841E-1            | 3.489E-1 |
|                                                                 | 4s4p <sup>2</sup> 4p <sup>3</sup> P <sub>1°</sub> | 175.04                | 173.35   | 5.858E-2            | 5.709E-2 |
|                                                                 | 4s4p <sup>2</sup> 4p <sup>3</sup> S <sub>1°</sub> | 156.36                | 157.67   | 2.808E-1            | 2.169E-1 |
|                                                                 | 4s4p <sup>3</sup> <sup>1</sup> P <sub>1°</sub>    | 135.61                | 136.30   | 2.052               | 1.811    |
|                                                                 | 4s <sup>2</sup> 4p4d <sup>3</sup> P <sub>1°</sub> | 129.02                | 129.89   | 1.995E-1            | 5.810E-3 |
|                                                                 | 4s <sup>2</sup> 4p4d <sup>3</sup> D <sub>1°</sub> | 117.47                | 118.21   | 1.233E-2            | 1.810E-2 |
|                                                                 | 4s <sup>2</sup> 4p4d <sup>1</sup> P <sub>1°</sub> | 108.06                | 108.96   | 8.440E-3            | 8.435E-3 |
| 4s <sup>2</sup> 4p <sup>2</sup> 4p <sup>3</sup> P <sub>1°</sub> | 4s4p <sup>2</sup> 4p <sup>5</sup> S <sub>2°</sub> | 313.73                | 300.30   | 2.286E-2            | 2.353E-2 |
|                                                                 | 4s4p <sup>2</sup> 4p <sup>3</sup> D <sub>1°</sub> | 252.25                | 247.91   | 2.065E-4            | 4.356E-4 |
|                                                                 | 4s4p <sup>2</sup> 4p <sup>3</sup> D <sub>2°</sub> | 241.45                | 236.20   | 1.194E-1            | 1.034E-1 |

|                                                                          |                                                                 |        |        |          |          |
|--------------------------------------------------------------------------|-----------------------------------------------------------------|--------|--------|----------|----------|
|                                                                          | 4s4p <sup>2</sup> 4p̄ <sup>3</sup> P <sub>0</sub> <sup>o</sup>  | 207.31 | 204.51 | 4.905E-2 | 4.520E-2 |
|                                                                          | 4s4p <sup>2</sup> 4p̄ <sup>3</sup> P <sub>1</sub> <sup>o</sup>  | 201.99 | 199.75 | 1.483E-1 | 1.410E-1 |
|                                                                          | 4s4p <sup>3</sup> <sup>3</sup> P <sub>2</sub> <sup>o</sup>      | 198.72 | 197.14 | 1.540E-3 | 5.990E-3 |
|                                                                          | 4s4p <sup>2</sup> 4p̄ <sup>3</sup> S <sub>1</sub> <sup>o</sup>  | 177.52 | 179.21 | 1.968E-1 | 1.533E-1 |
|                                                                          | 4s4p <sup>2</sup> 4p̄ <sup>1</sup> D <sub>2</sub> <sup>o</sup>  | 174.54 | 173.53 | 3.044E-2 | 2.354E-2 |
|                                                                          | 4s <sup>2</sup> 4p̄4d̄ <sup>3</sup> F <sub>2</sub> <sup>o</sup> | 161.22 | 161.10 | 6.240E-3 | 1.500E-3 |
|                                                                          | 4s4p <sup>3</sup> <sup>1</sup> P <sub>1</sub> <sup>o</sup>      | 151.25 | 152.11 | 1.518E-1 | 9.023E-2 |
|                                                                          | 4s <sup>2</sup> 4p4d̄ <sup>3</sup> P <sub>2</sub> <sup>o</sup>  | 145.33 | 146.33 | 6.668E-1 | 5.560E-1 |
|                                                                          | 4s <sup>2</sup> 4p̄4d <sup>3</sup> P <sub>1</sub> <sup>o</sup>  | 143.09 | 144.16 | 1.182E-1 | 1.095E-1 |
|                                                                          | 4s <sup>2</sup> 4p4d <sup>1</sup> D <sub>2</sub> <sup>o</sup>   | 131.75 | 132.98 | 5.855E-1 | 4.986E-1 |
|                                                                          | 4s <sup>2</sup> 4p4d̄ <sup>3</sup> P <sub>0</sub> <sup>o</sup>  | 130.61 | 131.35 | 1.961E-1 | 1.690E-1 |
|                                                                          | 4s <sup>2</sup> 4p̄4d̄ <sup>3</sup> D <sub>1</sub> <sup>o</sup> | 129.03 | 129.91 | 4.179E-1 | 3.590E-1 |
|                                                                          | 4s <sup>2</sup> 4p̄4d <sup>3</sup> D <sub>2</sub> <sup>o</sup>  | 126.92 | 127.95 | 1.549E-1 | 1.240E-1 |
|                                                                          | 4s <sup>2</sup> 4p4d <sup>1</sup> P <sub>1</sub> <sup>o</sup>   | 117.77 | 118.83 | 1.516E-2 | 1.184E-2 |
| 4s <sup>2</sup> 4p̄4p <sup>3</sup> P <sub>2</sub> <sup>e</sup>           | 4s4p̄ <sup>2</sup> 4p <sup>5</sup> S <sub>2</sub> <sup>o</sup>  | 334.27 | 319.06 | 9.840E-3 | 9.990E-3 |
|                                                                          | 4s4p̄ <sup>2</sup> 4p <sup>3</sup> D <sub>1</sub> <sup>o</sup>  | 265.36 | 260.56 | 1.173E-2 | 1.186E-2 |
|                                                                          | 4s4p <sup>2</sup> 4p̄ <sup>3</sup> D <sub>2</sub> <sup>o</sup>  | 253.43 | 247.66 | 2.520E-3 | 2.350E-3 |
|                                                                          | 4s4p <sup>2</sup> 4p̄ <sup>3</sup> D <sub>3</sub> <sup>o</sup>  | 236.62 | 232.30 | 5.514E-2 | 4.670E-2 |
|                                                                          | 4s4p <sup>2</sup> 4p̄ <sup>3</sup> P <sub>1</sub> <sup>o</sup>  | 210.31 | 207.88 | 5.750E-3 | 4.180E-3 |
|                                                                          | 4s4p <sup>3</sup> <sup>3</sup> P <sub>2</sub> <sup>o</sup>      | 206.77 | 205.06 | 1.848E-1 | 1.711E-1 |
|                                                                          | 4s4p <sup>2</sup> 4p̄ <sup>3</sup> S <sub>1</sub> <sup>o</sup>  | 183.91 | 185.73 | 3.339E-1 | 2.766E-1 |
|                                                                          | 4s4p <sup>2</sup> 4p̄ <sup>1</sup> D <sub>2</sub> <sup>o</sup>  | 180.71 | 179.64 | 8.272E-2 | 2.660E-3 |
|                                                                          | 4s <sup>2</sup> 4p̄4d̄ <sup>3</sup> F <sub>2</sub> <sup>o</sup> | 166.47 | 166.35 | 4.870E-3 | 7.454E-2 |
|                                                                          | 4s <sup>2</sup> 4p̄4d̄ <sup>3</sup> F <sub>3</sub> <sup>o</sup> | 157.54 | 157.29 | 1.391E-1 | 1.266E-1 |
|                                                                          | 4s4p <sup>3</sup> <sup>1</sup> P <sub>1</sub> <sup>o</sup>      | 155.87 | 156.78 | 6.920E-3 | 1.940E-3 |
|                                                                          | 4s <sup>2</sup> 4p4d̄ <sup>3</sup> P <sub>2</sub> <sup>o</sup>  | 149.59 | 150.65 | 2.613E-1 | 2.136E-1 |
|                                                                          | 4s <sup>2</sup> 4p̄4d <sup>3</sup> P <sub>1</sub> <sup>o</sup>  | 147.22 | 148.35 | 7.545E-3 | 7.900E-3 |
|                                                                          | 4s <sup>2</sup> 4p4d <sup>1</sup> D <sub>2</sub> <sup>o</sup>   | 135.24 | 136.53 | 3.335E-1 | 2.452E-1 |
|                                                                          | 4s <sup>2</sup> 4p̄4d̄ <sup>3</sup> D <sub>1</sub> <sup>o</sup> | 132.37 | 133.30 | 1.961E-1 | 6.238E-2 |
|                                                                          | 4s <sup>2</sup> 4p4d <sup>1</sup> F <sub>3</sub> <sup>o</sup>   | 132.30 | 133.30 | 7.797E-2 | 8.716E-1 |
|                                                                          | 4s <sup>2</sup> 4p̄4d <sup>3</sup> D <sub>2</sub> <sup>o</sup>  | 130.15 | 131.24 | 1.047E-1 | 9.974E-1 |
|                                                                          | 4s <sup>2</sup> 4p4d̄ <sup>3</sup> D <sub>3</sub> <sup>o</sup>  | 122.51 | 123.60 | 1.068    | 1.855E-1 |
|                                                                          | 4s <sup>2</sup> 4p4d <sup>1</sup> P <sub>1</sub> <sup>o</sup>   | 120.55 | 121.67 | 6.403E-4 | 6.082E-5 |
| 4s <sup>2</sup> 4p <sup>2</sup> <sup>1</sup> D <sub>2</sub> <sup>e</sup> | 4s4p̄ <sup>2</sup> 4p <sup>5</sup> S <sub>2</sub> <sup>o</sup>  | 483.10 | 451.96 | 7.416E-4 | 8.428E-4 |
|                                                                          | 4s4p̄ <sup>2</sup> 4p <sup>3</sup> D <sub>1</sub> <sup>o</sup>  | 351.27 | 342.90 | 3.330E-3 | 3.330E-3 |
|                                                                          | 4s4p <sup>2</sup> 4p̄ <sup>3</sup> D <sub>2</sub> <sup>o</sup>  | 330.67 | 320.91 | 2.690E-3 | 2.170E-3 |
|                                                                          | 4s4p <sup>2</sup> 4p̄ <sup>3</sup> D <sub>3</sub> <sup>o</sup>  | 302.62 | 295.58 | 5.100E-2 | 4.422E-2 |



|                      |                                  |        |        |          |          |
|----------------------|----------------------------------|--------|--------|----------|----------|
|                      | $4s4p^24\bar{p} \ ^3P_1^o$       | 260.88 | 257.15 | 3.063E-4 | 3.996E-4 |
|                      | $4s4p^3 \ ^3P_2^o$               | 255.45 | 252.84 | 1.099E-2 | 1.156E-2 |
|                      | $4s4p^24\bar{p} \ ^3S_1^o$       | 221.45 | 224.09 | 7.800E-3 | 7.740E-3 |
|                      | $4s4p^24\bar{p} \ ^1D_2^o$       | 216.83 | 215.28 | 4.620E-2 | 1.323E-1 |
|                      | $4s^24\bar{p}4\bar{d} \ ^3F_2^o$ | 196.64 | 196.47 | 1.510E-1 | 3.714E-2 |
|                      | $4s^24\bar{p}4\bar{d} \ ^3F_3^o$ | 184.30 | 183.95 | 1.360E-3 | 1.530E-3 |
|                      | $4s4p^3 \ ^1P_1^o$               | 182.01 | 183.26 | 3.638E-2 | 2.522E-1 |
|                      | $4s^24p4\bar{d} \ ^3P_2^o$       | 173.51 | 174.94 | 3.290E-2 | 2.376E-2 |
|                      | $4s^2 \ 4\bar{p}4d \ ^3P_1^o$    | 170.33 | 171.85 | 2.848E-1 | 1.645E-2 |
|                      | $4s^2 \ 4p4d \ ^1D_2^o$          | 154.50 | 156.18 | 1.160E-1 | 8.740E-2 |
|                      | $4s^24\bar{p}4\bar{d} \ ^3D_1^o$ | 150.76 | 151.98 | 1.165E-2 | 9.040E-2 |
|                      | $4s^2 \ 4p4d \ ^1F_3^o$          | 150.68 | 151.97 | 1.045E-1 | 1.453E-1 |
|                      | $4s^2 \ 4\bar{p}4d \ ^3D_2^o$    | 147.89 | 149.30 | 5.846E-1 | 4.738E-1 |
|                      | $4s^24p4\bar{d} \ ^3D_3^o$       | 138.10 | 139.50 | 1.652E-1 | 9.664E-1 |
|                      | $4s^2 \ 4p4d \ ^1P_1^o$          | 135.61 | 137.03 | 2.410E-3 | 4.284E-7 |
| $4s^24p^2 \ ^1S_0^e$ | $4s4\bar{p}^24p \ ^3D_1^o$       | 423.79 | 411.68 | 2.670E-3 | 3.138E-3 |
|                      | $4s4p^24\bar{p} \ ^3P_1^o$       | 298.87 | 293.97 | 3.173E-2 | 2.793E-2 |
|                      | $4s4p^24\bar{p} \ ^3S_1^o$       | 248.23 | 251.55 | 8.052E-2 | 6.070E-2 |
|                      | $4s4p^3 \ ^1P_1^o$               | 199.73 | 201.22 | 3.530E-3 | 9.159E-5 |
|                      | $4s^2 \ 4\bar{p}4d \ ^3P_1^o$    | 185.75 | 187.55 | 3.129E-1 | 2.843E-1 |
|                      | $4s^24\bar{p}4\bar{d} \ ^3D_1^o$ | 162.72 | 164.13 | 2.300E-1 | 3.185E-3 |
|                      | $4s^2 \ 4p4d \ ^1P_1^o$          | 145.21 | 146.83 | 2.344    | 1.921    |

**Table S8.** Transition wavelengths (in Å) and oscillator strengths for the transition between the energy levels of Ge-like Sn<sup>18+</sup> ion.

| Lower level                | Upper level                         | Transition wavelength |          |          |                                              | Oscillator strength |          |         |
|----------------------------|-------------------------------------|-----------------------|----------|----------|----------------------------------------------|---------------------|----------|---------|
|                            |                                     | This work             | Ref [12] | Ref [11] | Ref [4]                                      | This work           | Ref [12] | Ref [4] |
| $4s^24\bar{p}^2 \ ^3P_0^e$ | $4s4\bar{p}^24p \ ^3D_1^o$          | 225.18                | 221.69   | 217.24   |                                              | 3.709E-1            | 3.364E-1 |         |
|                            | $4s4p^24\bar{p} \ ^3P_1^o$          | 187.59                | 185.62   | 184.10   |                                              | 5.983E-2            | 5.808E-2 |         |
|                            | $4s4p^24\bar{p} \ ^3S_1^o$          | 166.04                | 167.54   | 169.87   |                                              | 2.892E-1            | 2.239E-1 |         |
|                            | $4s^24\bar{p}4d \ ^3P_1^o$          | 135.93                | 136.85   | 140.42   |                                              | 5.469E-1            | 6.243E-1 |         |
|                            | $4s4p^3 \ ^1P_1^o$                  | 144.95                | 145.81   | 146.98   |                                              | 1.622E-2            | 6.107E-2 |         |
|                            | $4s^2 \ 4\bar{p}4\bar{d} \ ^3D_1^o$ | 124.43                | 125.31   | 127.38   | 140.38 <sup>(c)</sup> ,138.43 <sup>(d)</sup> | 1.659               | 1.873    | 1.690   |
|                            | $4s^2 \ 4p4d \ ^1P_1^o$             | 114.50                | 115.49   | 118.38   |                                              | 9.07E-3             | 1.199E-2 |         |
| $4s^24\bar{p}4p \ ^3P_1^e$ | $4s4\bar{p}^24p \ ^5S_2^o$          | 331.67                | 316.78   | 324.49   |                                              | 1.958E-2            | 2.040E-2 |         |
|                            | $4s4\bar{p}^24p \ ^3D_1^o$          | 264.89                | 260.18   | 254.56   |                                              | -                   | 1.190E-4 |         |

|                                                              |                                                     |        |        |        |                                                  |          |          |          |
|--------------------------------------------------------------|-----------------------------------------------------|--------|--------|--------|--------------------------------------------------|----------|----------|----------|
|                                                              | 4s4p <sup>2</sup> 4p̄                               |        |        |        |                                                  | 1.245E-1 | 1.079E-1 |          |
|                                                              | <sup>3</sup> D <sub>2°</sub>                        | 255.72 | 250.13 | 241.62 |                                                  |          |          |          |
|                                                              | 4s4p <sup>2</sup> 4p̄ <sup>3</sup> P <sub>0°</sub>  | 219.66 | 216.61 | 217.09 |                                                  | 4.906E-2 | 4.520E-2 |          |
|                                                              | 4s4p <sup>2</sup> 4p̄ <sup>3</sup> P <sub>1°</sub>  | 214.37 | 211.87 | 210.21 |                                                  | 1.433E-1 | 1.360E-1 |          |
|                                                              | 4s4p <sup>3</sup> <sup>3</sup> P <sub>2°</sub>      | 210.69 | 208.89 | 202.57 |                                                  | 8.45E-4  | 8.440E-4 |          |
|                                                              | 4s4p <sup>2</sup> 4p̄                               |        |        |        |                                                  | 2.037E-1 | 1.597E-1 |          |
|                                                              | <sup>3</sup> S <sub>1°</sub>                        | 186.68 | 188.63 | 191.87 |                                                  |          |          |          |
|                                                              | 4s <sup>2</sup> 4p̄4d̄ <sup>3</sup> F <sub>2°</sub> | 168.73 | 168.60 | 170.32 |                                                  | 7.114E-3 | 2.074E-3 |          |
|                                                              | 4s4p <sup>2</sup> 4p̄                               |        |        |        |                                                  | 2.685E-2 | 6.780E-3 |          |
|                                                              | <sup>1</sup> D <sub>2°</sub>                        | 185.61 | 184.72 | 174.99 |                                                  |          |          |          |
|                                                              | 4s <sup>2</sup> 4p̄4d <sup>3</sup> P <sub>1°</sub>  | 149.46 | 150.60 | 155.12 | 139.98 <sup>(c)</sup> ,<br>138.03 <sup>(d)</sup> | 3.342E-1 | 3.726E-1 | 3.370E-1 |
|                                                              | 4s <sup>2</sup> 4p4d̄ <sup>3</sup> P <sub>2°</sub>  | 151.97 | 153.11 | 158.01 |                                                  | 6.712E-1 | 5.553E-1 |          |
|                                                              | 4s4p <sup>3</sup> <sup>1</sup> P <sub>1°</sub>      | 160.43 | 161.53 | 163.16 |                                                  | 1.346E-1 | 9.767E-2 |          |
|                                                              | 4s <sup>2</sup> 4p4d <sup>1</sup> D <sub>2°</sub>   | 138.71 | 140.09 | 143.61 |                                                  | 5.964E-1 | 5.103E-1 |          |
|                                                              | 4s <sup>2</sup> 4p4d̄ <sup>3</sup> P <sub>0°</sub>  | 137.52 | 138.35 | 140.21 |                                                  | 2.006E-1 | 1.725E-1 |          |
|                                                              | 4s <sup>2</sup> 4p̄4d̄ <sup>3</sup> D <sub>1°</sub> | 135.66 | 136.75 | 139.37 |                                                  | 1.366E-1 | 3.726E-1 |          |
|                                                              | 4s <sup>2</sup> 4p̄4d̄ <sup>3</sup> D <sub>2°</sub> | 133.81 | 134.96 | 139.00 |                                                  | 1.803E-1 | 1.432E-1 |          |
|                                                              | 4s <sup>2</sup> 4p4d <sup>1</sup> P <sub>1°</sub>   | 123.95 | 125.14 | 128.66 |                                                  | 1.501E-2 | 1.169E-2 |          |
| 4s <sup>2</sup> 4p̄4p <sup>3</sup> P <sub>2°</sub>           | 4s4p̄ <sup>2</sup> 4p <sup>5</sup> S <sub>2°</sub>  | 353.52 | 334.94 | 341.32 |                                                  | 8.635E-3 | 8.832E-3 |          |
|                                                              | 4s4p̄ <sup>2</sup> 4p̄                              |        |        |        |                                                  | 9.886E-3 | 1.014E-2 |          |
|                                                              | <sup>3</sup> D <sub>1°</sub>                        | 278.64 | 272.31 | 264.81 |                                                  |          |          |          |
|                                                              | 4s4p <sup>2</sup> 4p̄ <sup>3</sup> D <sub>2°</sub>  | 268.51 | 261.32 | 250.84 |                                                  | 2.387E-3 | 2.278E-3 |          |
|                                                              | 4s4p <sup>2</sup> 4p̄ <sup>3</sup> D <sub>3°</sub>  | 251.42 | 245.79 | 234.97 |                                                  | 5.745E-2 | 4.838E-2 |          |
|                                                              | 4s4p <sup>2</sup> 4p̄ <sup>3</sup> P <sub>1°</sub>  | 223.28 | 219.84 | 217.15 |                                                  | 6.091E-3 | 4.514E-3 |          |
|                                                              | 4s4p <sup>3</sup> <sup>3</sup> P <sub>2°</sub>      | 219.30 | 216.63 | 209.01 |                                                  | 1.829E-1 | 1.701E-1 |          |
|                                                              | 4s4p <sup>2</sup> 4p̄ <sup>3</sup> S <sub>1°</sub>  | 193.41 | 194.93 | 197.63 |                                                  | 3.434E-1 | 2.836E-1 |          |
|                                                              | 4s <sup>2</sup> 4p̄4d̄ <sup>3</sup> F <sub>2°</sub> | 174.20 | 173.61 | 174.84 |                                                  | 1.066E-1 | 6.768E-2 |          |
|                                                              | 4s4p <sup>2</sup> 4p̄ <sup>1</sup> D <sub>2°</sub>  | 192.26 | 190.75 | 179.78 |                                                  | 7.447E-2 | 6.646E-3 |          |
|                                                              | 4s <sup>2</sup> 4p4d̄ <sup>3</sup> F <sub>3°</sub>  | 165.22 | 164.57 | 163.60 |                                                  | 1.268E-1 | 1.155E-1 |          |
|                                                              | 4s <sup>2</sup> 4p4d̄ <sup>3</sup> P <sub>1°</sub>  | 153.74 | 154.59 | 158.86 |                                                  | -        | 6.566E-2 |          |
|                                                              | 4s <sup>2</sup> 4p4d̄ <sup>3</sup> P <sub>2°</sub>  | 156.40 | 157.23 | 161.90 | 161.51 <sup>(c)</sup> ,158.33 <sup>(d)</sup>     | 2.725E-1 | 2.234E-1 | 8.520E-2 |
|                                                              | 4s4p <sup>3</sup> <sup>1</sup> P <sub>1°</sub>      | 165.38 | 166.12 | 167.31 |                                                  | 7.813E-3 | 1.188E-3 |          |
|                                                              | 4s <sup>2</sup> 4p4d <sup>1</sup> D <sub>2°</sub>   | 142.39 | 143.53 | 146.82 | 147.60 <sup>(c)</sup> ,144.61 <sup>(d)</sup>     | 3.194E-1 | 2.316E-1 | 7.260E-2 |
|                                                              | 4s <sup>2</sup> 4p4d̄ <sup>3</sup> D <sub>3°</sub>  | 139.42 | 140.17 | 142.84 | 142.79 <sup>(c)</sup> ,<br>141.20 <sup>(d)</sup> | 1.101E-1 | --       | 7.682E-1 |
|                                                              | 4s <sup>2</sup> 4p̄4d̄ <sup>3</sup> D <sub>1°</sub> | 139.18 | 140.02 | 142.38 |                                                  | 8.224E-2 | 8.640E-3 |          |
|                                                              | 4s <sup>2</sup> 4p̄4d̄ <sup>3</sup> D <sub>2°</sub> | 137.23 | 138.15 | 142.00 |                                                  | 1.263E-1 | 1.178E-1 |          |
|                                                              | 4s <sup>2</sup> 4p4d̄ <sup>1</sup> F <sub>3°</sub>  | 128.88 | 129.85 | 130.87 |                                                  | 2.090E-1 | 1.983E-1 |          |
|                                                              | 4s <sup>2</sup> 4p4d̄ <sup>1</sup> P <sub>1°</sub>  | 126.88 | 127.88 | 131.23 |                                                  | 6.510E-4 | 1.355E-5 |          |
| 4s <sup>2</sup> 4p <sup>2</sup> <sup>1</sup> D <sub>2°</sub> | 4s4p̄ <sup>2</sup> 4p <sup>5</sup> S <sub>2°</sub>  | 498.12 | 458.25 | 476.94 |                                                  | 7.340E-4 | 8.368E-4 |          |
|                                                              | 4s4p̄ <sup>2</sup> 4p̄ <sup>3</sup> D <sub>1°</sub> | 361.32 | 348.56 | 339.76 |                                                  | 3.492E-3 | 3.48E-3  |          |
|                                                              | 4s4p <sup>2</sup> 4p̄ <sup>3</sup> D <sub>2°</sub>  | 344.46 | 330.76 | 317.10 |                                                  | 2.434E-3 | 1.940E-3 |          |
|                                                              | 4s4p <sup>2</sup> 4p̄ <sup>3</sup> D <sub>3°</sub>  | 316.83 | 306.26 | 292.16 |                                                  | 4.969E-2 | 4.320E-2 |          |
|                                                              | 4s4p <sup>2</sup> 4p̄ <sup>3</sup> P <sub>1°</sub>  | 273.42 | 267.00 | 265.11 |                                                  | 9.200E-5 | 1.501E-4 |          |
|                                                              | 4s4p <sup>3</sup> <sup>3</sup> P <sub>2°</sub>      | 267.47 | 262.28 | 253.07 |                                                  | 8.346E-3 | 9.280E-3 |          |
|                                                              | 4s4p <sup>2</sup> 4p̄                               |        |        |        |                                                  | 6.255E-3 | 6.710E-3 |          |
|                                                              | <sup>3</sup> S <sub>1°</sub>                        | 229.92 | 231.12 | 236.59 |                                                  |          |          |          |
|                                                              | 4s <sup>2</sup> 4p̄4d̄ <sup>3</sup> F <sub>2°</sub> | 228.31 | 225.27 | 211.45 |                                                  | 1.696E-1 | 3.072E-2 |          |
|                                                              | 4s4p <sup>2</sup> 4p̄ <sup>1</sup> D <sub>2°</sub>  | 203.28 | 201.75 | 204.65 |                                                  | 3.856E-2 | 1.475E-1 |          |

|                                                              |                                                     |        |        |        |                                              |          |          |          |
|--------------------------------------------------------------|-----------------------------------------------------|--------|--------|--------|----------------------------------------------|----------|----------|----------|
|                                                              | 4s <sup>2</sup> 4p̄4d <sup>3</sup> P <sub>1°</sub>  | 175.95 | 176.51 | 183.09 |                                              | 3.035E-1 | 1.246E-2 |          |
|                                                              | 4s <sup>2</sup> 4p̄4d̄ <sup>3</sup> F <sub>3°</sub> | 191.15 | 189.65 | 189.42 |                                              | 4.923E-3 | 1.190E-3 |          |
|                                                              | 4s <sup>2</sup> 4p̄4d̄ <sup>3</sup> P <sub>2°</sub> | 179.45 | 179.96 | 187.14 | 159.64 <sup>(c)</sup> ,156.46 <sup>(d)</sup> | 2.649E-2 | 2.680E-2 | 2.874E-1 |
|                                                              | 4s4p <sup>3</sup> <sup>1</sup> P <sub>1°</sub>      | 191.36 | 191.70 | 194.41 |                                              | 2.754E-2 | 2.636E-2 |          |
|                                                              | 4s <sup>2</sup> 4p̄4d <sup>1</sup> D <sub>2°</sub>  | 161.24 | 162.23 | 167.28 |                                              | 1.422E-1 | 1.061E-1 |          |
|                                                              | 4s <sup>2</sup> 4p̄4d̄ <sup>3</sup> D <sub>3°</sub> | 157.14 | 157.77 | 161.54 |                                              | 1.780E-1 | 1.572E-1 |          |
|                                                              | 4s <sup>2</sup> 4p̄4d̄ <sup>3</sup> D <sub>1°</sub> | 157.45 | 157.96 | 162.13 |                                              | 9.954E-2 | 8.664E-2 |          |
|                                                              | 4s <sup>2</sup> 4p̄4d <sup>3</sup> D <sub>2°</sub>  | 154.66 | 155.40 | 161.05 |                                              | 5.741E-1 | 4.644E-1 |          |
|                                                              | 4s <sup>2</sup> 4p̄4d <sup>1</sup> F <sub>3°</sub>  | 144.14 | 144.97 | 146.89 | 146.34 <sup>(c)</sup> ,146.98 <sup>(d)</sup> | 1.104    | 9.868E-1 | 1.026    |
|                                                              | 4s <sup>2</sup> 4p̄4d <sup>1</sup> P <sub>1°</sub>  | 141.64 | 142.52 | 147.34 |                                              | 2.366E-3 | 6.492E-6 |          |
| 4s <sup>2</sup> 4p <sup>2</sup> <sup>1</sup> S <sub>0°</sub> | 4s4p̄ <sup>2</sup> 4p̄ <sup>3</sup> D <sub>1°</sub> | 436.02 | 410.10 | 388.68 |                                              | 2.767E-3 | 3.255E-3 |          |
|                                                              | 4s4p <sup>2</sup> 4p̄ <sup>3</sup> P <sub>1°</sub>  | 314.14 | 301.67 | 293.98 |                                              | 2.900E-2 | 2.584E-2 |          |
|                                                              | 4s4p <sup>2</sup> 4p̄ <sup>3</sup> S <sub>1°</sub>  | 258.06 | 256.66 | 259.31 |                                              | 8.228E-2 | 6.057E-2 |          |
|                                                              | 4s <sup>2</sup> 4p̄4d <sup>3</sup> P <sub>1°</sub>  | 191.97 | 191.03 | 196.41 |                                              | 3.259E-1 | 1.830E-4 |          |
|                                                              | 4s4p <sup>3</sup> <sup>1</sup> P <sub>1°</sub>      | 210.46 | 208.95 | 209.50 |                                              | 7.940E-2 | 2.935E-1 |          |
|                                                              | 4s <sup>2</sup> 4p̄4d̄ <sup>3</sup> D <sub>1°</sub> | 170.15 | 169.49 | 172.49 |                                              | 1.567E-3 | 2.340E-3 |          |
|                                                              | 4s <sup>2</sup> 4p̄4d <sup>1</sup> P <sub>1°</sub>  | 151.83 | 151.83 | 155.84 | 156.08 <sup>(c)</sup> ,154.12 <sup>(d)</sup> | 1.406    | 1.966    | 1.518    |

<sup>(c)</sup>Theoretical and <sup>(d)</sup>experimental results [4]

**Table S9.** Transition wavelengths (in Å) and oscillator strengths for the transition between the energy levels of Ge-like In<sup>17+</sup> ion.

| Lower level                                                   | Upper level                                         | Transition wavelength |          | Oscillator strength |          |
|---------------------------------------------------------------|-----------------------------------------------------|-----------------------|----------|---------------------|----------|
|                                                               |                                                     | this work             | Ref [12] | this work           | Ref [12] |
| 4s <sup>2</sup> 4p̄ <sup>2</sup> <sup>3</sup> P <sub>0°</sub> | 4s4p̄ <sup>2</sup> 4p̄ <sup>3</sup> D <sub>1°</sub> | 241.37                | 237.34   | 3.574E-1            | 3.236E-1 |
|                                                               | 4s4p <sup>2</sup> 4p̄ <sup>3</sup> P <sub>1°</sub>  | 202.39                | 200.07   | 6.136E-2            | 5.973E-2 |
|                                                               | 4s4p <sup>2</sup> 4p̄ <sup>3</sup> S <sub>1°</sub>  | 178.31                | 179.12   | 2.973E-1            | 2.316E-1 |
|                                                               | 4s4p <sup>3</sup> <sup>1</sup> P <sub>1°</sub>      | 155.94                | 156.97   | 1.220E-1            | 5.042E-2 |
|                                                               | 4s <sup>2</sup> 4p̄4d <sup>3</sup> P <sub>1°</sub>  | 144.19                | 145.19   | 2.241               | 1.926    |
|                                                               | 4s <sup>2</sup> 4p̄4d̄ <sup>3</sup> D <sub>1°</sub> | 133.09                | 134.00   | 2.150E-2            | 1.039E-2 |
|                                                               | 4s <sup>2</sup> 4p̄4d <sup>1</sup> P <sub>1°</sub>  | 122.13                | 123.24   | 9.670E-3            | 1.291E-2 |
| 4s <sup>2</sup> 4p̄4p <sup>3</sup> P <sub>1°</sub>            | 4s4p̄ <sup>2</sup> 4p̄ <sup>5</sup> S <sub>2°</sub> | 353.53                | 336.49   | 1.649E-2            | 1.736E-2 |
|                                                               | 4s4p <sup>2</sup> 4p̄ <sup>3</sup> D <sub>2°</sub>  | 272.57                | 266.35   | 1.291E-1            | 1.120E-1 |
|                                                               | 4s4p <sup>2</sup> 4p̄ <sup>3</sup> P <sub>0°</sub>  | 234.32                | 230.80   | 4.909E-2            | 4.523E-2 |
|                                                               | 4s4p <sup>2</sup> 4p̄ <sup>3</sup> P <sub>1°</sub>  | 229.06                | 226.09   | 1.380E-1            | 1.309E-1 |
|                                                               | 4s4p <sup>3</sup> <sup>3</sup> P <sub>2°</sub>      | 225.02                | 222.76   | 3.264E-4            | 3.440E-4 |
|                                                               | 4s4p <sup>2</sup> 4p̄ <sup>1</sup> D <sub>2°</sub>  | 198.68                | 197.79   | 7.530E-3            | 7.200E-3 |
|                                                               | 4s4p <sup>2</sup> 4p̄ <sup>3</sup> S <sub>1°</sub>  | 197.57                | 199.70   | 2.107E-1            | 1.664E-1 |
|                                                               | 4s <sup>2</sup> 4p̄4d̄ <sup>3</sup> F <sub>2°</sub> | 177.82                | 177.61   | 2.411E-2            | 1.868E-2 |

|                             |                                   |        |        |          |          |
|-----------------------------|-----------------------------------|--------|--------|----------|----------|
|                             | $4s4p^3\ ^1P_1^o$                 | 171.31 | 172.55 | 1.456E-1 | 1.024E-1 |
|                             | $4s^2\ 4\bar{p}4d\ ^3P_1^o$       | 157.23 | 158.41 | 1.227E-1 | 9.340E-2 |
|                             | $4s^2\ 4p4\bar{d}\ ^3P_2^o$       | 160.07 | 161.30 | 6.745E-1 | 5.533E-1 |
|                             | $4s^2\ 4p4d\ ^1D_2^o$             | 147.06 | 148.55 | 6.068E-1 | 5.233E-1 |
|                             | $4s^2\ 4p4\bar{d}\ ^3P_0^o$       | 145.81 | 146.69 | 2.054E-1 | 1.763E-1 |
|                             | $4s^2\ 4\bar{p}4\bar{d}\ ^3D_1^o$ | 144.12 | 145.19 | 4.564E-1 | 3.870E-1 |
|                             | $4s^2\ 4\bar{p}4d\ ^3D_2^o$       | 142.05 | 143.28 | 2.096E-1 | 1.651E-1 |
|                             | $4s^2\ 4p4d\ ^1P_1^o$             | 131.36 | 132.64 | 1.476E-2 | 1.147E-2 |
| $4s^2\ 4\bar{p}4p\ ^3P_2^e$ | $4s4\bar{p}^2\ 4p\ ^5S_2^o$       | 377.19 | 357.85 | 7.510E-3 | 7.720E-3 |
|                             | $4s4p^2\ 4\bar{p}\ ^3D_2^o$       | 286.42 | 279.55 | 2.170E-3 | 2.130E-3 |
|                             | $4s4p^2\ 4\bar{p}\ ^3D_3^o$       | 269.08 | 263.66 | 5.989E-2 | 5.020E-2 |
|                             | $4s4p^2\ 4\bar{p}\ ^3P_1^o$       | 238.76 | 235.54 | 6.490E-3 | 4.890E-3 |
|                             | $4s4p^3\ ^3P_2^o$                 | 234.37 | 231.93 | 1.793E-1 | 1.678E-1 |
|                             | $4s4p^2\ 4\bar{p}\ ^1D_2^o$       | 205.94 | 204.98 | 3.532E-1 | 1.100E-2 |
|                             | $4s4p^2\ 4\bar{p}\ ^3S_1^o$       | 204.75 | 207.03 | 6.642E-2 | 6.100E-2 |
|                             | $4s^2\ 4\bar{p}4\bar{d}\ ^3F_2^o$ | 183.62 | 183.39 | 1.677E-2 | 2.908E-1 |
|                             | $4s4p^3\ ^1P_1^o$                 | 176.68 | 178.00 | 1.148E-1 | 1.678E-1 |
|                             | $4s^2\ 4\bar{p}4\bar{d}\ ^3F_3^o$ | 174.61 | 174.30 | 8.820E-3 | 9.400E-3 |
|                             | $4s^2\ 4p4\bar{d}\ ^3P_2^o$       | 164.75 | 166.05 | 2.850E-1 | 2.346E-1 |
|                             | $4s^2\ 4\bar{p}4d\ ^3P_1^o$       | 161.74 | 163.00 | 4.124E-4 | 9.400E-3 |
|                             | $4s^2\ 4p4d\ ^1D_2^o$             | 151.00 | 152.57 | 3.025E-1 | 2.160E-1 |
|                             | $4s^2\ 4\bar{p}4\bar{d}\ ^3D_1^o$ | 147.91 | 149.02 | 2.206E-1 | 6.930E-2 |
|                             | $4s^2\ 4p4d\ ^1F_3^o$             | 147.48 | 148.72 | 8.694E-2 | 9.202E-1 |
|                             | $4s^2\ 4\bar{p}4d\ ^3D_2^o$       | 145.72 | 147.01 | 1.513E-1 | 1.385E-1 |
|                             | $4s^2\ 4p4\bar{d}\ ^3D_3^o$       | 136.55 | 137.88 | 1.138    | 2.102E-1 |
|                             | $4s^2\ 4p4d\ ^1P_1^o$             | 134.49 | 135.83 | 6.629E-4 | 7.288E-5 |
| $4s^2\ 4p^2\ ^1D_2^e$       | $4s4\bar{p}^2\ 4p\ ^5S_2^o$       | 518.97 | 483.06 | 7.096E-4 | 8.124E-4 |
|                             | $4s4\bar{p}^2\ 4p\ ^3D_1^o$       | 375.07 | 365.44 | 3.610E-3 | 3.590E-3 |
|                             | $4s4p^2\ 4\bar{p}\ ^3D_2^o$       | 361.40 | 350.53 | 2.200E-3 | 1.740E-3 |
|                             | $4s4p^2\ 4\bar{p}\ ^3D_3^o$       | 334.22 | 325.90 | 4.811E-2 | 4.198E-2 |
|                             | $4s4p^3\ ^3P_2^o$                 | 282.30 | 278.76 | 5.930E-3 | 7.070E-3 |
|                             | $4s4p^2\ 4\bar{p}\ ^1D_2^o$       | 242.05 | 240.72 | 1.850E-1 | 1.599E-1 |
|                             | $4s4p^2\ 4\bar{p}\ ^3S_1^o$       | 240.40 | 243.55 | 4.680E-3 | 5.620E-3 |
|                             | $4s^2\ 4\bar{p}4\bar{d}\ ^3F_2^o$ | 211.78 | 211.48 | 3.364E-2 | 2.684E-2 |
|                             | $4s4p^3\ ^1P_1^o$                 | 202.60 | 204.34 | 3.174E-1 | 2.728E-1 |
|                             | $4s^2\ 4\bar{p}4\bar{d}\ ^3F_3^o$ | 199.89 | 199.49 | 6.530E-4 | 8.728E-4 |
|                             | $4s^2\ 4p4\bar{d}\ ^3P_2^o$       | 187.08 | 188.75 | 4.128E-2 | 3.096E-2 |

|                       |                                   |        |        |          |          |
|-----------------------|-----------------------------------|--------|--------|----------|----------|
|                       | $4s^2 4\bar{p}4d \ ^3P_1^o$       | 183.21 | 184.82 | 2.308E-2 | 1.058E-2 |
|                       | $4s^2 4\bar{p}4\bar{d} \ ^3D_1^o$ | 165.65 | 167.06 | 9.473E-2 | 8.308E-2 |
|                       | $4s^2 4p4d \ ^1F_3^o$             | 165.12 | 166.68 | 1.897E-1 | 1.684E-1 |
|                       | $4s^2 4\bar{p}4d \ ^3D_2^o$       | 162.91 | 164.54 | 5.604E-1 | 4.530E-1 |
|                       | $4s^2 4p4\bar{d} \ ^3D_3^o$       | 151.54 | 153.17 | 1.226    | 1.010    |
|                       | $4s^2 4p4d \ ^1P_1^o$             | 149.01 | 150.66 | 2.380E-3 | 1.594E-5 |
| $4s^2 4p^2 \ ^1S_0^e$ | $4s4\bar{p}^2 4p \ ^3D_1^o$       | 452.96 | 438.99 | 2.830E-3 | 3.280E-3 |
|                       | $4s4p^2 4\bar{p} \ ^3P_1^o$       | 332.72 | 326.50 | 2.635E-2 | 2.374E-2 |
|                       | $4s4p^2 4\bar{p} \ ^3S_1^o$       | 270.19 | 274.17 | 8.427E-2 | 6.044E-2 |
|                       | $4s4p^3 \ ^1P_1^o$                | 223.35 | 225.46 | 3.355E-1 | 3.013E-1 |
|                       | $4s^2 4\bar{p}4\bar{d} \ ^3D_1^o$ | 179.27 | 180.91 | 1.020E-3 | 1.690E-3 |
|                       | $4s^2 4p4d \ ^1P_1^o$             | 159.93 | 161.84 | 2.47301  | 2.017    |

**Table S10.** Transition wavelengths (in Å) and oscillator strengths for the transition between the energy levels of Ge-like Cd<sup>16+</sup> ion.

| Lower level                  | Upper level                        | Transition wavelength |          |         | Oscillator strength |          |
|------------------------------|------------------------------------|-----------------------|----------|---------|---------------------|----------|
|                              |                                    | This work             | Ref [13] | Ref [9] | This work           | Ref [13] |
| $4s^2 4\bar{p}^2 \ ^3P_0^e$  | $4s4\bar{p}^2 4p \ ^3D_1^o$        | 257.88                | 252.48   | 252.30  | 3.427E-1            | 3.109E-1 |
|                              | $4s4p^2 4\bar{p}^3 P_1^o$          | 217.56                | 214.38   |         | 6.377E-2            | 6.025E-2 |
|                              | $4s4p^2 4\bar{p} \ ^3S_1^o$        | 188.77                | 193.04   | 193.34  | 3.077E-1            | 2.089E-1 |
|                              | $4s^2 4p4\bar{d} \ ^3P_1^o$        | 152.45                | 154.71   |         | 1.103E-1            |          |
|                              | $4s4p^3 \ ^1P_1^o$                 | 167.10                | 169.74   |         | 2.313E-1            | 3.090E-1 |
|                              | $4s^2 4p4\bar{d} \ ^3D_1^o$        | 142.02                | 143.41   |         | 2.867E-2            |          |
|                              | $4s^2 4p4d \ ^1P_1^o$              | 130.14                | 131.91   |         | 1.021E-2            |          |
| $4s^2 4\bar{p} 4p \ ^3P_1^e$ | $4s4\bar{p}^2 4p \ ^5S_2^o$        | 377.06                | 353.19   |         | 1.364E-2            | 1.523E-2 |
|                              | $4s4\bar{p}^2 4p \ ^3D_1^o$        | 296.53                | 289.19   |         | 3.520E-2            | 3.653E-2 |
|                              | $4s4p^2 4\bar{p} \ ^3D_2^o$        | 290.19                | 281.44   | 281.22  | 1.331E-1            | 1.103E-1 |
|                              | $4s4p^2 4\bar{p} \ ^3P_0^o$        | 249.73                | 244.71   |         | 4.910E-2            | 4.293E-2 |
|                              | $4s4p^2 4\bar{p} \ ^3P_1^o$        | 244.55                | 240.28   |         | 1.325E-1            | 1.267E-1 |
|                              | $4s4p^3 \ ^3P_2^o$                 | 240.22                | 236.81   |         | 4.000E-5            | 1.559E-4 |
|                              | $4s4p^2 4\bar{p} \ ^3S_1^o$        | 208.84                | 213.79   | 214.35  | 2.177E-1            | 1.599E-1 |
|                              | $4s^2 4\bar{p} 4\bar{d} \ ^3F_2^o$ | 186.86                | 186.83   |         | 7.659E-3            |          |
|                              | $4s4p^2 4\bar{p} \ ^1D_2^o$        | 211.83                | 211.12   |         | 2.188E-2            |          |
|                              | $4s^2 4\bar{p} 4d \ ^3P_1^o$       | 164.94                | 167.76   |         | 1.548E-1            |          |
|                              | $4s^2 4p4\bar{d} \ ^3P_2^o$        | 168.12                | 170.81   |         | 6.761E-1            |          |
|                              | $4s4p^3 \ ^1P_1^o$                 | 182.22                | 185.57   |         | 1.133E-1            | 8.756E-2 |
|                              | $4s^2 4p4d \ ^1D_2^o$              | 155.81                | 158.18   |         | 6.166E-1            |          |
|                              | $4s^2 4p4\bar{d} \ ^3P_0^o$        | 154.11                | 155.94   |         | 2.106E-1            |          |

|                                                              |                                                   |        |        |        |          |          |
|--------------------------------------------------------------|---------------------------------------------------|--------|--------|--------|----------|----------|
|                                                              | 4s <sup>2</sup> 4p4d <sup>3</sup> D <sub>1°</sub> | 151.78 | 154.34 |        | 4.776E-1 |          |
|                                                              | 4s <sup>2</sup> 4p4d <sup>3</sup> D <sub>2°</sub> | 150.69 | 152.73 |        | 2.434E-1 |          |
|                                                              | 4s <sup>2</sup> 4p4d <sup>1</sup> P <sub>1°</sub> | 139.11 | 141.28 |        | 1.439E-2 |          |
| 4s <sup>2</sup> 4p4p <sup>3</sup> P <sub>2°</sub>            | 4s4p <sup>2</sup> 4p <sup>5</sup> S <sub>2°</sub> | 402.54 | 373.24 |        | 6.463E-3 | 7.096E-3 |
|                                                              | 4s4p <sup>2</sup> 4p <sup>3</sup> D <sub>1°</sub> | 312.06 | 302.50 |        | 6.672E-3 | 7.780E-3 |
|                                                              | 4s4p <sup>2</sup> 4p <sup>3</sup> D <sub>2°</sub> | 305.05 | 294.03 |        | 1.876E-3 | 2.046E-3 |
|                                                              | 4s4p <sup>2</sup> 4p <sup>3</sup> D <sub>3°</sub> | 287.65 | 278.34 | 277.86 | 6.245E-2 | 4.908E-2 |
|                                                              | 4s4p <sup>2</sup> 4p <sup>3</sup> P <sub>1°</sub> | 255.02 | 249.39 |        | 6.959E-3 | 3.724E-3 |
|                                                              | 4s4p <sup>3</sup> <sup>3</sup> P <sub>2°</sub>    | 250.31 | 245.66 | 245.57 | 1.745E-1 | 1.625E-1 |
|                                                              | 4s4p <sup>2</sup> 4p <sup>3</sup> S <sub>1°</sub> | 216.43 | 220.98 | 221.40 | 2.632E-1 | 2.696E-1 |
|                                                              | 4s <sup>2</sup> 4p4d <sup>3</sup> F <sub>2°</sub> | 192.93 | 192.29 |        | 2.260E-2 |          |
|                                                              | 4s4p <sup>2</sup> 4p <sup>1</sup> D <sub>2°</sub> | 219.67 | 218.13 |        | 5.874E-2 | 1.383E-2 |
|                                                              | 4s <sup>2</sup> 4p4d <sup>3</sup> P <sub>1°</sub> | 169.65 | 172.16 |        | 1.220E-3 |          |
|                                                              | 4s <sup>2</sup> 4p4d <sup>3</sup> F <sub>3°</sub> | 183.99 | 183.22 |        | 1.032E-1 |          |
|                                                              | 4s <sup>2</sup> 4p4d <sup>3</sup> P <sub>2°</sub> | 173.01 | 175.37 |        | 2.986E-1 |          |
|                                                              | 4s4p <sup>3</sup> <sup>1</sup> P <sub>1°</sub>    | 187.99 | 190.97 |        | 7.300E-4 | 1.103E-3 |
|                                                              | 4s <sup>2</sup> 4p4d <sup>1</sup> D <sub>2°</sub> | 159.58 | 162.08 |        | 2.826E-1 |          |
|                                                              | 4s <sup>2</sup> 4p4d <sup>3</sup> D <sub>3°</sub> | 155.76 | 158.05 |        | 1.178    |          |
|                                                              | 4s <sup>2</sup> 4p4d <sup>3</sup> D <sub>1°</sub> | 156.78 | 158.28 |        | 9.210E-2 |          |
|                                                              | 4s <sup>2</sup> 4p4d <sup>3</sup> D <sub>2°</sub> | 154.19 | 156.37 |        | 1.822E-1 |          |
|                                                              | 4s <sup>2</sup> 4p4d <sup>1</sup> F <sub>3°</sub> | 144.19 | 146.74 |        | 2.302E-1 |          |
|                                                              | 4s <sup>2</sup> 4p4d <sup>1</sup> P <sub>1°</sub> | 142.06 | 144.38 |        | 6.740E-4 |          |
| 4s <sup>2</sup> 4p <sup>2</sup> <sup>1</sup> D <sub>2°</sub> | 4s4p <sup>2</sup> 4p <sup>5</sup> S <sub>2°</sub> | 540.70 | 487.73 |        | 6.670E-4 | 7.962E-4 |
|                                                              | 4s4p <sup>2</sup> 4p <sup>3</sup> D <sub>1°</sub> | 389.88 | 373.57 |        | 3.665E-3 | 3.474E-2 |
|                                                              | 4s4p <sup>2</sup> 4p <sup>3</sup> D <sub>2°</sub> | 379.01 | 360.73 |        | 2.001E-3 | 1.674E-3 |
|                                                              | 4s4p <sup>2</sup> 4p <sup>3</sup> D <sub>3°</sub> | 352.51 | 337.41 | 336.69 | 4.621E-2 | 3.990E-2 |
|                                                              | 4s4p <sup>2</sup> 4p <sup>3</sup> P <sub>1°</sub> | 304.72 | 295.78 |        | 3.300E-5 | 3.096E-5 |
|                                                              | 4s4p <sup>3</sup> <sup>3</sup> P <sub>2°</sub>    | 298.03 | 290.55 |        | 3.879E-3 | 6.934E-3 |
|                                                              | 4s4p <sup>2</sup> 4p <sup>3</sup> S <sub>1°</sub> | 251.21 | 256.64 |        | 3.157E-3 | 6.180E-3 |
|                                                              | 4s <sup>2</sup> 4p4d <sup>3</sup> F <sub>2°</sub> | 220.16 | 218.74 |        | 1.983E-1 |          |
|                                                              | 4s4p <sup>2</sup> 4p <sup>1</sup> D <sub>2°</sub> | 255.68 | 252.81 | 252.73 | 3.025E-2 | 1.625E-1 |
|                                                              | 4s <sup>2</sup> 4p4d <sup>3</sup> P <sub>1°</sub> | 190.36 | 193.06 |        | 3.288E-1 |          |
|                                                              | 4s <sup>2</sup> 4p4d <sup>3</sup> F <sub>3°</sub> | 208.61 | 207.09 |        | 3.470E-4 |          |
|                                                              | 4s <sup>2</sup> 4p4d <sup>3</sup> P <sub>2°</sub> | 194.60 | 197.11 |        | 4.744E-2 |          |
|                                                              | 4s4p <sup>3</sup> <sup>1</sup> P <sub>1°</sub>    | 213.76 | 217.03 | 217.46 | 2.067E-1 | 2.576E-1 |
|                                                              | 4s <sup>2</sup> 4p4d <sup>1</sup> D <sub>2°</sub> | 177.78 | 180.48 |        | 2.083E-1 |          |
|                                                              | 4s <sup>2</sup> 4p4d <sup>3</sup> D <sub>3°</sub> | 173.04 | 175.49 |        | 1.998E-1 |          |
|                                                              | 4s <sup>2</sup> 4p4d <sup>3</sup> D <sub>1°</sub> | 173.04 | 175.49 |        | 8.988E-2 |          |
|                                                              | 4s <sup>2</sup> 4p4d <sup>3</sup> D <sub>2°</sub> | 171.11 | 173.42 |        | 5.433E-1 |          |
|                                                              | 4s <sup>2</sup> 4p4d <sup>1</sup> F <sub>3°</sub> | 158.88 | 161.66 |        | 1.263    |          |
|                                                              | 4s <sup>2</sup> 4p4d <sup>1</sup> P <sub>1°</sub> | 156.30 | 158.80 |        | 2.456E-3 |          |
| 4s <sup>2</sup> 4p <sup>2</sup> <sup>1</sup> S <sub>0°</sub> | 4s4p <sup>2</sup> 4p <sup>3</sup> D <sub>1°</sub> | 471.47 | 439.04 |        | 2.834E-3 |          |
|                                                              | 4s4p <sup>2</sup> 4p <sup>3</sup> P <sub>1°</sub> | 352.39 | 335.39 |        | 2.377E-2 |          |

|                                                    |        |        |          |          |
|----------------------------------------------------|--------|--------|----------|----------|
| 4s4p <sup>2</sup> 4p̄ <sup>3</sup> S <sub>1°</sub> | 282.73 | 285.94 | 8.647E-2 | 5.495E-2 |
| 4s <sup>2</sup> 4p4d̄ <sup>3</sup> P <sub>1°</sub> | 207.97 | 209.18 | 3.427E-1 |          |
| 4s <sup>2</sup> 4p4d̄ <sup>3</sup> D <sub>1°</sub> | 187.48 | 188.71 | 6.360E-4 |          |
| 4s <sup>2</sup> 4p4d <sup>1</sup> P <sub>1°</sub>  | 167.99 | 169.55 | 2.545    |          |

**Table S11.** Cross sections (cm<sup>2</sup>) for Ge-like Te<sup>20+</sup> for the transitions from initial to final levels with respective indices '*i*' and '*f*' and at scattered electron energies 50 – 5000 eV.

| Transition |          | 50        | 100       | 150       | 200       | 400       | 600       | 800       | 1000      | 1500       | 2000      | 2500      | 3000      | 3500      | 4000      | 4500      | 5000      |
|------------|----------|-----------|-----------|-----------|-----------|-----------|-----------|-----------|-----------|------------|-----------|-----------|-----------|-----------|-----------|-----------|-----------|
| <i>i</i>   | <i>f</i> |           |           |           |           |           |           |           |           |            |           |           |           |           |           |           |           |
| 1          | 7        | 1.022E-17 | 7.354E-18 | 5.825E-18 | 4.860E-18 | 3.038E-18 | 2.278E-18 | 1.852E-18 | 1.572E-18 | 1.1635E-18 | 9.575E-19 | 8.083E-19 | 7.023E-19 | 6.226E-19 | 5.603E-19 | 5.103E-19 | 4.691E-19 |
| 1          | 11       | 9.835E-19 | 7.328E-19 | 5.917E-19 | 5.001E-19 | 3.205E-19 | 2.432E-19 | 1.991E-19 | 1.699E-19 | 1.2679E-19 | 1.043E-19 | 8.852E-20 | 7.721E-20 | 6.866E-20 | 6.196E-20 | 5.655E-20 | 5.208E-20 |
| 1          | 13       | 3.699E-18 | 2.807E-18 | 2.289E-18 | 1.949E-18 | 1.266E-18 | 9.669E-19 | 7.949E-19 | 6.804E-19 | 5.1E-19    | 4.194E-19 | 3.571E-19 | 3.122E-19 | 2.781E-19 | 2.513E-19 | 2.296E-19 | 2.117E-19 |
| 1          | 17       | 3.117E-18 | 2.431E-18 | 2.016E-18 | 1.736E-18 | 1.154E-18 | 8.922E-19 | 7.388E-19 | 6.357E-19 | 4.8012E-19 | 3.946E-19 | 3.377E-19 | 2.964E-19 | 2.648E-19 | 2.399E-19 | 2.197E-19 | 2.029E-19 |
| 1          | 19       | 1.639E-17 | 1.287E-17 | 1.072E-17 | 9.260E-18 | 6.197E-18 | 4.804E-18 | 3.985E-18 | 3.434E-18 | 2.5992E-18 | 2.125E-18 | 1.813E-18 | 1.589E-18 | 1.420E-18 | 1.287E-18 | 1.179E-18 | 1.090E-18 |
| 1          | 24       | 6.609E-20 | 5.273E-20 | 4.432E-20 | 3.853E-20 | 2.615E-20 | 2.040E-20 | 1.700E-20 | 1.469E-20 | 1.1182E-20 | 9.175E-21 | 7.847E-21 | 6.893E-21 | 6.170E-21 | 5.597E-21 | 5.135E-21 | 4.751E-21 |
| 1          | 27       | 4.687E-20 | 3.781E-20 | 3.201E-20 | 2.796E-20 | 1.916E-20 | 1.500E-20 | 1.253E-20 | 1.085E-20 | 8.2907E-21 | 6.813E-21 | 5.834E-21 | 5.132E-21 | 4.598E-21 | 4.174E-21 | 3.831E-21 | 3.547E-21 |
| 2          | 6        | 1.500E-18 | 1.008E-18 | 7.714E-19 | 6.294E-19 | 3.775E-19 | 2.775E-19 | 2.229E-19 | 1.876E-19 | 1.3688E-19 | 1.125E-19 | 9.416E-20 | 8.128E-20 | 7.170E-20 | 6.427E-20 | 5.834E-20 | 5.348E-20 |
| 2          | 7        | 4.896E-20 | 3.133E-20 | 2.264E-20 | 1.752E-20 | 8.922E-21 | 5.948E-21 | 4.495E-21 | 3.635E-21 | 2.5086E-21 | 1.989E-21 | 1.642E-21 | 1.407E-21 | 1.237E-21 | 1.108E-21 | 1.006E-21 | 9.231E-22 |
| 2          | 8        | 3.913E-18 | 2.748E-18 | 2.148E-18 | 1.777E-18 | 1.093E-18 | 8.132E-19 | 6.580E-19 | 5.566E-19 | 4.0968E-19 | 3.371E-19 | 2.836E-19 | 2.457E-19 | 2.174E-19 | 1.954E-19 | 1.777E-19 | 1.632E-19 |
| 2          | 10       | 1.218E-18 | 8.793E-19 | 6.976E-19 | 5.827E-19 | 3.650E-19 | 2.739E-19 | 2.228E-19 | 1.892E-19 | 1.4017E-19 | 1.153E-19 | 9.742E-20 | 8.467E-20 | 7.508E-20 | 6.759E-20 | 6.157E-20 | 5.661E-20 |
| 2          | 11       | 3.606E-18 | 2.614E-18 | 2.079E-18 | 1.739E-18 | 1.092E-18 | 8.212E-19 | 6.685E-19 | 5.681E-19 | 4.2112E-19 | 3.465E-19 | 2.928E-19 | 2.546E-19 | 2.259E-19 | 2.034E-19 | 1.853E-19 | 1.704E-19 |
| 2          | 12       | 7.560E-20 | 5.289E-20 | 4.079E-20 | 3.326E-20 | 1.952E-20 | 1.414E-20 | 1.126E-20 | 9.442E-21 | 6.8675E-21 | 5.585E-21 | 4.694E-21 | 4.066E-21 | 3.598E-21 | 3.253E-21 | 2.959E-21 | 2.718E-21 |
| 2          | 13       | 3.477E-18 | 2.573E-18 | 2.070E-18 | 1.744E-18 | 1.111E-18 | 8.411E-19 | 6.875E-19 | 5.860E-19 | 4.3648E-19 | 3.591E-19 | 3.044E-19 | 2.653E-19 | 2.358E-19 | 2.126E-19 | 1.940E-19 | 1.786E-19 |
| 2          | 14       | 1.035E-19 | 7.503E-20 | 5.921E-20 | 4.912E-20 | 2.999E-20 | 2.218E-20 | 1.788E-20 | 1.511E-20 | 1.1114E-20 | 9.068E-21 | 7.659E-21 | 6.657E-21 | 5.906E-21 | 5.351E-21 | 4.875E-21 | 4.484E-21 |
| 2          | 15       | 6.210E-19 | 4.654E-19 | 3.765E-19 | 3.185E-19 | 2.040E-19 | 1.546E-19 | 1.262E-19 | 1.075E-19 | 8.0011E-20 | 6.539E-20 | 5.541E-20 | 4.824E-20 | 4.284E-20 | 3.903E-20 | 3.557E-20 | 3.272E-20 |
| 2          | 17       | 1.159E-18 | 8.839E-19 | 7.230E-19 | 6.166E-19 | 4.018E-19 | 3.073E-19 | 2.529E-19 | 2.166E-19 | 1.6259E-19 | 1.337E-19 | 1.139E-19 | 9.967E-20 | 8.883E-20 | 8.030E-20 | 7.340E-20 | 6.768E-20 |
| 2          | 18       | 7.672E-18 | 5.890E-18 | 4.837E-18 | 4.139E-18 | 2.718E-18 | 2.088E-18 | 1.723E-18 | 1.478E-18 | 1.1122E-18 | 9.143E-19 | 7.803E-19 | 6.834E-19 | 6.097E-19 | 5.517E-19 | 5.047E-19 | 4.657E-19 |
| 2          | 19       | 2.060E-18 | 1.583E-18 | 1.301E-18 | 1.113E-18 | 7.314E-19 | 5.618E-19 | 4.634E-19 | 3.977E-19 | 2.9921E-19 | 2.459E-19 | 2.099E-19 | 1.838E-19 | 1.640E-19 | 1.484E-19 | 1.358E-19 | 1.253E-19 |
| 2          | 21       | 5.289E-18 | 4.137E-18 | 3.435E-18 | 2.962E-18 | 1.975E-18 | 1.528E-18 | 1.266E-18 | 1.090E-18 | 8.2447E-19 | 6.776E-19 | 5.803E-19 | 5.095E-19 | 4.554E-19 | 4.127E-19 | 3.780E-19 | 3.492E-19 |
| 2          | 22       | 1.737E-18 | 1.361E-18 | 1.131E-18 | 9.760E-19 | 6.516E-19 | 5.045E-19 | 4.183E-19 | 3.602E-19 | 2.7244E-19 | 2.239E-19 | 1.918E-19 | 1.684E-19 | 1.505E-19 | 1.364E-19 | 1.250E-19 | 1.154E-19 |
| 2          | 24       | 3.510E-18 | 2.755E-18 | 2.293E-18 | 1.981E-18 | 1.325E-18 | 1.027E-18 | 8.521E-19 | 7.342E-19 | 5.5561E-19 | 4.543E-19 | 3.876E-19 | 3.397E-19 | 3.036E-19 | 2.750E-19 | 2.521E-19 | 2.330E-19 |
| 2          | 25       | 1.133E-19 | 8.971E-20 | 7.495E-20 | 6.485E-20 | 4.352E-20 | 3.377E-20 | 2.806E-20 | 2.421E-20 | 1.8376E-20 | 1.506E-20 | 1.287E-20 | 1.130E-20 | 1.011E-20 | 9.170E-21 | 8.412E-21 | 7.781E-21 |
| 2          | 27       | 1.133E-19 | 8.971E-20 | 7.495E-20 | 6.485E-20 | 4.352E-20 | 3.377E-20 | 2.806E-20 | 2.421E-20 | 1.8376E-20 | 1.506E-20 | 1.287E-20 | 1.130E-20 | 1.011E-20 | 9.170E-21 | 8.412E-21 | 7.781E-21 |
| 3          | 6        | 7.214E-19 | 4.792E-19 | 3.643E-19 | 2.960E-19 | 1.761E-19 | 1.289E-19 | 1.033E-19 | 8.684E-20 | 6.3182E-20 | 5.190E-20 | 4.337E-20 | 3.740E-20 | 3.297E-20 | 2.954E-20 | 2.680E-20 | 2.456E-20 |
| 3          | 7        | 5.788E-19 | 3.991E-19 | 3.090E-19 | 2.541E-19 | 1.544E-19 | 1.143E-19 | 9.216E-20 | 7.777E-20 | 5.7007E-20 | 4.685E-20 | 3.933E-20 | 3.402E-20 | 3.007E-20 | 2.700E-20 | 2.454E-20 | 2.252E-20 |
| 3          | 8        | 1.170E-19 | 7.965E-20 | 6.084E-20 | 4.942E-20 | 2.903E-20 | 2.108E-20 | 1.682E-20 | 1.410E-20 | 1.0246E-20 | 8.375E-21 | 7.016E-21 | 6.063E-21 | 5.355E-21 | 4.813E-21 | 4.374E-21 | 4.013E-21 |
| 3          | 9        | 1.775E-18 | 1.247E-18 | 9.744E-19 | 8.053E-19 | 4.935E-19 | 3.665E-19 | 2.963E-19 | 2.505E-19 | 1.8429E-19 | 1.515E-19 | 1.275E-19 | 1.105E-19 | 9.781E-20 | 8.790E-20 | 7.996E-20 | 7.343E-20 |
| 3          | 11       | 1.474E-19 | 1.053E-19 | 8.290E-20 | 6.882E-20 | 4.246E-20 | 3.162E-20 | 2.561E-20 | 2.169E-20 | 1.6E-20    | 1.314E-20 | 1.108E-20 | 9.627E-21 | 8.532E-21 | 7.681E-21 | 6.994E-21 | 6.429E-21 |
| 3          | 12       | 4.602E-18 | 3.320E-18 | 2.633E-18 | 2.199E-18 | 1.376E-18 | 1.032E-18 | 8.397E-19 | 7.130E-19 | 5.2792E-19 | 4.344E-19 | 3.668E-19 | 3.188E-19 | 2.827E-19 | 2.545E-19 | 2.318E-19 | 2.131E-19 |
| 3          | 13       | 6.371E-18 | 4.690E-18 | 3.761E-18 | 3.165E-18 | 2.010E-18 | 1.518E-18 | 1.240E-18 | 1.056E-18 | 7.8588E-19 | 6.466E-19 | 5.477E-19 | 4.770E-19 | 4.237E-19 | 3.820E-19 | 3.483E-19 | 3.206E-19 |
| 3          | 14       | 4.955E-20 | 3.485E-20 | 2.685E-20 | 2.184E-20 | 1.262E-20 | 8.999E-21 | 7.053E-21 | 5.838E-21 | 4.1568E-21 | 3.298E-21 | 2.731E-21 | 2.335E-21 | 2.042E-21 | 1.921E-21 | 1.731E-21 | 1.576E-21 |
| 3          | 15       | 1.459E-18 | 1.090E-18 | 8.814E-19 | 7.454E-19 | 4.780E-19 | 3.628E-19 | 2.971E-19 | 2.536E-19 | 1.8937E-19 | 1.556E-19 | 1.321E-19 | 1.153E-19 | 1.026E-19 | 9.268E-20 | 8.461E-20 | 7.795E-20 |
| 3          | 16       | 2.134E-18 | 1.612E-18 | 1.311E-18 | 1.114E-18 | 7.220E-19 | 5.508E-19 | 4.525E-19 | 3.870E-19 | 2.8987E-19 | 2.380E-19 | 2.026E-19 | 1.771E-19 | 1.577E-19 | 1.427E-19 | 1.304E-19 | 1.202E-19 |
| 3          | 17       | 2.204E-20 | 1.601E-20 | 1.258E-20 | 1.038E-20 | 6.207E-21 | 4.514E-21 | 3.587E-21 | 2.997E-21 | 2.1663E-21 | 1.731E-21 | 1.448E-21 | 1.248E-21 | 1.100E-21 | 1.023E-21 | 9.275E-22 | 8.492E-22 |
| 3          | 18       | 3.189E-18 | 2.431E-18 | 1.989E-18 | 1.696E-18 | 1.106E-18 | 8.468E-19 | 6.970E-19 | 5.971E-19 | 4.4812E-19 | 3.683E-19 | 3.138E-19 | 2.746E-19 | 2.447E-19 | 2.214E-19 | 2.034E-19 | 1.866E-19 |
| 3          | 19       | 1.078E-19 | 8.098E-20 | 6.536E-20 | 5.513E-20 | 3.488E-20 | 2.621E-20 | 2.128E-20 | 1.805E-20 | 1.3352E-20 | 1.083E-20 | 9.164E-21 | 7.964E-21 | 7.062E-21 | 6.483E-21 | 5.901E-21 | 5.422E-21 |
| 3          | 21       | 3.412E-18 | 2.654E-18 | 2.196E-18 | 1.889E-18 | 1.252E-18 | 9.665E-19 | 7.996E-19 | 6.876E-19 | 5.1886E-19 | 4.265E-19 | 3.648E-19 | 3.200E-19 | 2.858E-19 | 2.589E-19 | 2.370E-19 | 2.188E-19 |
| 3          | 23       | 9.631E-18 | 7.529E-18 | 6.249E-18 | 5.388E-18 | 3.591E-18 | 2.779E-18 | 2.303E-18 | 1.983E-18 | 1.4989E-18 | 1.232E-18 | 1.054E-18 | 9.261E-19 | 8.279E-19 | 7.503E-19 | 6.871E-19 | 6.348E-19 |
| 3          | 24       | 7.006E-19 | 5.468E-19 | 4.533E-19 | 3.904E-19 | 2.595E-19 | 2.005E-19 | 1.660E-19 | 1.428E-19 | 1.0789E-19 | 8.863E-20 | 7.586E-20 | 6.658E-20 | 5.950E-20 | 5.393E-20 | 4.939E-20 | 4.561E-20 |
| 3          | 25       | 7.960E-19 | 6.230E-19 | 5.173E-19 | 4.460E-19 | 2.971E-19 | 2.298E-19 | 1.903E-19 | 1.637E-19 | 1.237E-19  | 1.015E-19 | 8.691E-20 | 7.629E-20 | 6.818E-20 | 6.190E-20 | 5.668E-20 | 5.235E-20 |
| 3          | 26       | 1.454E-18 | 1.150E-18 | 9.620E-19 | 8.333E-19 | 5.612E-19 | 4.363E-19 | 3.625E-19 | 3.127E-19 | 2.371E-19  | 1.941E-19 | 1.657E-19 | 1.454E-19 | 1.300E-19 | 1.178E-19 | 1.080E-19 | 9.987E-20 |
| 3          | 27       | 3.186E-20 | 2.433E-20 | 1.976E-20 | 1.669E-20 | 1.047E-20 | 7.753E-21 | 6.198E-21 | 5.187E-21 | 3.745E-21  | 2.969E-21 | 2.465E-21 | 2.110E-21 | 1.846E-21 | 1.641E-21 | 1.480E-21 | 1.349E-21 |
| 4          | 6        | 9.534E-20 | 5.983E-20 | 4.430E-20 | 3.547E-20 | 2.055E-20 | 1.486E-20 | 1.182E-20 | 9.877E-21 | 7.110E-21  | 5.831E-21 | 4.843E-21 | 4.158E-21 | 3.652E-21 | 3.263E-21 | 2.954E-21 | 2.701E-21 |
| 4          | 7        | 2.319E-19 | 1.524E-19 | 1.154E-19 | 9.360E-20 | 5.552E-20 | 4.061E-20 | 3.252E-20 | 2.731E-20 | 1.984E-20  | 1.629E-20 | 1.360E-20 | 1.172E-20 | 1.032E-20 | 9.250E-21 | 8.389E-21 | 7.684E-21 |



|   |    |           |           |           |           |           |           |           |           |           |           |           |           |            |           |           |           |
|---|----|-----------|-----------|-----------|-----------|-----------|-----------|-----------|-----------|-----------|-----------|-----------|-----------|------------|-----------|-----------|-----------|
| 4 | 8  | 2.108E-19 | 1.384E-19 | 1.042E-19 | 8.411E-20 | 4.906E-20 | 3.557E-20 | 2.834E-20 | 2.373E-20 | 1.717E-20 | 1.408E-20 | 1.174E-20 | 1.012E-20 | 8.917E-21  | 7.987E-21 | 7.244E-21 | 6.637E-21 |
| 4 | 9  | 2.820E-18 | 1.905E-18 | 1.461E-18 | 1.194E-18 | 7.191E-19 | 5.297E-19 | 4.260E-19 | 3.588E-19 | 2.620E-19 | 2.155E-19 | 1.804E-19 | 1.558E-19 | 1.375E-19  | 1.232E-19 | 1.119E-19 | 1.026E-19 |
| 4 | 11 | 3.655E-20 | 2.419E-20 | 1.808E-20 | 1.443E-20 | 8.090E-21 | 5.729E-21 | 4.501E-21 | 3.736E-21 | 2.678E-21 | 2.170E-21 | 1.811E-21 | 1.561E-21 | 1.377E-21  | 1.236E-21 | 1.123E-21 | 1.031E-21 |
| 4 | 12 | 5.640E-19 | 3.893E-19 | 3.012E-19 | 2.473E-19 | 1.496E-19 | 1.104E-19 | 8.889E-20 | 7.494E-20 | 5.488E-20 | 4.505E-20 | 3.781E-20 | 3.271E-20 | 2.891E-20  | 2.599E-20 | 2.362E-20 | 2.167E-20 |
| 4 | 13 | 2.828E-19 | 2.006E-19 | 1.576E-19 | 1.308E-19 | 8.083E-20 | 6.026E-20 | 4.882E-20 | 4.133E-20 | 3.047E-20 | 2.506E-20 | 2.110E-20 | 1.830E-20 | 1.621E-20  | 1.458E-20 | 1.327E-20 | 1.219E-20 |
| 4 | 14 | 3.572E-18 | 2.551E-18 | 2.012E-18 | 1.674E-18 | 1.040E-18 | 7.776E-19 | 6.310E-19 | 5.349E-19 | 3.951E-19 | 3.251E-19 | 2.741E-19 | 2.380E-19 | 2.108E-19  | 1.896E-19 | 1.726E-19 | 1.586E-19 |
| 4 | 15 | 1.402E-18 | 1.015E-18 | 8.069E-19 | 6.745E-19 | 4.229E-19 | 3.175E-19 | 2.583E-19 | 2.194E-19 | 1.625E-19 | 1.337E-19 | 1.129E-19 | 9.821E-20 | 8.712E-20  | 7.846E-20 | 7.148E-20 | 6.574E-20 |
| 4 | 16 | 6.428E-20 | 4.540E-20 | 3.522E-20 | 2.884E-20 | 1.706E-20 | 1.239E-20 | 9.861E-21 | 8.258E-21 | 5.993E-21 | 4.844E-21 | 4.059E-21 | 3.505E-21 | 3.092E-21  | 2.831E-21 | 2.569E-21 | 2.354E-21 |
| 4 | 17 | 4.914E-18 | 3.621E-18 | 2.906E-18 | 2.445E-18 | 1.554E-18 | 1.174E-18 | 9.591E-19 | 8.170E-19 | 6.079E-19 | 5.001E-19 | 4.237E-19 | 3.691E-19 | 3.279E-19  | 2.956E-19 | 2.696E-19 | 2.482E-19 |
| 4 | 18 | 5.535E-19 | 4.100E-19 | 3.300E-19 | 2.782E-19 | 1.774E-19 | 1.342E-19 | 1.097E-19 | 9.356E-20 | 6.968E-20 | 5.732E-20 | 4.859E-20 | 4.235E-20 | 3.763E-20  | 3.395E-20 | 3.097E-20 | 2.851E-20 |
| 4 | 19 | 9.835E-19 | 7.310E-19 | 5.893E-19 | 4.976E-19 | 3.181E-19 | 2.411E-19 | 1.972E-19 | 1.682E-19 | 1.254E-19 | 1.032E-19 | 8.755E-20 | 7.634E-20 | 6.787E-20  | 6.124E-20 | 5.588E-20 | 5.145E-20 |
| 4 | 21 | 1.381E-18 | 1.043E-18 | 8.486E-19 | 7.206E-19 | 4.651E-19 | 3.539E-19 | 2.902E-19 | 2.479E-19 | 1.852E-19 | 1.520E-19 | 1.292E-19 | 1.128E-19 | 1.003E-19  | 9.096E-20 | 8.304E-20 | 7.650E-20 |
| 4 | 23 | 2.006E-18 | 1.524E-18 | 1.244E-18 | 1.059E-18 | 6.888E-19 | 5.263E-19 | 4.326E-19 | 3.703E-19 | 2.775E-19 | 2.279E-19 | 1.941E-19 | 1.697E-19 | 1.512E-19  | 1.369E-19 | 1.251E-19 | 1.153E-19 |
| 4 | 24 | 1.407E-18 | 1.071E-18 | 8.755E-19 | 7.463E-19 | 4.864E-19 | 3.722E-19 | 3.063E-19 | 2.624E-19 | 1.969E-19 | 1.618E-19 | 1.379E-19 | 1.206E-19 | 1.075E-19  | 9.727E-20 | 8.892E-20 | 8.202E-20 |
| 4 | 25 | 7.191E-18 | 5.501E-18 | 4.508E-18 | 3.851E-18 | 2.521E-18 | 1.933E-18 | 1.593E-18 | 1.366E-18 | 1.026E-18 | 8.441E-19 | 7.198E-19 | 6.301E-19 | 5.620E-19  | 5.083E-19 | 4.648E-19 | 4.288E-19 |
| 4 | 26 | 1.181E-17 | 9.149E-18 | 7.555E-18 | 6.488E-18 | 4.295E-18 | 3.312E-18 | 2.739E-18 | 2.354E-18 | 1.775E-18 | 1.459E-18 | 1.247E-18 | 1.093E-18 | 9.770E-19  | 8.847E-19 | 8.098E-19 | 7.477E-19 |
| 4 | 27 | 9.098E-20 | 6.892E-20 | 5.585E-20 | 4.719E-20 | 2.980E-20 | 2.222E-20 | 1.787E-20 | 1.504E-20 | 1.095E-20 | 8.768E-21 | 7.322E-21 | 6.294E-21 | 5.5274E-21 | 5.202E-21 | 4.697E-21 | 4.286E-21 |
| 5 | 7  | 2.587E-19 | 1.659E-19 | 1.242E-19 | 1.001E-19 | 5.884E-20 | 4.285E-20 | 3.423E-20 | 2.868E-20 | 2.075E-20 | 1.705E-20 | 1.419E-20 | 1.220E-20 | 1.073E-20  | 9.597E-21 | 8.692E-21 | 7.954E-21 |
| 5 | 11 | 1.834E-18 | 1.239E-18 | 9.501E-19 | 7.760E-19 | 4.658E-19 | 3.426E-19 | 2.753E-19 | 2.317E-19 | 1.691E-19 | 1.390E-19 | 1.164E-19 | 1.005E-19 | 8.872E-20  | 7.957E-20 | 7.225E-20 | 6.625E-20 |
| 5 | 13 | 2.963E-18 | 2.066E-18 | 1.610E-18 | 1.329E-18 | 8.142E-19 | 6.048E-19 | 4.888E-19 | 4.132E-19 | 3.036E-19 | 2.499E-19 | 2.100E-19 | 1.818E-19 | 1.608E-19  | 1.444E-19 | 1.313E-19 | 1.205E-19 |
| 5 | 17 | 6.867E-18 | 4.980E-18 | 3.961E-18 | 3.314E-18 | 2.081E-18 | 1.564E-18 | 1.273E-18 | 1.082E-18 | 8.021E-19 | 6.602E-19 | 5.578E-19 | 4.850E-19 | 4.302E-19  | 3.874E-19 | 3.529E-19 | 3.245E-19 |
| 5 | 19 | 2.845E-19 | 2.078E-19 | 1.658E-19 | 1.389E-19 | 8.735E-20 | 6.565E-20 | 5.345E-20 | 4.544E-20 | 3.370E-20 | 2.775E-20 | 2.346E-20 | 2.040E-20 | 1.810E-20  | 1.630E-20 | 1.484E-20 | 1.365E-20 |
| 5 | 24 | 7.162E-20 | 5.114E-20 | 3.981E-20 | 3.264E-20 | 1.926E-20 | 1.399E-20 | 1.118E-20 | 9.405E-21 | 6.889E-21 | 5.602E-21 | 4.735E-21 | 4.121E-21 | 3.660E-21  | 3.299E-21 | 3.009E-21 | 2.770E-21 |
| 5 | 27 | 2.654E-17 | 2.038E-17 | 1.674E-17 | 1.432E-17 | 9.411E-18 | 7.230E-18 | 5.965E-18 | 5.118E-18 | 3.850E-18 | 3.165E-18 | 2.701E-18 | 2.366E-18 | 2.111E-18  | 1.910E-18 | 1.747E-18 | 1.612E-18 |

**Table S12.** Cross sections (cm<sup>2</sup>) for Ge-like Sb<sup>19+</sup> for the transitions from initial to final levels with respective indices '*i*' and '*f*' and at scattered electron energies 50 – 5000 eV.

| Transition |          | 50        | 100       | 150       | 200       | 400       | 600       | 800       | 1000      | 1500      | 2000      | 2500      | 3000      | 3500      | 4000      | 4500      | 5000      |
|------------|----------|-----------|-----------|-----------|-----------|-----------|-----------|-----------|-----------|-----------|-----------|-----------|-----------|-----------|-----------|-----------|-----------|
| <i>i</i>   | <i>f</i> |           |           |           |           |           |           |           |           |           |           |           |           |           |           |           |           |
| 1          | 7        | 1.092E+03 | 7.798E-18 | 6.153E-18 | 5.123E-18 | 3.193E-18 | 2.391E-18 | 1.942E-18 | 1.648E-18 | 1.218E-18 | 1.002E-18 | 8.454E-19 | 7.339E-19 | 6.502E-19 | 5.85E-19  | 5.325E-19 | 4.894E-19 |
| 1          | 11       | 1.113E-18 | 8.216E-19 | 6.604E-19 | 5.566E-19 | 3.552E-19 | 2.690E-19 | 2.200E-19 | 1.876E-19 | 1.398E-19 | 1.150E-19 | 9.750E-20 | 8.496E-20 | 7.550E-20 | 6.808E-20 | 6.211E-20 | 5.718E-20 |
| 1          | 13       | 4.190E-18 | 3.154E-18 | 2.563E-18 | 2.177E-18 | 1.409E-18 | 1.075E-18 | 8.831E-19 | 7.555E-19 | 5.658E-19 | 4.654E-19 | 3.958E-19 | 3.457E-19 | 3.077E-19 | 2.779E-19 | 2.538E-19 | 2.339E-19 |
| 1          | 17       | 2.135E-18 | 1.651E-18 | 1.363E-18 | 1.170E-18 | 1.170E-18 | 5.980E-19 | 4.945E-19 | 4.251E-19 | 3.207E-19 | 2.638E-19 | 2.254E-19 | 1.976E-19 | 1.764E-19 | 1.597E-19 | 1.461E-19 | 1.349E-19 |
| 1          | 19       | 1.943E-17 | 1.517E-17 | 1.259E-17 | 1.086E-17 | 7.256E-18 | 5.624E-18 | 4.663E-18 | 4.017E-18 | 3.039E-18 | 2.499E-18 | 2.140E-18 | 1.878E-18 | 1.679E-18 | 1.521E-18 | 1.393E-18 | 1.287E-18 |
| 1          | 23       | 9.482E-20 | 7.515E-20 | 6.296E-20 | 5.465E-20 | 3.696E-20 | 2.883E-20 | 2.400E-20 | 2.074E-20 | 1.577E-20 | 1.293E-20 | 1.106E-20 | 9.708E-21 | 8.686E-21 | 7.875E-21 | 7.221E-21 | 6.677E-21 |
| 1          | 27       | 5.564E-20 | 4.459E-20 | 3.761E-20 | 3.280E-20 | 2.239E-20 | 1.752E-20 | 1.462E-20 | 1.266E-20 | 9.661E-21 | 7.933E-21 | 6.795E-21 | 5.970E-21 | 5.347E-21 | 4.852E-21 | 4.452E-21 | 4.118E-21 |
| 2          | 6        | 1.422E-18 | 9.492E-19 | 7.237E-19 | 5.896E-19 | 3.526E-19 | 2.589E-19 | 2.079E-19 | 1.749E-19 | 1.275E-19 | 1.046E-19 | 8.751E-20 | 7.551E-20 | 6.658E-20 | 5.967E-20 | 5.415E-20 | 4.963E-20 |
| 2          | 7        | 3.788E-20 | 2.295E-20 | 1.577E-20 | 1.165E-20 | 5.070E-21 | 3.017E-21 | 2.103E-21 | 1.603E-21 | 1.007E-21 | 7.534E-22 | 6.026E-22 | 5.074E-22 | 4.420E-22 | 3.937E-22 | 3.563E-22 | 3.263E-22 |
| 2          | 8        | 4.479E-18 | 3.122E-18 | 2.433E-18 | 2.010E-18 | 1.233E-18 | 9.168E-19 | 7.415E-19 | 6.271E-19 | 4.612E-19 | 3.791E-19 | 3.187E-19 | 2.760E-19 | 2.441E-19 | 2.193E-19 | 1.994E-19 | 1.830E-19 |
| 2          | 10       | 1.334E-18 | 9.561E-19 | 7.560E-19 | 6.302E-19 | 3.938E-19 | 2.953E-19 | 2.401E-19 | 2.038E-19 | 1.508E-19 | 1.240E-19 | 1.046E-19 | 9.091E-20 | 8.057E-20 | 7.251E-20 | 6.602E-20 | 6.069E-20 |
| 2          | 11       | 3.837E-18 | 2.760E-18 | 2.187E-18 | 1.826E-18 | 1.144E-18 | 8.590E-19 | 6.989E-19 | 5.936E-19 | 4.396E-19 | 3.616E-19 | 3.053E-19 | 2.653E-19 | 2.352E-19 | 2.117E-19 | 1.928E-19 | 1.773E-19 |
| 2          | 12       | 6.119E-20 | 4.186E-20 | 3.177E-20 | 2.559E-20 | 1.457E-20 | 1.039E-20 | 8.210E-21 | 6.843E-21 | 4.940E-21 | 4.000E-21 | 3.352E-21 | 2.899E-21 | 2.561E-21 | 2.316E-21 | 2.106E-21 | 1.933E-21 |
| 2          | 13       | 3.889E-18 | 2.860E-18 | 2.294E-18 | 1.931E-18 | 1.228E-18 | 9.288E-19 | 7.590E-19 | 6.468E-19 | 4.815E-19 | 3.960E-19 | 3.355E-19 | 2.922E-19 | 2.596E-19 | 2.340E-19 | 2.134E-19 | 1.964E-19 |
| 2          | 14       | 1.414E-19 | 1.020E-19 | 8.043E-20 | 6.675E-20 | 4.096E-20 | 3.043E-20 | 2.461E-20 | 2.083E-20 | 1.537E-20 | 1.258E-20 | 1.063E-20 | 9.250E-21 | 8.210E-21 | 7.417E-21 | 6.761E-21 | 6.221E-21 |
| 2          | 15       | 5.943E-19 | 4.424E-19 | 3.567E-19 | 3.011E-19 | 1.922E-19 | 1.453E-19 | 1.185E-19 | 1.008E-19 | 7.493E-20 | 6.115E-20 | 5.172E-20 | 4.498E-20 | 3.989E-20 | 3.639E-20 | 3.314E-20 | 3.046E-20 |
| 2          | 17       | 1.644E-18 | 1.245E-18 | 1.015E-18 | 8.640E-19 | 5.616E-19 | 4.293E-19 | 3.531E-19 | 3.023E-19 | 2.267E-19 | 1.865E-19 | 1.587E-19 | 1.387E-19 | 1.236E-19 | 1.117E-19 | 1.020E-19 | 9.408E-20 |

|   |    |           |           |           |           |           |           |           |           |           |           |           |           |           |           |           |           |
|---|----|-----------|-----------|-----------|-----------|-----------|-----------|-----------|-----------|-----------|-----------|-----------|-----------|-----------|-----------|-----------|-----------|
| 2 | 18 | 8.219E-18 | 6.281E-18 | 5.150E-18 | 4.401E-18 | 2.889E-18 | 2.220E-18 | 1.831E-18 | 1.571E-18 | 1.182E-18 | 9.720E-19 | 8.290E-19 | 7.257E-19 | 6.473E-19 | 5.855E-19 | 5.355E-19 | 4.940E-19 |
| 2 | 19 | 1.834E-18 | 1.403E-18 | 1.151E-18 | 9.840E-19 | 6.455E-19 | 4.959E-19 | 4.090E-19 | 3.509E-19 | 2.641E-19 | 2.171E-19 | 1.852E-19 | 1.621E-19 | 1.446E-19 | 1.308E-19 | 1.196E-19 | 1.104E-19 |
| 2 | 21 | 5.813E-18 | 4.521E-18 | 3.745E-18 | 3.225E-18 | 2.146E-18 | 1.661E-18 | 1.375E-18 | 1.184E-18 | 8.951E-19 | 7.361E-19 | 6.298E-19 | 5.526E-19 | 4.937E-19 | 4.472E-19 | 4.095E-19 | 3.781E-19 |
| 2 | 22 | 1.913E-18 | 1.490E-18 | 1.236E-18 | 1.065E-18 | 7.096E-19 | 5.494E-19 | 4.553E-19 | 3.920E-19 | 2.964E-19 | 2.437E-19 | 2.086E-19 | 1.830E-19 | 1.635E-19 | 1.481E-19 | 1.356E-19 | 1.253E-19 |
| 2 | 23 | 3.960E-18 | 3.092E-18 | 2.567E-18 | 2.213E-18 | 1.478E-18 | 1.145E-18 | 9.498E-19 | 8.181E-19 | 6.190E-19 | 5.091E-19 | 4.358E-19 | 3.826E-19 | 3.420E-19 | 3.098E-19 | 2.838E-19 | 2.621E-19 |
| 2 | 25 | 1.431E-18 | 1.119E-18 | 9.301E-19 | 8.026E-19 | 5.363E-19 | 4.158E-19 | 3.448E-19 | 2.971E-19 | 2.249E-19 | 1.848E-19 | 1.583E-19 | 1.390E-19 | 1.242E-19 | 1.126E-19 | 1.032E-19 | 9.534E-20 |
| 2 | 27 | 1.220E-19 | 9.599E-20 | 7.996E-20 | 6.909E-20 | 4.624E-20 | 3.589E-20 | 2.981E-20 | 2.571E-20 | 1.951E-20 | 1.599E-20 | 1.367E-20 | 1.199E-20 | 1.072E-20 | 9.724E-21 | 8.917E-21 | 8.244E-21 |
| 3 | 6  | 6.967E-19 | 4.594E-19 | 3.480E-19 | 2.823E-19 | 1.674E-19 | 1.225E-19 | 9.812E-20 | 8.240E-20 | 5.991E-20 | 4.912E-20 | 4.103E-20 | 3.537E-20 | 3.117E-20 | 2.792E-20 | 2.532E-20 | 2.320E-20 |
| 3 | 7  | 5.336E-19 | 3.656E-19 | 2.823E-19 | 2.318E-19 | 1.406E-19 | 1.039E-19 | 8.377E-20 | 7.067E-20 | 5.177E-20 | 4.250E-20 | 3.565E-20 | 3.083E-20 | 2.724E-20 | 2.446E-20 | 2.222E-20 | 2.039E-20 |
| 3 | 8  | 1.264E-19 | 8.522E-20 | 6.476E-20 | 5.243E-20 | 3.063E-20 | 2.221E-20 | 1.770E-20 | 1.483E-20 | 1.077E-20 | 8.794E-21 | 7.361E-21 | 6.359E-21 | 5.614E-21 | 5.045E-21 | 4.583E-21 | 4.205E-21 |
| 3 | 9  | 2.033E-18 | 1.417E-18 | 1.103E-18 | 9.104E-19 | 5.565E-19 | 4.129E-19 | 3.337E-19 | 2.820E-19 | 2.073E-19 | 1.703E-19 | 1.432E-19 | 1.240E-19 | 1.097E-19 | 9.857E-20 | 8.963E-20 | 8.230E-20 |
| 3 | 11 | 1.706E-19 | 1.209E-19 | 9.484E-20 | 7.857E-20 | 4.836E-20 | 3.599E-20 | 2.914E-20 | 2.467E-20 | 1.819E-20 | 1.493E-20 | 1.259E-20 | 1.092E-20 | 9.678E-21 | 8.709E-21 | 7.927E-21 | 7.285E-21 |
| 3 | 12 | 5.047E-18 | 3.614E-18 | 2.857E-18 | 2.381E-18 | 1.486E-18 | 1.114E-18 | 9.056E-19 | 7.686E-19 | 5.686E-19 | 5.686E-19 | 3.946E-19 | 3.427E-19 | 3.037E-19 | 2.733E-19 | 2.488E-19 | 2.287E-19 |
| 3 | 13 | 7.073E-18 | 5.174E-18 | 4.139E-18 | 3.477E-18 | 2.204E-18 | 1.664E-18 | 1.358E-18 | 1.157E-18 | 8.604E-19 | 7.077E-19 | 5.990E-19 | 5.214E-19 | 4.629E-19 | 4.172E-19 | 3.803E-19 | 3.500E-19 |
| 3 | 14 | 1.409E-19 | 1.012E-19 | 7.975E-20 | 6.614E-20 | 4.051E-20 | 3.000E-20 | 2.418E-20 | 2.042E-20 | 1.499E-20 | 1.221E-20 | 1.027E-20 | 8.902E-21 | 7.871E-21 | 7.169E-21 | 6.514E-21 | 5.977E-21 |
| 3 | 15 | 1.434E-18 | 1.065E-18 | 8.592E-19 | 7.255E-19 | 4.643E-19 | 3.523E-19 | 2.884E-19 | 2.461E-19 | 1.837E-19 | 1.509E-19 | 1.281E-19 | 1.117E-19 | 9.937E-20 | 8.973E-20 | 8.189E-20 | 7.543E-20 |
| 3 | 16 | 2.099E-18 | 1.577E-18 | 1.280E-18 | 1.086E-18 | 7.023E-19 | 5.357E-19 | 4.398E-19 | 3.761E-19 | 2.817E-19 | 2.313E-19 | 1.967E-19 | 1.718E-19 | 1.530E-19 | 1.384E-19 | 1.264E-19 | 1.165E-19 |
| 3 | 17 | 1.285E-20 | 8.874E-21 | 6.687E-21 | 5.324E-21 | 2.876E-21 | 1.964E-21 | 1.495E-21 | 1.212E-21 | 8.367E-22 | 6.461E-22 | 5.280E-22 | 4.475E-22 | 3.889E-22 | 3.706E-22 | 3.328E-22 | 3.021E-22 |
| 3 | 18 | 3.522E-18 | 2.673E-18 | 2.182E-18 | 1.859E-18 | 1.211E-18 | 9.275E-19 | 7.633E-19 | 6.538E-19 | 4.907E-19 | 4.034E-19 | 3.436E-19 | 3.004E-19 | 2.677E-19 | 2.421E-19 | 2.212E-19 | 2.040E-19 |
| 3 | 19 | 1.315E-19 | 9.831E-20 | 7.921E-20 | 6.675E-20 | 4.224E-20 | 3.178E-20 | 2.581E-20 | 2.191E-20 | 1.623E-20 | 1.318E-20 | 1.114E-20 | 9.681E-21 | 8.582E-21 | 7.870E-21 | 7.164E-21 | 6.582E-21 |
| 3 | 21 | 3.565E-18 | 2.757E-18 | 2.275E-18 | 1.954E-18 | 1.293E-18 | 9.974E-19 | 8.246E-19 | 7.089E-19 | 5.348E-19 | 4.398E-19 | 3.758E-19 | 3.294E-19 | 2.941E-19 | 2.663E-19 | 2.437E-19 | 2.249E-19 |
| 3 | 23 | 7.969E-19 | 6.183E-19 | 5.113E-19 | 4.397E-19 | 2.917E-19 | 2.253E-19 | 1.864E-19 | 1.604E-19 | 1.211E-19 | 9.956E-20 | 8.513E-20 | 7.466E-20 | 6.669E-20 | 6.042E-20 | 5.531E-20 | 5.107E-20 |
| 3 | 24 | 1.067E-17 | 8.297E-18 | 6.872E-18 | 5.915E-18 | 3.936E-18 | 3.046E-18 | 2.523E-18 | 2.171E-18 | 1.641E-18 | 1.350E-18 | 1.154E-18 | 1.013E-18 | 9.053E-19 | 8.201E-19 | 7.508E-19 | 6.934E-19 |
| 3 | 25 | 1.040E-18 | 8.095E-19 | 6.706E-19 | 5.773E-19 | 3.840E-19 | 2.970E-19 | 2.458E-19 | 2.115E-19 | 1.598E-19 | 1.312E-19 | 1.122E-19 | 9.850E-20 | 8.799E-20 | 7.983E-20 | 7.308E-20 | 6.748E-20 |
| 3 | 26 | 1.679E-18 | 1.322E-18 | 1.102E-18 | 9.542E-19 | 6.414E-19 | 4.987E-19 | 4.142E-19 | 3.572E-19 | 2.708E-19 | 2.219E-19 | 1.894E-19 | 1.660E-19 | 1.483E-19 | 1.344E-19 | 1.231E-19 | 1.138E-19 |
| 3 | 27 | 3.520E-20 | 2.665E-20 | 2.154E-20 | 1.813E-20 | 1.130E-20 | 8.356E-21 | 6.668E-21 | 5.578E-21 | 4.027E-21 | 3.187E-21 | 2.642E-21 | 2.258E-21 | 1.974E-21 | 1.755E-21 | 1.582E-21 | 1.440E-21 |
| 4 | 6  | 1.004E-19 | 6.279E-20 | 4.642E-20 | 3.715E-20 | 2.148E-20 | 1.552E-20 | 1.234E-20 | 1.031E-20 | 7.424E-21 | 6.073E-21 | 5.043E-21 | 4.330E-21 | 3.803E-21 | 3.398E-21 | 3.076E-21 | 2.813E-21 |
| 4 | 7  | 2.541E-19 | 1.666E-19 | 1.260E-19 | 1.021E-19 | 6.057E-20 | 4.430E-20 | 3.548E-20 | 2.979E-20 | 2.164E-20 | 1.775E-20 | 1.481E-20 | 1.276E-20 | 1.124E-20 | 1.007E-20 | 9.134E-21 | 8.368E-21 |
| 4 | 8  | 2.053E-19 | 1.339E-19 | 1.004E-19 | 8.084E-20 | 4.692E-20 | 3.395E-20 | 2.703E-20 | 2.261E-20 | 1.636E-20 | 1.338E-20 | 1.116E-20 | 9.616E-21 | 8.469E-21 | 7.585E-21 | 6.879E-21 | 6.301E-21 |
| 4 | 9  | 2.948E-18 | 1.981E-18 | 1.516E-18 | 1.238E-18 | 7.447E-19 | 5.483E-19 | 4.409E-19 | 3.713E-19 | 2.711E-19 | 2.226E-19 | 1.863E-19 | 1.608E-19 | 1.418E-19 | 1.272E-19 | 1.154E-19 | 1.058E-19 |
| 4 | 11 | 2.532E-20 | 1.611E-20 | 1.165E-20 | 9.044E-21 | 4.689E-21 | 3.177E-21 | 2.430E-21 | 1.982E-21 | 1.386E-21 | 1.107E-21 | 9.170E-22 | 7.877E-22 | 6.936E-22 | 6.224E-22 | 5.651E-22 | 5.183E-22 |
| 4 | 12 | 4.922E-19 | 3.370E-19 | 2.596E-19 | 2.126E-19 | 1.279E-19 | 9.417E-20 | 7.573E-20 | 6.379E-20 | 4.666E-20 | 3.823E-20 | 3.207E-20 | 2.773E-20 | 2.450E-20 | 2.202E-20 | 2.001E-20 | 1.836E-20 |
| 4 | 13 | 2.515E-19 | 1.775E-19 | 1.392E-19 | 1.154E-19 | 7.121E-20 | 5.307E-20 | 4.298E-20 | 3.639E-20 | 2.682E-20 | 2.203E-20 | 1.855E-20 | 1.608E-20 | 1.424E-20 | 1.281E-20 | 1.165E-20 | 1.070E-20 |
| 4 | 14 | 4.576E-18 | 3.249E-18 | 2.556E-18 | 2.123E-18 | 1.317E-18 | 9.843E-19 | 7.986E-19 | 6.769E-19 | 4.997E-19 | 4.109E-19 | 3.463E-19 | 3.004E-19 | 2.660E-19 | 2.393E-19 | 2.177E-19 | 2.001E-19 |
| 4 | 15 | 1.146E-18 | 8.273E-19 | 6.565E-19 | 5.484E-19 | 3.438E-19 | 2.582E-19 | 2.101E-19 | 1.785E-19 | 1.322E-19 | 1.087E-19 | 9.184E-20 | 7.983E-20 | 7.079E-20 | 6.376E-20 | 5.808E-20 | 5.341E-20 |
| 4 | 16 | 6.219E-20 | 4.326E-20 | 3.319E-20 | 2.695E-20 | 1.562E-20 | 1.123E-20 | 8.882E-21 | 7.407E-21 | 5.345E-21 | 4.297E-21 | 3.587E-21 | 3.090E-21 | 2.720E-21 | 2.501E-21 | 2.265E-21 | 2.073E-21 |
| 4 | 17 | 5.920E-18 | 4.337E-18 | 3.471E-18 | 2.917E-18 | 1.850E-18 | 1.398E-18 | 1.141E-18 | 9.722E-19 | 7.231E-19 | 5.948E-19 | 5.035E-19 | 4.384E-19 | 3.893E-19 | 3.509E-19 | 3.199E-19 | 2.944E-19 |
| 4 | 18 | 6.230E-19 | 4.602E-19 | 3.700E-19 | 3.119E-19 | 1.989E-19 | 1.506E-19 | 1.232E-19 | 1.050E-19 | 7.826E-20 | 6.436E-20 | 5.455E-20 | 4.753E-20 | 4.223E-20 | 3.809E-20 | 3.475E-20 | 3.199E-20 |
| 4 | 19 | 6.568E-19 | 4.868E-19 | 3.921E-19 | 3.309E-19 | 2.116E-19 | 1.605E-19 | 1.313E-19 | 1.121E-19 | 8.361E-20 | 6.877E-20 | 5.833E-20 | 5.085E-20 | 4.520E-20 | 4.078E-20 | 3.721E-20 | 3.426E-20 |
| 4 | 21 | 1.783E-18 | 1.783E-18 | 1.089E-18 | 9.247E-19 | 5.971E-19 | 4.547E-19 | 3.729E-19 | 3.187E-19 | 2.383E-19 | 1.956E-19 | 1.662E-19 | 1.451E-19 | 1.291E-19 | 1.169E-19 | 1.067E-19 | 9.831E-20 |
| 4 | 23 | 1.418E-18 | 1.075E-18 | 8.770E-19 | 7.468E-19 | 4.863E-19 | 3.722E-19 | 3.063E-19 | 2.624E-19 | 1.969E-19 | 1.619E-19 | 1.379E-19 | 1.206E-19 | 1.074E-19 | 9.716E-20 | 8.880E-20 | 8.189E-20 |
| 4 | 24 | 2.296E-18 | 1.738E-18 | 1.416E-18 | 1.205E-18 | 7.834E-19 | 5.988E-19 | 4.923E-19 | 4.214E-19 | 3.160E-19 | 2.596E-19 | 2.210E-19 | 1.931E-19 | 1.720E-19 | 1.557E-19 | 1.423E-19 | 1.312E-19 |
| 4 | 25 | 7.538E-18 | 5.739E-18 | 4.696E-18 | 4.007E-18 | 2.621E-18 | 2.010E-18 | 1.656E-18 | 1.420E-18 | 1.067E-18 | 8.778E-19 | 8.778E-19 | 6.546E-19 | 5.836E-19 | 5.277E-19 | 4.824E-19 | 4.450E-19 |
| 4 | 26 | 1.275E-17 | 9.844E-18 | 8.117E-18 | 6.965E-18 | 4.608E-18 | 3.556E-18 | 2.940E-18 | 2.527E-18 | 1.906E-18 | 1.567E-18 | 1.339E-18 | 1.174E-18 | 1.048E-18 | 9.490E-19 | 8.685E-19 | 8.017E-19 |
| 4 | 27 | 9.981E-20 | 7.510E-20 | 6.064E-20 | 5.112E-20 | 3.215E-20 | 2.392E-20 | 1.919E-20 | 1.614E-20 | 1.174E-20 | 9.377E-21 | 7.811E-21 | 6.701E-21 | 5.875E-21 | 5.532E-21 | 4.992E-21 | 4.550E-21 |
| 5 | 7  | 2.810E-19 | 1.798E-19 | 1.345E-19 | 1.085E-19 | 6.376E-20 | 4.644E-20 | 3.710E-20 | 3.249E-20 | 1.844E-20 | 1.535E-20 | 1.320E-20 | 1.160E-20 | 1.038E-20 | 9.401E-21 | 8.602E-21 |           |
| 5 | 11 | 1.819E-18 | 1.221E-18 | 9.332E-19 | 9.332E-19 | 4.558E-19 | 3.349E-19 | 2.690E-19 | 2.263E-19 | 1.651E-19 | 1.355E-19 | 1.134E-19 | 9.791E-20 | 8.639E-20 | 7.745E-20 | 7.032E-20 | 6.447E-20 |
| 5 | 13 | 3.184E-18 | 2.211E-18 | 1.720E-18 | 1.418E-18 | 8.688E-19 | 6.453E-19 | 5.216E-19 | 4.409E-19 | 3.240E-19 | 2.663E-19 | 2.238E-19 | 1.937E-19 | 1.712E-19 | 1.538E-19 | 1.398E-19 | 1.283E-19 |
| 5 | 17 | 7.966E-18 | 5.741E-18 | 4.554E-18 | 3.803E-18 | 2.384E-18 | 1.790E-18 | 1.457E-18 | 1.238E-18 | 9.171E-19 | 7.544E-19 | 6.371E-19 | 5.536E-19 | 4.908E-19 | 4.418E-19 | 4.024E-19 | 3.699E-19 |
| 5 | 19 | 8.556E-20 | 6.199E-20 | 4.922E-20 | 4.110E-20 | 2.563E-20 | 1.918E-20 | 1.559E-20 | 1.323E-20 | 9.800E-21 | 8.065E-21 | 6.809E-21 | 5.916E-21 | 5.243E-21 | 4.717E-21 | 4.294E-21 | 3.946E-21 |
| 5 | 23 | 6.140E-20 | 4.278E-20 | 3.270E-20 | 2.642E-20 | 1.504E-20 | 1.074E-20 | 8.500E-21 | 7.111E-21 | 5.170E-21 | 4.189E-21 | 3.533E-21 | 3.071E-21 | 2.724E-21 | 2.454E-21 | 2.237E-21 | 2.058E-21 |
| 5 | 27 | 2.887E-17 | 2.206E-17 | 1.809E-17 | 1.547E-17 | 1.015E-17 |           |           |           |           |           |           |           |           |           |           |           |

**Table S13.** Cross sections (cm<sup>2</sup>) for Ge-like Sn<sup>18+</sup> for the transitions from initial to final levels with respective indices '*i*' and '*f*' and at scattered electron energies 50 – 5000 eV.

| Transition |          | 50        | 100       | 150       | 200       | 400       | 600       | 800       | 1000      | 1500      | 2000      | 2500      | 3000      | 3500      | 4000      | 4500      | 5000      |
|------------|----------|-----------|-----------|-----------|-----------|-----------|-----------|-----------|-----------|-----------|-----------|-----------|-----------|-----------|-----------|-----------|-----------|
| <i>i</i>   | <i>f</i> |           |           |           |           |           |           |           |           |           |           |           |           |           |           |           |           |
| 1          | 7        | 1.168E-17 | 8.264E-18 | 6.497E-18 | 5.398E-18 | 3.355E-18 | 2.512E-18 | 2.039E-18 | 1.729E-18 | 1.276E-18 | 1.049E-18 | 8.839E-19 | 7.667E-19 | 6.789E-19 | 6.105E-19 | 5.556E-19 | 5.105E-19 |
| 1          | 11       | 1.274E-18 | 9.318E-19 | 7.456E-19 | 6.268E-19 | 3.985E-19 | 3.016E-19 | 2.463E-19 | 2.100E-19 | 1.562E-19 | 1.284E-19 | 1.087E-19 | 9.462E-20 | 8.402E-20 | 7.572E-20 | 6.904E-20 | 6.354E-20 |
| 1          | 13       | 4.754E-18 | 3.552E-18 | 2.876E-18 | 2.437E-18 | 1.573E-18 | 1.200E-18 | 9.844E-19 | 8.419E-19 | 6.296E-19 | 5.178E-19 | 4.399E-19 | 3.839E-19 | 3.415E-19 | 3.083E-19 | 2.814E-19 | 2.593E-19 |
| 1          | 16       | 1.762E-18 | 1.351E-18 | 1.111E-18 | 9.515E-19 | 6.273E-19 | 4.835E-19 | 3.994E-19 | 3.431E-19 | 2.585E-19 | 2.126E-19 | 1.814E-19 | 1.589E-19 | 1.417E-19 | 1.282E-19 | 1.173E-19 | 1.082E-19 |
| 1          | 19       | 2.211E-17 | 1.717E-17 | 1.422E-17 | 1.225E-17 | 8.165E-18 | 6.330E-18 | 5.247E-18 | 4.519E-18 | 3.419E-18 | 2.811E-18 | 2.405E-18 | 2.109E-18 | 1.884E-18 | 1.707E-18 | 1.563E-18 | 1.443E-18 |
| 1          | 23       | 1.369E-19 | 1.079E-19 | 9.008E-20 | 7.806E-20 | 5.264E-20 | 4.106E-20 | 3.416E-20 | 2.951E-20 | 2.243E-20 | 1.838E-20 | 1.570E-20 | 1.377E-20 | 1.232E-20 | 1.117E-20 | 1.024E-20 | 9.556E-21 |
| 1          | 27       | 6.567E-20 | 5.228E-20 | 4.396E-20 | 3.827E-20 | 2.602E-20 | 2.035E-20 | 1.698E-20 | 1.470E-20 | 1.121E-20 | 9.198E-21 | 7.868E-21 | 6.910E-21 | 6.187E-21 | 5.612E-21 | 5.148E-21 | 4.706E-21 |
| 2          | 6        | 1.333E-18 | 8.824E-19 | 6.704E-19 | 5.453E-19 | 3.253E-19 | 2.388E-19 | 1.914E-19 | 1.610E-19 | 1.172E-19 | 9.602E-20 | 8.025E-20 | 6.921E-20 | 6.100E-20 | 5.466E-20 | 4.959E-20 | 4.544E-20 |
| 2          | 7        | 3.430E-20 | 1.973E-20 | 1.288E-20 | 9.035E-21 | 3.186E-21 | 1.546E-21 | 8.906E-22 | 5.690E-22 | 2.392E-22 | 1.222E-22 | 7.249E-23 | 4.884E-23 | 3.663E-23 | 2.964E-23 | 2.527E-23 | 2.227E-23 |
| 2          | 8        | 5.107E-18 | 3.534E-18 | 2.746E-18 | 2.264E-18 | 1.387E-18 | 1.031E-18 | 8.331E-19 | 7.044E-19 | 5.173E-19 | 4.248E-19 | 3.569E-19 | 3.089E-19 | 2.731E-19 | 2.452E-19 | 2.229E-19 | 2.046E-19 |
| 2          | 10       | 1.464E-18 | 1.041E-18 | 8.202E-19 | 6.825E-19 | 4.256E-19 | 3.192E-19 | 2.592E-19 | 2.200E-19 | 1.626E-19 | 1.336E-19 | 1.126E-19 | 9.776E-20 | 8.660E-20 | 7.790E-20 | 7.091E-20 | 6.517E-20 |
| 2          | 11       | 4.078E-18 | 2.911E-18 | 2.299E-18 | 1.915E-18 | 1.197E-18 | 8.986E-19 | 7.303E-19 | 6.202E-19 | 4.586E-19 | 3.769E-19 | 3.180E-19 | 2.761E-19 | 2.447E-19 | 2.201E-19 | 2.004E-19 | 1.842E-19 |
| 2          | 12       | 4.690E-20 | 3.104E-20 | 2.297E-20 | 1.812E-20 | 9.771E-21 | 6.778E-21 | 5.258E-21 | 4.336E-21 | 3.081E-21 | 2.473E-21 | 2.062E-21 | 1.777E-21 | 1.583E-21 | 1.419E-21 | 1.289E-21 | 1.182E-21 |
| 2          | 13       | 4.345E-18 | 3.177E-18 | 2.542E-18 | 2.136E-18 | 1.356E-18 | 1.026E-18 | 8.380E-19 | 7.142E-19 | 5.311E-19 | 4.367E-19 | 3.697E-19 | 3.218E-19 | 2.857E-19 | 2.575E-19 | 2.348E-19 | 2.161E-19 |
| 2          | 14       | 1.739E-19 | 1.244E-19 | 9.772E-20 | 8.095E-20 | 4.963E-20 | 3.692E-20 | 2.987E-20 | 2.530E-20 | 1.868E-20 | 1.529E-20 | 1.292E-20 | 1.124E-20 | 9.984E-21 | 8.995E-21 | 8.199E-21 | 7.544E-21 |
| 2          | 15       | 5.829E-19 | 4.310E-19 | 3.463E-19 | 2.918E-19 | 1.856E-19 | 1.402E-19 | 1.142E-19 | 9.705E-20 | 7.198E-20 | 5.863E-20 | 4.951E-20 | 4.299E-20 | 3.868E-20 | 3.479E-20 | 3.166E-20 | 2.909E-20 |
| 2          | 16       | 2.052E-18 | 1.543E-18 | 1.254E-18 | 1.065E-18 | 6.904E-19 | 5.277E-19 | 4.336E-19 | 3.712E-19 | 2.781E-19 | 2.287E-19 | 1.945E-19 | 1.698E-19 | 1.512E-19 | 1.365E-19 | 1.247E-19 | 1.149E-19 |
| 2          | 18       | 8.799E-18 | 6.696E-18 | 5.480E-18 | 4.680E-18 | 3.070E-18 | 2.361E-18 | 1.947E-18 | 1.671E-18 | 1.257E-18 | 1.033E-18 | 8.808E-19 | 7.707E-19 | 6.872E-19 | 6.214E-19 | 5.681E-19 | 5.241E-19 |
| 2          | 19       | 1.727E-18 | 1.315E-18 | 1.077E-18 | 9.194E-19 | 6.027E-19 | 4.634E-19 | 3.821E-19 | 3.279E-19 | 2.467E-19 | 2.028E-19 | 1.729E-19 | 1.513E-19 | 1.350E-19 | 1.221E-19 | 1.116E-19 | 1.030E-19 |
| 2          | 21       | 6.391E-18 | 4.945E-18 | 4.086E-18 | 3.514E-18 | 2.335E-18 | 1.807E-18 | 1.496E-18 | 1.288E-18 | 9.733E-19 | 8.004E-19 | 6.841E-19 | 5.999E-19 | 5.357E-19 | 4.850E-19 | 4.439E-19 | 4.099E-19 |
| 2          | 22       | 2.113E-18 | 1.637E-18 | 1.354E-18 | 1.165E-18 | 7.751E-19 | 6.003E-19 | 4.973E-19 | 4.281E-19 | 3.236E-19 | 2.661E-19 | 2.275E-19 | 1.995E-19 | 1.782E-19 | 1.614E-19 | 1.477E-19 | 1.364E-19 |
| 2          | 23       | 4.470E-18 | 3.472E-18 | 2.875E-18 | 2.477E-18 | 1.651E-18 | 1.280E-18 | 1.061E-18 | 9.134E-19 | 6.910E-19 | 5.682E-19 | 4.860E-19 | 4.264E-19 | 3.809E-19 | 3.450E-19 | 3.158E-19 | 2.917E-19 |
| 2          | 25       | 1.801E-18 | 1.401E-18 | 1.161E-18 | 1.001E-18 | 6.676E-19 | 5.178E-19 | 4.293E-19 | 3.698E-19 | 2.799E-19 | 2.301E-19 | 1.969E-19 | 1.727E-19 | 1.544E-19 | 1.399E-19 | 1.281E-19 | 1.183E-19 |
| 2          | 27       | 1.306E-19 | 1.021E-19 | 8.484E-20 | 7.320E-20 | 4.888E-20 | 3.795E-20 | 3.151E-20 | 2.719E-20 | 2.063E-20 | 1.690E-20 | 1.443E-20 | 1.266E-20 | 1.132E-20 | 1.026E-20 | 9.406E-21 | 8.807E-21 |
| 3          | 6        | 6.696E-19 | 4.380E-19 | 3.306E-19 | 2.678E-19 | 1.584E-19 | 1.158E-19 | 9.258E-20 | 7.771E-20 | 5.642E-20 | 4.619E-20 | 3.856E-20 | 3.322E-20 | 2.927E-20 | 2.621E-20 | 2.377E-20 | 2.177E-20 |
| 3          | 7        | 4.862E-19 | 3.309E-19 | 2.547E-19 | 2.088E-19 | 1.264E-19 | 9.344E-20 | 7.523E-20 | 6.345E-20 | 4.642E-20 | 3.806E-20 | 3.191E-20 | 2.759E-20 | 2.438E-20 | 2.187E-20 | 1.987E-20 | 1.823E-20 |
| 3          | 8        | 1.332E-19 | 8.878E-20 | 6.706E-20 | 5.409E-20 | 3.139E-20 | 2.272E-20 | 1.808E-20 | 1.514E-20 | 1.097E-20 | 8.948E-21 | 7.486E-21 | 6.463E-21 | 5.714E-21 | 5.125E-21 | 4.655E-21 | 4.270E-21 |
| 3          | 9        | 2.334E-18 | 1.613E-18 | 1.252E-18 | 1.031E-18 | 6.287E-19 | 4.666E-19 | 3.766E-19 | 3.183E-19 | 2.336E-19 | 1.918E-19 | 1.611E-19 | 1.395E-19 | 1.233E-19 | 1.107E-19 | 1.006E-19 | 9.238E-20 |
| 3          | 11       | 1.986E-19 | 1.396E-19 | 1.091E-19 | 9.022E-20 | 5.542E-20 | 4.126E-20 | 3.338E-20 | 2.826E-20 | 2.081E-20 | 1.708E-20 | 1.438E-20 | 1.247E-20 | 1.105E-20 | 9.933E-21 | 9.040E-21 | 8.305E-21 |
| 3          | 12       | 5.488E-18 | 3.900E-18 | 3.072E-18 | 2.556E-18 | 1.592E-18 | 1.193E-18 | 9.687E-19 | 8.221E-19 | 6.072E-19 | 4.991E-19 | 4.208E-19 | 3.651E-19 | 3.234E-19 | 2.909E-19 | 2.648E-19 | 2.433E-19 |
| 3          | 13       | 7.854E-18 | 5.711E-18 | 4.556E-18 | 3.822E-18 | 2.420E-18 | 1.828E-18 | 1.491E-18 | 1.270E-18 | 9.430E-19 | 7.753E-19 | 6.558E-19 | 5.705E-19 | 5.063E-19 | 4.561E-19 | 4.157E-19 | 3.825E-19 |
| 3          | 14       | 2.876E-19 | 2.067E-19 | 1.633E-19 | 1.359E-19 | 8.429E-20 | 6.298E-20 | 5.103E-20 | 4.326E-20 | 3.192E-20 | 2.613E-20 | 2.203E-20 | 1.911E-20 | 1.704E-20 | 1.532E-20 | 1.394E-20 | 1.281E-20 |
| 3          | 15       | 1.387E-18 | 1.024E-18 | 8.237E-19 | 6.944E-19 | 4.437E-19 | 3.368E-19 | 2.755E-19 | 2.351E-19 | 1.754E-19 | 1.440E-19 | 1.221E-19 | 1.065E-19 | 9.472E-20 | 8.545E-20 | 7.796E-20 | 7.179E-20 |
| 3          | 16       | 1.281E-20 | 8.607E-21 | 6.351E-21 | 4.969E-21 | 2.555E-21 | 1.695E-21 | 1.268E-21 | 1.016E-21 | 6.891E-22 | 5.275E-22 | 4.279E-22 | 3.606E-22 | 3.361E-22 | 2.966E-22 | 2.656E-22 | 2.408E-22 |
| 3          | 17       | 2.059E-18 | 1.538E-18 | 1.245E-18 | 1.055E-18 | 6.811E-19 | 5.197E-19 | 4.264E-19 | 3.646E-19 | 2.729E-19 | 2.241E-19 | 1.904E-19 | 1.662E-19 | 1.482E-19 | 1.338E-19 | 1.222E-19 | 1.126E-19 |
| 3          | 18       | 3.911E-18 | 2.955E-18 | 2.407E-18 | 2.049E-18 | 1.334E-18 | 1.022E-18 | 8.411E-19 | 7.206E-19 | 5.407E-19 | 4.445E-19 | 3.783E-19 | 3.306E-19 | 2.946E-19 | 2.662E-19 | 2.432E-19 | 2.243E-19 |
| 3          | 19       | 1.542E-19 | 1.147E-19 | 9.224E-20 | 7.767E-20 | 4.917E-20 | 3.704E-20 | 3.011E-20 | 2.558E-20 | 1.896E-20 | 1.540E-20 | 1.301E-20 | 1.131E-20 | 1.020E-20 | 9.179E-21 | 8.355E-21 | 7.679E-21 |
| 3          | 21       | 3.694E-18 | 2.841E-18 | 2.339E-18 | 2.005E-18 | 1.324E-18 | 1.022E-18 | 8.444E-19 | 7.258E-19 | 5.473E-19 | 4.501E-19 | 3.842E-19 | 3.366E-19 | 3.004E-19 | 2.718E-19 | 2.486E-19 | 2.294E-19 |
| 3          | 23       | 9.089E-19 | 7.014E-19 | 5.786E-19 | 4.968E-19 | 3.290E-19 | 2.543E-19 | 2.103E-19 | 1.809E-19 | 1.365E-19 | 1.122E-19 | 9.587E-20 | 8.403E-20 | 7.505E-20 | 6.794E-20 | 6.216E-20 | 5.738E-20 |
| 3          | 24       | 1.186E-17 | 9.172E-18 | 7.578E-18 | 6.515E-18 | 4.329E-18 | 3.351E-18 | 2.775E-18 | 2.388E-18 | 1.805E-18 | 1.484E-18 | 1.268E-18 | 1.112E-18 | 9.932E-19 | 8.993E-19 | 8.231E-19 | 7.599E-19 |
| 3          | 25       | 1.353E-18 | 1.047E-18 | 8.653E-19 | 7.440E-19 | 4.941E-19 | 3.823E-19 | 3.165E-19 | 2.723E-19 | 2.057E-19 | 1.690E-19 | 1.444E-19 | 1.266E-19 | 1.132E-19 | 1.025E-19 | 9.378E-20 | 8.657E-20 |
| 3          | 26       | 1.925E-18 | 1.508E-18 | 1.255E-18 | 1.085E-18 | 7.280E-19 | 5.663E-19 | 4.703E-19 | 4.056E-19 | 3.075E-19 | 2.517E-19 | 2.147E-19 | 1.882E-19 | 1.682E-19 | 1.524E-19 | 1.396E-19 | 1.306E-19 |
| 3          | 27       | 3.887E-20 | 2.916E-20 | 2.345E-20 | 1.968E-20 | 1.220E-20 | 8.993E-21 | 7.165E-21 | 5.991E-21 | 4.324E-21 | 3.414E-21 | 2.824E-21 | 2.412E-21 | 2.108E-21 | 1.874E-21 | 1.687E-21 | 1.574E-21 |
| 4          | 6        | 1.044E-19 | 6.497E-20 | 4.794E-20 | 3.834E-20 | 2.212E-20 | 1.598E-20 | 1.269E-20 | 1.059E-20 | 7.623E-21 | 6.222E-21 | 5.167E-21 | 4.435E-21 | 3.896E-21 | 3.480E-21 | 3.150E-21 | 2.881E-21 |
| 4          | 7        | 2.766E-19 | 1.808E-19 | 1.365E-19 | 1.106E-19 | 6.557E-20 | 4.799E-20 | 3.840E-20 | 3.224E-20 | 2.341E-20 | 1.917E-20 | 1.600E-20 | 1.379E-20 | 1.215E-20 | 1.088E-20 | 9.862E-21 | 9.034E-21 |
| 4          | 8        | 2.007E-19 | 1.298E-19 | 9.695E-20 | 7.781E-20 | 4.493E-20 | 3.246E-20 | 2.580E-20 | 2.157E-20 | 1.558E-20 | 1.273E-20 | 1.061E-20 | 9.137E-21 | 8.047E-21 | 7.204E-21 | 6.532E-21 | 5.984E-21 |
| 4          | 9        | 3.076E-18 | 2.055E-18 | 1.570E-18 | 1.281E-18 | 7.64E-19  | 5.667E-19 | 4.553E-19 | 3.833E-19 | 2.796E-19 | 2.293E-19 | 1.918E-19 | 1.655E-19 | 1.460E-19 | 1.308E-19 | 1.187E-19 | 1.088E-19 |
| 4          | 11       | 1.814E-20 | 1.085E-20 | 7.408E-21 | 5.457E-21 | 2.385E-21 | 1.440E-21 | 1.017E-21 | 7.846E-22 | 5.038E-22 | 3.816E-22 | 3.079E-22 | 2.607E-22 | 2.288E-22 | 2.041E-22 | 1.848E-22 | 1.692E-22 |

|   |    |           |           |           |           |           |           |           |           |           |           |           |           |           |           |           |           |
|---|----|-----------|-----------|-----------|-----------|-----------|-----------|-----------|-----------|-----------|-----------|-----------|-----------|-----------|-----------|-----------|-----------|
| 4 | 12 | 4.125E-19 | 2.796E-19 | 2.141E-19 | 1.747E-19 | 1.043E-19 | 7.658E-20 | 6.142E-20 | 5.169E-20 | 3.771E-20 | 3.085E-20 | 2.585E-20 | 2.234E-20 | 1.977E-20 | 1.774E-20 | 1.611E-20 | 1.478E-20 |
| 4 | 13 | 2.143E-19 | 1.505E-19 | 1.178E-19 | 9.747E-20 | 6.006E-20 | 4.477E-20 | 3.623E-20 | 3.067E-20 | 2.258E-20 | 1.853E-20 | 1.560E-20 | 1.352E-20 | 1.197E-20 | 1.076E-20 | 9.787E-21 | 8.989E-21 |
| 4 | 14 | 5.557E-18 | 3.920E-18 | 3.075E-18 | 2.551E-18 | 1.581E-18 | 1.182E-18 | 9.581E-19 | 8.122E-19 | 5.988E-19 | 4.920E-19 | 4.144E-19 | 3.593E-19 | 3.181E-19 | 2.860E-19 | 2.602E-19 | 2.390E-19 |
| 4 | 15 | 9.989E-19 | 7.183E-19 | 5.691E-19 | 4.752E-19 | 2.980E-19 | 2.240E-19 | 1.822E-19 | 1.549E-19 | 1.147E-19 | 9.422E-20 | 7.957E-20 | 6.914E-20 | 6.133E-20 | 5.521E-20 | 5.029E-20 | 4.624E-20 |
| 4 | 16 | 6.803E-18 | 4.955E-18 | 3.956E-18 | 3.320E-18 | 2.103E-18 | 1.589E-18 | 1.297E-18 | 1.105E-18 | 8.207E-19 | 6.747E-19 | 5.708E-19 | 4.967E-19 | 4.409E-19 | 3.972E-19 | 3.621E-19 | 3.332E-19 |
| 4 | 17 | 6.089E-20 | 4.158E-20 | 3.147E-20 | 2.528E-20 | 1.428E-20 | 1.013E-20 | 7.944E-21 | 6.591E-21 | 4.718E-21 | 3.766E-21 | 3.129E-21 | 2.685E-21 | 2.442E-21 | 2.179E-21 | 1.970E-21 | 1.800E-21 |
| 4 | 18 | 7.200E-19 | 5.303E-19 | 4.259E-19 | 3.589E-19 | 2.291E-19 | 1.737E-19 | 1.420E-19 | 1.212E-19 | 9.025E-20 | 7.419E-20 | 6.286E-20 | 5.475E-20 | 4.867E-20 | 4.388E-20 | 4.002E-20 | 3.684E-20 |
| 4 | 19 | 5.166E-19 | 3.818E-19 | 3.073E-19 | 2.592E-19 | 1.659E-19 | 1.260E-19 | 1.031E-19 | 8.804E-20 | 6.565E-20 | 5.398E-20 | 4.578E-20 | 3.990E-20 | 3.546E-20 | 3.199E-20 | 2.918E-20 | 2.687E-20 |
| 4 | 21 | 2.292E-18 | 1.719E-18 | 1.394E-18 | 1.182E-18 | 7.635E-19 | 5.823E-19 | 4.776E-19 | 4.084E-19 | 3.054E-19 | 2.507E-19 | 2.130E-19 | 1.858E-19 | 1.657E-19 | 1.496E-19 | 1.365E-19 | 1.258E-19 |
| 4 | 23 | 1.434E-18 | 1.082E-18 | 8.811E-19 | 7.496E-19 | 4.879E-19 | 3.738E-19 | 3.075E-19 | 2.635E-19 | 1.977E-19 | 1.625E-19 | 1.383E-19 | 1.209E-19 | 1.077E-19 | 9.735E-20 | 8.896E-20 | 8.202E-20 |
| 4 | 24 | 2.610E-18 | 1.968E-18 | 1.601E-18 | 1.361E-18 | 8.848E-19 | 6.771E-19 | 5.567E-19 | 4.767E-19 | 3.575E-19 | 2.936E-19 | 2.498E-19 | 2.183E-19 | 1.947E-19 | 1.759E-19 | 1.607E-19 | 1.481E-19 |
| 4 | 25 | 7.876E-18 | 5.971E-18 | 4.876E-18 | 4.157E-18 | 2.717E-18 | 2.086E-18 | 1.718E-18 | 1.474E-18 | 1.107E-18 | 9.103E-19 | 7.754E-19 | 6.781E-19 | 6.043E-19 | 5.463E-19 | 4.993E-19 | 4.605E-19 |
| 4 | 26 | 1.383E-17 | 1.063E-17 | 8.754E-18 | 7.507E-18 | 4.966E-18 | 3.836E-18 | 3.171E-18 | 2.726E-18 | 2.057E-18 | 1.691E-18 | 1.444E-18 | 1.265E-18 | 1.130E-18 | 1.022E-18 | 9.353E-19 | 8.632E-19 |
| 4 | 27 | 1.109E-19 | 8.289E-20 | 6.670E-20 | 5.611E-20 | 3.515E-20 | 2.610E-20 | 2.092E-20 | 1.757E-20 | 1.277E-20 | 1.016E-20 | 8.446E-21 | 7.234E-21 | 6.703E-21 | 5.965E-21 | 5.378E-21 | 4.902E-21 |
| 5 | 7  | 3.028E-19 | 1.932E-19 | 1.445E-19 | 1.165E-19 | 6.847E-20 | 4.991E-20 | 3.984E-20 | 3.338E-20 | 2.415E-20 | 1.977E-20 | 1.645E-20 | 1.414E-20 | 1.244E-20 | 1.112E-20 | 1.007E-20 | 9.213E-21 |
| 5 | 11 | 1.800E-18 | 1.200E-18 | 9.138E-19 | 7.441E-19 | 4.446E-19 | 3.267E-19 | 2.621E-19 | 2.205E-19 | 1.606E-19 | 1.316E-19 | 1.101E-19 | 9.501E-20 | 8.380E-20 | 7.512E-20 | 6.818E-20 | 6.251E-20 |
| 5 | 13 | 3.435E-18 | 2.375E-18 | 1.844E-18 | 1.521E-18 | 9.311E-19 | 6.921E-19 | 5.591E-19 | 4.727E-19 | 3.470E-19 | 2.851E-19 | 2.394E-19 | 2.072E-19 | 1.831E-19 | 1.644E-19 | 1.494E-19 | 1.372E-19 |
| 5 | 16 | 9.001E-18 | 6.444E-18 | 5.097E-18 | 4.251E-18 | 2.661E-18 | 1.999E-18 | 1.625E-18 | 1.381E-18 | 1.021E-18 | 8.396E-19 | 7.085E-19 | 6.152E-19 | 5.452E-19 | 4.906E-19 | 4.467E-19 | 4.106E-19 |
| 5 | 19 | 2.426E-20 | 1.719E-20 | 1.343E-20 | 1.108E-20 | 6.695E-21 | 4.940E-21 | 3.980E-21 | 3.367E-21 | 2.474E-21 | 2.031E-21 | 1.710E-21 | 1.482E-21 | 1.310E-21 | 1.176E-21 | 1.069E-21 | 9.811E-22 |
| 5 | 23 | 5.366E-20 | 3.626E-20 | 2.706E-20 | 2.145E-20 | 1.163E-20 | 8.101E-21 | 6.323E-21 | 5.250E-21 | 3.773E-21 | 3.041E-21 | 2.558E-21 | 2.219E-21 | 1.966E-21 | 1.770E-21 | 1.612E-21 | 1.483E-21 |
| 5 | 27 | 3.150E-17 | 2.398E-17 | 1.963E-17 | 1.677E-17 | 1.100E-17 | 8.460E-18 | 6.977E-18 | 5.987E-18 | 4.504E-18 | 3.704E-18 | 3.157E-18 | 2.762E-18 | 2.462E-18 | 2.227E-18 | 2.036E-18 | 1.878E-18 |

**Table S14.** Cross sections (cm<sup>2</sup>) for Ge-like In<sup>17+</sup> for the transitions from initial to final levels with respective indices '*i*' and '*f*' and at scattered electron energies 50 – 5000 eV.

| Transition |          | 50        | 100       | 150       | 200       | 400       | 600       | 800       | 1000      | 1500      | 2000      | 2500      | 3000      | 3500      | 4000      | 4500      | 5000      |
|------------|----------|-----------|-----------|-----------|-----------|-----------|-----------|-----------|-----------|-----------|-----------|-----------|-----------|-----------|-----------|-----------|-----------|
| <i>i</i>   | <i>f</i> |           |           |           |           |           |           |           |           |           |           |           |           |           |           |           |           |
| 1          | 7        | 1.246E-17 | 8.754E-18 | 6.856E-18 | 5.668E-18 | 3.526E-18 | 2.639E-18 | 2.138E-18 | 1.812E-18 | 1.131E-18 | 1.097E-18 | 9.237E-19 | 9.237E-19 | 7.086E-19 | 6.369E-19 | 5.579E-19 | 5.322E-19 |
| 1          | 11       | 1.473E-18 | 1.068E-18 | 8.508E-19 | 7.133E-19 | 4.520E-19 | 3.418E-19 | 2.788E-19 | 2.373E-19 | 1.770E-19 | 1.448E-19 | 1.224E-19 | 1.065E-19 | 9.452E-20 | 8.514E-20 | 7.760E-20 | 7.138E-20 |
| 1          | 14       | 5.398E-18 | 4.004E-18 | 3.231E-18 | 2.732E-18 | 2.865E-18 | 1.340E-18 | 1.099E-18 | 9.394E-19 | 7.026E-19 | 5.770E-19 | 5.770E-19 | 4.269E-19 | 3.796E-19 | 3.424E-19 | 3.125E-19 | 2.878E-19 |
| 1          | 16       | 1.639E-18 | 1.246E-18 | 1.021E-18 | 8.720E-19 | 8.720E-19 | 4.411E-19 | 3.639E-19 | 3.639E-19 | 2.358E-19 | 2.358E-19 | 2.358E-19 | 2.358E-19 | 1.284E-19 | 1.160E-19 | 1.061E-19 | 1.061E-19 |
| 1          | 19       | 2.483E-17 | 1.918E-17 | 1.585E-17 | 1.363E-17 | 9.078E-18 | 7.038E-18 | 5.832E-18 | 5.021E-18 | 3.797E-18 | 3.123E-18 | 2.669E-18 | 2.339E-18 | 2.089E-18 | 1.891E-18 | 1.730E-18 | 1.597E-18 |
| 1          | 23       | 1.991E-19 | 1.558E-19 | 1.298E-19 | 1.123E-19 | 7.557E-20 | 5.892E-20 | 4.901E-20 | 4.231E-20 | 3.213E-20 | 2.632E-20 | 2.247E-20 | 1.970E-20 | 1.760E-20 | 1.596E-20 | 1.462E-20 | 1.365E-20 |
| 1          | 27       | 7.698E-20 | 6.089E-20 | 5.104E-20 | 4.434E-20 | 3.004E-20 | 2.349E-20 | 1.959E-20 | 1.695E-20 | 1.291E-20 | 1.059E-20 | 9.059E-21 | 7.950E-21 | 7.111E-21 | 6.451E-21 | 5.917E-21 | 5.525E-21 |
| 2          | 6        | 1.233E-18 | 8.105E-19 | 6.133E-19 | 4.979E-19 | 2.960E-19 | 2.172E-19 | 1.738E-19 | 1.461E-19 | 1.043E-19 | 8.688E-20 | 7.257E-20 | 6.255E-20 | 5.512E-20 | 4.937E-20 | 4.478E-20 | 4.478E-20 |
| 2          | 8        | 5.793E-18 | 3.982E-18 | 3.084E-18 | 2.539E-18 | 1.553E-18 | 1.154E-18 | 9.321E-19 | 7.877E-19 | 5.618E-19 | 4.741E-19 | 3.980E-19 | 3.442E-19 | 3.042E-19 | 2.730E-19 | 2.481E-19 | 2.277E-19 |
| 2          | 10       | 1.607E-18 | 1.134E-18 | 8.910E-19 | 7.401E-19 | 4.607E-19 | 3.454E-19 | 2.802E-19 | 2.377E-19 | 1.734E-19 | 1.440E-19 | 1.213E-19 | 1.052E-19 | 9.321E-20 | 8.381E-20 | 7.627E-20 | 7.008E-20 |
| 2          | 11       | 4.325E-18 | 3.064E-18 | 2.411E-18 | 2.005E-18 | 1.251E-18 | 9.389E-19 | 7.622E-19 | 6.468E-19 | 4.724E-19 | 3.924E-19 | 3.307E-19 | 2.869E-19 | 2.541E-19 | 2.285E-19 | 2.080E-19 | 1.911E-19 |
| 2          | 12       | 3.479E-20 | 2.190E-20 | 1.553E-2  | 1.180E-20 | 5.718E-21 | 3.719E-21 | 2.770E-21 | 2.223E-21 | 1.319E-21 | 1.191E-21 | 9.801E-22 | 8.381E-22 | 7.498E-22 | 6.697E-22 | 6.063E-22 | 5.548E-22 |
| 2          | 13       | 2.027E-19 | 1.436E-19 | 1.123E-19 | 9.275E-20 | 5.668E-20 | 4.215E-20 | 3.408E-20 | 2.886E-20 | 2.140E-20 | 1.743E-20 | 1.472E-20 | 1.279E-20 | 1.136E-20 | 1.023E-20 | 9.325E-21 | 8.578E-21 |
| 2          | 14       | 4.850E-18 | 3.526E-18 | 2.813E-18 | 2.361E-18 | 1.498E-18 | 1.133E-18 | 9.253E-19 | 7.881E-19 | 5.855E-19 | 4.814E-19 | 4.072E-19 | 3.542E-19 | 3.144E-19 | 2.832E-19 | 2.582E-19 | 2.376E-19 |
| 2          | 15       | 5.827E-19 | 4.280E-19 | 3.427E-19 | 2.881E-19 | 1.827E-19 | 1.378E-19 | 1.120E-19 | 9.514E-20 | 7.087E-20 | 5.728E-20 | 4.828E-20 | 4.188E-20 | 3.770E-20 | 3.388E-20 | 3.081E-20 | 2.829E-20 |
| 2          | 16       | 2.448E-18 | 1.827E-18 | 1.480E-18 | 1.254E-18 | 8.119E-19 | 6.203E-19 | 5.093E-19 | 4.357E-19 | 3.269E-19 | 2.681E-19 | 2.277E-19 | 1.987E-19 | 1.768E-19 | 1.595E-19 | 1.457E-19 | 1.342E-19 |
| 2          | 18       | 9.422E-18 | 7.138E-18 | 5.832E-18 | 4.975E-18 | 3.264E-18 | 2.511E-18 | 2.071E-18 | 1.776E-18 | 1.342E-18 | 1.099E-18 | 9.360E-19 | 8.186E-19 | 7.296E-19 | 6.596E-19 | 6.029E-19 | 5.560E-19 |
| 2          | 19       | 1.675E-18 | 1.269E-18 | 1.037E-18 | 8.851E-19 | 5.801E-19 | 4.462E-1  | 3.680E-19 | 3.157E-19 | 2.383E-19 | 1.953E-19 | 1.664E-19 | 1.455E-19 | 1.297E-19 | 1.173E-19 | 1.072E-19 | 9.892E-20 |
| 2          | 21       | 7.030E-18 | 5.409E-18 | 4.461E-18 | 3.829E-18 | 2.542E-18 | 1.968E-18 | 1.629E-18 | 1.401E-18 | 1.059E-18 | 8.708E-19 | 7.437E-19 | 6.51E-19  | 5.816E-19 | 5.264E-19 | 4.816E-19 | 4.445E-19 |
| 2          | 22       | 2.339E-18 | 1.803E-18 | 1.488E-18 | 1.278E-18 | 8.496E-19 | 6.580E-19 | 5.449E-19 | 4.689E-19 | 3.546E-19 | 2.915E-19 | 2.489E-19 | 2.182E-19 | 1.947E-19 | 1.763E-19 | 1.613E-19 | 1.489E-19 |
| 2          | 23       | 5.056E-18 | 3.905E-18 | 3.227E-18 | 2.775E-18 | 1.847E-18 | 1.432E-18 | 1.187E-18 | 1.021E-18 | 7.727E-19 | 6.356E-19 | 5.431E-19 | 4.761E-19 | 4.251E-19 | 3.848E-19 | 3.522E-19 | 3.251E-19 |
| 2          | 25       | 2.267E-18 | 1.754E-18 | 1.451E-18 | 1.248E-18 | 8.318E-19 | 6.452E-19 | 5.348E-19 | 4.605E-19 | 3.481E-19 | 2.865E-19 | 2.449E-19 | 2.147E-19 | 1.918E-19 | 1.737E-19 | 1.590E-19 | 1.468E-19 |
| 2          | 27       | 1.389E-19 | 1.079E-19 | 8.947E-20 | 7.705E-20 | 5.135E-20 | 3.989E-20 | 3.312E-20 | 2.856E-20 | 2.167E-20 | 1.775E-20 | 1.515E-20 | 1.328E-20 | 1.187E-20 | 1.076E-20 | 9.867E-21 | 9.212E-21 |

|   |    |           |           |           |           |           |           |           |           |           |           |           |           |           |           |           |           |
|---|----|-----------|-----------|-----------|-----------|-----------|-----------|-----------|-----------|-----------|-----------|-----------|-----------|-----------|-----------|-----------|-----------|
| 3 | 6  | 6.405E-19 | 4.157E-19 | 3.125E-19 | 2.526E-19 | 1.489E-19 | 1.087E-19 | 8.685E-20 | 7.286E-20 | 5.238E-20 | 4.317E-20 | 3.601E-20 | 3.101E-20 | 2.731E-20 | 2.445E-20 | 2.217E-20 | 2.030E-20 |
| 3 | 7  | 4.372E-19 | 2.956E-19 | 2.268E-19 | 1.856E-19 | 1.121E-19 | 8.288E-20 | 6.664E-20 | 5.618E-20 | 4.123E-20 | 3.362E-20 | 2.817E-20 | 2.434E-20 | 2.150E-20 | 1.929E-20 | 1.752E-20 | 2.030E-20 |
| 3 | 8  | 1.362E-19 | 8.969E-20 | 6.724E-20 | 5.399E-20 | 3.106E-20 | 2.242E-20 | 1.779E-20 | 1.488E-20 | 1.084E-20 | 8.767E-21 | 7.328E-21 | 6.323E-21 | 5.590E-21 | 5.012E-21 | 4.550E-21 | 4.173E-21 |
| 3 | 9  | 2.680E-18 | 1.839E-18 | 1.422E-18 | 1.168E-18 | 7.118E-19 | 5.281E-19 | 4.258E-19 | 3.597E-19 | 2.547E-19 | 2.162E-19 | 1.815E-19 | 1.570E-19 | 1.387E-19 | 1.245E-19 | 1.132E-19 | 1.039E-19 |
| 3 | 11 | 2.326E-19 | 1.623E-19 | 1.264E-19 | 1.043E-19 | 6.400E-20 | 4.765E-20 | 3.851E-20 | 3.259E-20 | 2.340E-20 | 1.966E-20 | 1.655E-20 | 1.434E-20 | 1.269E-20 | 1.141E-20 | 1.038E-20 | 9.356E-20 |
| 3 | 12 | 5.921E-18 | 4.177E-18 | 3.279E-18 | 2.723E-18 | 1.693E-18 | 1.268E-18 | 1.029E-18 | 8.726E-19 | 6.338E-19 | 5.287E-19 | 4.453E-19 | 3.862E-19 | 3.419E-19 | 3.074E-19 | 2.797E-19 | 2.570E-19 |
| 3 | 13 | 4.729E-19 | 3.382E-19 | 2.668E-19 | 2.220E-19 | 1.381E-19 | 1.035E-19 | 8.398E-20 | 7.124E-20 | 5.168E-20 | 4.311E-20 | 3.635E-20 | 3.155E-20 | 2.805E-20 | 2.523E-20 | 2.296E-20 | 2.110E-20 |
| 3 | 14 | 8.721E-18 | 6.306E-18 | 5.017E-18 | 4.203E-18 | 2.658E-18 | 2.008E-18 | 1.637E-18 | 1.393E-18 | 1.035E-18 | 8.501E-19 | 7.185E-19 | 6.247E-19 | 5.541E-19 | 4.991E-19 | 4.547E-19 | 4.183E-19 |
| 3 | 15 | 1.331E-18 | 9.776E-19 | 7.839E-19 | 6.598E-19 | 4.210E-19 | 3.196E-19 | 2.613E-19 | 2.228E-19 | 1.670E-19 | 1.363E-19 | 1.155E-19 | 1.006E-19 | 8.956E-20 | 8.076E-20 | 7.367E-20 | 6.782E-20 |
| 3 | 16 | 2.104E-20 | 1.442E-20 | 1.088E-20 | 8.709E-21 | 4.838E-21 | 3.400E-21 | 2.654E-21 | 2.196E-21 | 1.441E-21 | 1.248E-21 | 1.039E-21 | 8.934E-22 | 8.063E-22 | 7.208E-20 | 6.528E-22 | 5.972E-22 |
| 3 | 17 | 2.013E-18 | 1.495E-18 | 1.207E-18 | 1.020E-18 | 6.585E-19 | 5.024E-19 | 4.120E-19 | 3.521E-19 | 2.653E-19 | 2.162E-19 | 1.836E-19 | 1.601E-19 | 1.427E-19 | 1.288E-19 | 1.176E-19 | 1.083E-19 |
| 3 | 18 | 4.361E-18 | 3.279E-18 | 2.667E-18 | 2.268E-18 | 1.477E-18 | 1.132E-18 | 9.313E-19 | 7.977E-19 | 6.014E-19 | 4.919E-19 | 4.184E-19 | 3.655E-19 | 3.256E-19 | 2.941E-19 | 2.686E-19 | 2.476E-19 |
| 3 | 19 | 1.803E-19 | 1.335E-19 | 1.071E-19 | 9.018E-20 | 5.716E-20 | 4.312E-20 | 3.508E-20 | 2.981E-20 | 2.220E-20 | 1.798E-20 | 1.518E-20 | 1.319E-20 | 1.189E-20 | 1.069E-20 | 9.740E-21 | 8.952E-21 |
| 3 | 21 | 3.791E-18 | 2.898E-18 | 2.380E-18 | 2.037E-18 | 1.343E-18 | 1.036E-18 | 8.565E-19 | 7.359E-19 | 5.557E-19 | 4.561E-19 | 3.890E-19 | 3.405E-19 | 3.037E-19 | 2.747E-19 | 2.512E-19 | 2.317E-19 |
| 3 | 23 | 1.040E-18 | 7.984E-19 | 6.571E-19 | 5.633E-19 | 3.726E-19 | 2.879E-19 | 2.381E-19 | 2.047E-19 | 1.546E-19 | 1.270E-19 | 1.083E-19 | 9.492E-20 | 8.474E-20 | 7.667E-20 | 7.013E-20 | 6.472E-20 |
| 3 | 24 | 1.322E-17 | 1.017E-17 | 8.387E-18 | 7.199E-18 | 4.779E-18 | 3.700E-18 | 3.063E-18 | 2.635E-18 | 1.992E-18 | 1.637E-18 | 1.398E-18 | 1.225E-18 | 1.093E-18 | 9.898E-19 | 9.056E-19 | 8.359E-19 |
| 3 | 25 | 1.751E-18 | 1.347E-18 | 1.111E-18 | 9.542E-19 | 6.331E-19 | 4.900E-19 | 4.055E-19 | 3.487E-19 | 2.634E-19 | 2.164E-19 | 1.848E-19 | 1.619E-19 | 1.446E-19 | 1.309E-19 | 1.197E-19 | 1.105E-19 |
| 3 | 26 | 2.187E-18 | 1.705E-18 | 1.416E-18 | 1.222E-18 | 8.198E-19 | 6.379E-19 | 5.297E-19 | 4.567E-19 | 3.452E-19 | 2.846E-19 | 2.436E-19 | 2.137E-19 | 1.912E-19 | 1.732E-19 | 1.586E-19 | 1.465E-19 |
| 3 | 27 | 4.286E-20 | 3.185E-20 | 2.547E-20 | 2.131E-20 | 1.313E-20 | 9.659E-21 | 7.686E-21 | 6.423E-21 | 4.633E-21 | 3.648E-21 | 3.015E-21 | 2.572E-21 | 2.245E-21 | 1.995E-21 | 1.796E-21 | 1.637E-21 |
| 4 | 6  | 1.067E-19 | 6.615E-20 | 4.868E-20 | 3.888E-20 | 2.236E-20 | 1.615E-20 | 1.280E-20 | 1.069E-20 | 7.624E-21 | 6.260E-21 | 5.197E-21 | 4.460E-21 | 3.917E-21 | 3.499E-21 | 3.167E-21 | 2.896E-21 |
| 4 | 7  | 2.986E-19 | 1.945E-19 | 1.466E-19 | 1.187E-19 | 7.033E-20 | 5.149E-20 | 4.117E-20 | 3.456E-20 | 2.512E-20 | 2.050E-20 | 1.711E-20 | 1.474E-20 | 1.298E-20 | 1.162E-20 | 1.054E-20 | 9.659E-21 |
| 4 | 8  | 1.971E-19 | 1.264E-19 | 9.396E-20 | 7.518E-20 | 4.314E-20 | 3.112E-20 | 2.469E-20 | 2.063E-20 | 1.429E-20 | 1.213E-20 | 1.011E-20 | 8.703E-21 | 7.664E-21 | 6.860E-21 | 6.219E-21 | 5.696E-21 |
| 4 | 9  | 3.194E-18 | 2.124E-18 | 1.618E-18 | 1.319E-18 | 7.919E-19 | 5.835E-19 | 4.683E-19 | 3.942E-19 | 2.784E-19 | 2.352E-19 | 1.967E-19 | 1.697E-19 | 1.496E-19 | 1.340E-19 | 1.216E-19 | 1.114E-19 |
| 4 | 12 | 3.307E-19 | 2.213E-19 | 1.681E-19 | 1.363E-19 | 8.045E-20 | 5.878E-20 | 4.697E-20 | 3.945E-20 | 2.887E-20 | 2.342E-20 | 1.960E-20 | 1.693E-20 | 1.498E-20 | 1.343E-20 | 1.220E-20 | 1.119E-20 |
| 4 | 13 | 6.562E-18 | 4.602E-18 | 3.600E-18 | 2.983E-18 | 1.847E-18 | 1.381E-18 | 1.118E-18 | 9.479E-19 | 6.861E-19 | 5.733E-19 | 4.825E-19 | 4.181E-19 | 3.700E-19 | 3.325E-19 | 3.025E-19 | 2.778E-19 |
| 4 | 14 | 1.718E-19 | 1.200E-19 | 9.362E-20 | 7.737E-20 | 4.756E-20 | 3.543E-20 | 2.864E-20 | 2.424E-20 | 1.767E-20 | 1.461E-20 | 1.229E-20 | 1.064E-20 | 9.429E-21 | 8.472E-21 | 7.705E-21 | 7.075E-21 |
| 4 | 15 | 9.127E-19 | 6.539E-19 | 5.173E-19 | 4.316E-19 | 2.707E-19 | 2.037E-19 | 1.656E-19 | 1.408E-19 | 1.042E-19 | 8.559E-20 | 7.225E-20 | 6.277E-20 | 5.567E-20 | 5.011E-20 | 4.564E-20 | 4.196E-20 |
| 4 | 16 | 7.683E-18 | 5.564E-18 | 4.430E-18 | 3.712E-18 | 2.350E-18 | 1.776E-18 | 1.448E-18 | 1.233E-18 | 9.159E-19 | 7.524E-19 | 6.361E-19 | 5.531E-19 | 4.908E-19 | 4.421E-19 | 4.028E-19 | 3.706E-19 |
| 4 | 17 | 6.072E-20 | 4.054E-20 | 3.018E-20 | 2.394E-20 | 1.309E-20 | 9.135E-21 | 7.086E-21 | 5.837E-21 | 4.113E-21 | 3.270E-21 | 2.702E-21 | 2.309E-21 | 2.111E-21 | 1.878E-21 | 1.694E-21 | 1.544E-21 |
| 4 | 18 | 8.513E-19 | 6.251E-19 | 5.015E-19 | 4.224E-19 | 2.699E-19 | 2.049E-19 | 1.675E-19 | 1.429E-19 | 1.067E-19 | 8.749E-20 | 7.410E-20 | 6.453E-20 | 5.734E-20 | 5.169E-20 | 4.714E-20 | 4.339E-20 |
| 4 | 19 | 4.512E-19 | 3.325E-19 | 2.672E-19 | 2.254E-19 | 1.444E-19 | 1.098E-19 | 8.988E-20 | 7.672E-20 | 5.742E-20 | 4.703E-20 | 3.987E-20 | 3.474E-20 | 3.087E-20 | 2.784E-20 | 2.540E-20 | 2.339E-20 |
| 4 | 21 | 2.935E-18 | 2.192E-18 | 1.775E-18 | 1.504E-18 | 9.726E-19 | 7.425E-19 | 6.092E-19 | 5.208E-19 | 3.914E-19 | 3.199E-19 | 2.715E-19 | 2.368E-19 | 2.111E-19 | 1.905E-19 | 1.739E-19 | 1.601E-19 |
| 4 | 23 | 1.452E-18 | 1.090E-18 | 8.865E-19 | 7.533E-19 | 4.903E-19 | 3.758E-19 | 3.091E-19 | 2.648E-19 | 1.997E-19 | 1.633E-19 | 1.389E-19 | 1.214E-19 | 1.081E-19 | 9.768E-20 | 8.925E-20 | 8.227E-20 |
| 4 | 24 | 2.942E-18 | 2.209E-18 | 1.795E-18 | 1.525E-18 | 9.917E-19 | 7.596E-19 | 6.245E-19 | 5.347E-19 | 4.032E-19 | 3.294E-19 | 2.801E-19 | 2.447E-19 | 2.181E-19 | 1.970E-19 | 1.799E-19 | 1.658E-19 |
| 4 | 25 | 8.199E-18 | 6.187E-18 | 5.044E-18 | 4.295E-18 | 2.807E-18 | 2.156E-18 | 1.776E-18 | 1.522E-18 | 1.149E-18 | 9.407E-19 | 8.007E-19 | 6.999E-19 | 6.235E-19 | 5.634E-19 | 5.149E-19 | 4.747E-19 |
| 4 | 26 | 1.506E-17 | 1.153E-17 | 9.486E-18 | 8.128E-18 | 5.378E-18 | 4.157E-18 | 3.437E-18 | 2.954E-18 | 2.233E-18 | 1.833E-18 | 1.564E-18 | 1.370E-18 | 1.222E-18 | 1.106E-18 | 1.01E-18  | 9.339E-19 |
| 4 | 27 | 1.246E-19 | 9.256E-20 | 7.423E-20 | 6.232E-20 | 3.891E-20 | 2.883E-20 | 2.307E-20 | 1.937E-20 | 1.396E-20 | 1.116E-20 | 9.257E-21 | 7.920E-21 | 7.328E-21 | 6.517E-21 | 5.875E-21 | 5.350E-21 |
| 5 | 7  | 3.228E-19 | 2.055E-19 | 1.535E-19 | 1.238E-19 | 7.274E-20 | 5.306E-20 | 4.232E-20 | 3.547E-20 | 2.444E-20 | 2.095E-20 | 1.743E-20 | 1.498E-20 | 1.317E-20 | 1.177E-20 | 1.066E-20 | 9.759E-21 |
| 5 | 11 | 1.774E-18 | 1.175E-18 | 8.920E-19 | 7.252E-19 | 4.322E-19 | 3.174E-19 | 2.543E-19 | 2.139E-19 | 1.553E-19 | 1.273E-19 | 1.064E-19 | 9.185E-20 | 8.099E-20 | 7.258E-20 | 6.587E-20 | 6.037E-20 |
| 5 | 14 | 3.719E-18 | 2.561E-18 | 1.985E-18 | 1.636E-18 | 1.002E-18 | 7.454E-19 | 6.018E-19 | 5.087E-19 | 3.629E-19 | 3.063E-19 | 2.571E-19 | 2.224E-19 | 1.966E-19 | 1.764E-19 | 1.603E-19 | 1.471E-19 |
| 5 | 16 | 1.006E-17 | 7.161E-18 | 5.647E-18 | 4.702E-18 | 2.940E-18 | 2.208E-18 | 1.794E-18 | 1.523E-18 | 1.107E-18 | 9.250E-19 | 7.799E-19 | 6.768E-19 | 5.995E-19 | 5.393E-19 | 4.909E-19 | 4.511E-19 |
| 5 | 23 | 4.822E-20 | 3.139E-20 | 2.274E-20 | 1.759E-20 | 8.918E-21 | 6.000E-21 | 4.592E-21 | 3.766E-21 | 2.583E-21 | 2.130E-21 | 1.785E-21 | 1.544E-21 | 1.366E-21 | 1.238E-21 | 1.118E-21 | 1.028E-21 |
| 5 | 27 | 3.451E-17 | 2.615E-17 | 2.137E-17 | 1.823E-17 | 1.196E-17 | 9.208E-18 | 7.593E-18 | 6.514E-18 | 4.921E-18 | 4.029E-18 | 3.432E-18 | 3.001E-18 | 2.674E-18 | 2.418E-18 | 2.210E-18 | 2.038E-18 |

**Table S15.** Cross sections (cm<sup>2</sup>) for Ge-like Cd<sup>16+</sup> for the transitions from initial to final levels with respective indices '*i*' and '*f*' and at scattered electron energies 50 – 5000 eV.

| Transition |          | 50        | 100       | 150       | 200       | 400       | 600       | 800       | 1000      | 1500      | 2000      | 2500      | 3000      | 3500      | 4000      | 4500      | 5000      |
|------------|----------|-----------|-----------|-----------|-----------|-----------|-----------|-----------|-----------|-----------|-----------|-----------|-----------|-----------|-----------|-----------|-----------|
| <i>i</i>   | <i>f</i> |           |           |           |           |           |           |           |           |           |           |           |           |           |           |           |           |
| 1          | 7        | 1.330E-17 | 9.270E-18 | 7.235E-18 | 5.987E-18 | 3.705E-18 | 2.771E-18 | 2.244E-18 | 1.903E-18 | 1.428E-18 | 1.148E-18 | 9.652E-19 | 8.360E-19 | 7.394E-19 | 6.644E-19 | 6.042E-19 | 5.548E-19 |
| 1          | 11       | 1.720E-18 | 1.236E-18 | 9.804E-19 | 8.199E-19 | 5.179E-19 | 3.912E-19 | 3.187E-19 | 2.714E-19 | 2.042E-19 | 1.651E-19 | 1.394E-19 | 1.211E-19 | 1.074E-19 | 9.670E-20 | 8.809E-20 | 8.101E-20 |
| 1          | 14       | 6.130E-18 | 4.515E-18 | 3.632E-18 | 3.064E-18 | 1.969E-18 | 1.500E-18 | 1.229E-18 | 1.050E-18 | 7.921E-19 | 6.438E-19 | 5.456E-19 | 4.754E-19 | 4.224E-19 | 3.809E-19 | 3.475E-19 | 3.199E-19 |
| 1          | 16       | 1.653E-18 | 1.247E-18 | 1.017E-18 | 8.664E-19 | 5.674E-19 | 4.363E-19 | 3.596E-19 | 3.086E-19 | 2.332E-19 | 1.906E-19 | 1.622E-19 | 1.417E-19 | 1.262E-19 | 1.140E-19 | 1.042E-19 | 9.603E-20 |
| 1          | 20       | 2.777E-17 | 2.134E-17 | 1.761E-17 | 1.512E-17 | 1.006E-17 | 7.798E-18 | 6.459E-18 | 5.560E-18 | 4.209E-18 | 3.457E-18 | 2.951E-18 | 2.585E-18 | 2.307E-18 | 2.088E-18 | 1.910E-18 | 1.763E-18 |
| 1          | 23       | 2.828E-19 | 2.202E-19 | 1.831E-19 | 1.582E-19 | 1.065E-19 | 8.309E-20 | 6.916E-20 | 5.973E-20 | 4.542E-20 | 3.721E-20 | 3.178E-20 | 2.787E-20 | 2.488E-20 | 2.256E-20 | 2.066E-20 | 1.929E-20 |
| 1          | 27       | 9.239E-20 | 7.256E-20 | 6.061E-20 | 5.250E-20 | 3.543E-20 | 2.766E-20 | 2.303E-20 | 1.990E-20 | 1.512E-20 | 1.238E-20 | 1.057E-20 | 9.269E-21 | 8.275E-21 | 7.500E-21 | 6.868E-21 | 6.417E-21 |
| 2          | 6        | 1.129E-18 | 7.361E-19 | 5.549E-19 | 4.494E-19 | 2.662E-19 | 1.950E-19 | 1.559E-19 | 1.310E-19 | 9.768E-20 | 7.760E-20 | 6.477E-20 | 5.580E-20 | 4.915E-20 | 4.401E-20 | 3.991E-20 | 3.656E-20 |
| 2          | 7        | 6.216E-20 | 3.679E-20 | 2.508E-20 | 1.850E-20 | 8.292E-21 | 5.184E-21 | 3.777E-21 | 2.988E-21 | 2.042E-21 | 1.562E-21 | 1.280E-21 | 1.093E-21 | 9.583E-22 | 8.562E-22 | 7.756E-22 | 7.101E-22 |
| 2          | 8        | 6.541E-18 | 4.468E-18 | 3.450E-18 | 2.837E-18 | 1.733E-18 | 1.288E-18 | 1.039E-18 | 8.784E-19 | 6.583E-19 | 5.269E-19 | 4.420E-19 | 3.821E-19 | 3.375E-19 | 3.029E-19 | 2.752E-19 | 2.524E-19 |
| 2          | 10       | 1.766E-18 | 1.238E-18 | 9.695E-19 | 8.040E-19 | 4.996E-19 | 3.744E-19 | 3.036E-19 | 2.576E-19 | 1.935E-19 | 1.557E-19 | 1.310E-19 | 1.136E-19 | 1.005E-19 | 9.033E-20 | 8.218E-20 | 7.549E-20 |
| 2          | 11       | 4.579E-18 | 3.222E-18 | 2.527E-18 | 2.098E-18 | 1.306E-18 | 9.795E-19 | 7.946E-19 | 6.747E-19 | 5.069E-19 | 4.080E-19 | 3.436E-19 | 2.979E-19 | 2.637E-19 | 2.370E-19 | 2.157E-19 | 1.981E-19 |
| 2          | 12       | 2.770E-20 | 1.639E-20 | 1.098E-20 | 7.910E-21 | 3.181E-21 | 1.802E-21 | 1.213E-21 | 9.037E-22 | 5.492E-22 | 3.936E-22 | 3.090E-22 | 2.722E-22 | 2.343E-22 | 2.064E-22 | 1.848E-22 | 1.675E-22 |
| 2          | 13       | 2.291E-19 | 1.606E-19 | 1.249E-19 | 1.028E-19 | 6.253E-20 | 4.645E-20 | 3.752E-20 | 3.179E-20 | 2.375E-20 | 1.916E-20 | 1.617E-20 | 1.405E-20 | 1.246E-20 | 1.122E-20 | 1.022E-20 | 9.402E-21 |
| 2          | 14       | 5.413E-18 | 3.915E-18 | 3.116E-18 | 2.612E-18 | 1.656E-18 | 1.253E-18 | 1.022E-18 | 8.713E-19 | 6.560E-19 | 5.310E-19 | 4.489E-19 | 3.903E-19 | 3.463E-19 | 3.119E-19 | 2.842E-19 | 2.614E-19 |
| 2          | 15       | 5.910E-19 | 4.312E-19 | 3.441E-19 | 2.886E-19 | 1.825E-19 | 1.374E-19 | 1.115E-19 | 9.468E-20 | 7.044E-20 | 5.674E-20 | 4.775E-20 | 4.215E-20 | 3.726E-20 | 3.346E-20 | 3.041E-20 | 2.790E-20 |
| 2          | 16       | 2.867E-18 | 2.126E-18 | 1.716E-18 | 1.452E-18 | 9.375E-19 | 7.159E-19 | 5.873E-19 | 5.026E-19 | 3.792E-19 | 3.087E-19 | 2.619E-19 | 2.283E-19 | 2.030E-19 | 1.832E-19 | 1.672E-19 | 1.539E-19 |
| 2          | 18       | 1.009E-17 | 7.614E-18 | 6.213E-18 | 5.295E-18 | 3.475E-18 | 2.675E-18 | 2.205E-18 | 1.893E-18 | 1.431E-18 | 1.170E-18 | 9.958E-19 | 8.705E-19 | 7.756E-19 | 7.009E-19 | 6.405E-19 | 5.906E-19 |
| 2          | 20       | 1.648E-18 | 1.244E-18 | 1.015E-18 | 8.649E-19 | 5.669E-19 | 4.363E-19 | 3.597E-19 | 3.088E-19 | 2.333E-19 | 1.909E-19 | 1.625E-19 | 1.421E-19 | 1.266E-19 | 1.145E-19 | 1.046E-19 | 9.649E-20 |
| 2          | 21       | 7.730E-18 | 5.918E-18 | 4.871E-18 | 4.176E-18 | 2.770E-18 | 2.144E-18 | 1.775E-18 | 1.527E-18 | 1.155E-18 | 9.481E-19 | 8.089E-19 | 7.083E-19 | 6.319E-19 | 5.717E-19 | 5.229E-19 | 4.825E-19 |
| 2          | 22       | 2.598E-18 | 1.992E-18 | 1.641E-18 | 1.408E-18 | 9.348E-19 | 7.240E-19 | 5.993E-19 | 5.158E-19 | 3.903E-19 | 3.204E-19 | 2.734E-19 | 2.394E-19 | 2.136E-19 | 1.933E-19 | 1.768E-19 | 1.632E-19 |
| 2          | 23       | 5.731E-18 | 4.403E-18 | 3.633E-18 | 3.119E-18 | 2.075E-18 | 1.609E-18 | 1.332E-18 | 1.147E-18 | 8.683E-19 | 7.132E-19 | 6.088E-19 | 5.334E-19 | 4.760E-19 | 4.307E-19 | 3.941E-19 | 3.637E-19 |
| 2          | 25       | 2.853E-18 | 2.196E-18 | 1.813E-18 | 1.558E-18 | 1.037E-18 | 8.046E-19 | 6.667E-19 | 5.741E-19 | 4.345E-19 | 3.570E-19 | 3.049E-19 | 2.672E-19 | 2.385E-19 | 2.159E-19 | 1.975E-19 | 1.823E-19 |
| 2          | 27       | 1.445E-19 | 1.116E-19 | 9.229E-20 | 7.937E-20 | 5.289E-20 | 4.110E-20 | 3.414E-20 | 2.945E-20 | 2.238E-20 | 1.832E-20 | 1.564E-20 | 1.372E-20 | 1.225E-20 | 1.110E-20 | 1.017E-20 | 9.498E-21 |
| 3          | 6        | 6.107E-19 | 3.932E-19 | 2.944E-19 | 2.374E-19 | 1.393E-19 | 1.016E-19 | 8.106E-20 | 6.800E-20 | 5.061E-20 | 4.013E-20 | 3.346E-20 | 2.880E-20 | 2.535E-20 | 2.269E-20 | 2.057E-20 | 1.884E-20 |
| 3          | 7        | 3.881E-19 | 2.607E-19 | 1.994E-19 | 1.629E-19 | 9.812E-20 | 7.245E-20 | 5.821E-20 | 4.909E-20 | 3.667E-20 | 2.928E-20 | 2.452E-20 | 2.119E-20 | 1.870E-20 | 1.677E-20 | 1.523E-20 | 1.397E-20 |
| 3          | 8        | 1.347E-19 | 8.742E-20 | 6.496E-20 | 5.183E-20 | 2.946E-20 | 2.116E-20 | 1.675E-20 | 1.400E-20 | 1.033E-20 | 8.201E-21 | 6.849E-21 | 5.920E-21 | 5.220E-21 | 4.679E-21 | 4.247E-21 | 3.894E-21 |
| 3          | 9        | 3.085E-18 | 2.102E-18 | 1.619E-18 | 1.329E-18 | 8.078E-19 | 5.991E-19 | 4.828E-19 | 4.080E-19 | 3.055E-19 | 2.445E-19 | 2.051E-19 | 1.773E-19 | 1.566E-19 | 1.405E-19 | 1.277E-19 | 1.171E-19 |
| 3          | 11       | 2.746E-19 | 1.903E-19 | 1.477E-19 | 1.217E-19 | 7.453E-20 | 5.549E-20 | 4.483E-20 | 3.796E-20 | 2.844E-20 | 2.284E-20 | 1.921E-20 | 1.664E-20 | 1.472E-20 | 1.322E-20 | 1.203E-20 | 1.104E-20 |
| 3          | 12       | 6.354E-18 | 4.451E-18 | 3.482E-18 | 2.887E-18 | 1.791E-18 | 1.342E-18 | 1.087E-18 | 9.225E-19 | 6.928E-19 | 5.572E-19 | 4.689E-19 | 4.063E-19 | 3.596E-19 | 3.231E-19 | 2.940E-19 | 2.700E-19 |
| 3          | 13       | 6.881E-19 | 4.890E-19 | 3.848E-19 | 3.199E-19 | 1.991E-19 | 1.493E-19 | 1.211E-19 | 1.029E-19 | 7.714E-20 | 6.218E-20 | 5.240E-20 | 4.559E-20 | 4.037E-20 | 3.631E-20 | 3.304E-20 | 3.036E-20 |
| 3          | 14       | 9.685E-18 | 6.966E-18 | 5.530E-18 | 4.627E-18 | 2.924E-18 | 2.209E-18 | 1.800E-18 | 1.534E-18 | 1.154E-18 | 9.331E-19 | 7.881E-19 | 6.848E-19 | 6.073E-19 | 5.467E-19 | 4.981E-19 | 4.580E-19 |
| 3          | 15       | 1.272E-18 | 9.283E-19 | 7.423E-19 | 6.238E-19 | 3.975E-19 | 3.016E-19 | 2.465E-19 | 2.104E-19 | 1.583E-19 | 1.285E-19 | 1.088E-19 | 9.484E-20 | 8.423E-20 | 7.592E-20 | 6.924E-20 | 6.373E-20 |
| 3          | 16       | 4.007E-20 | 2.802E-20 | 2.161E-20 | 1.763E-20 | 1.041E-20 | 7.598E-21 | 6.078E-21 | 5.115E-21 | 3.777E-21 | 3.029E-21 | 2.545E-21 | 2.226E-21 | 1.968E-21 | 1.768E-21 | 1.608E-21 | 1.476E-21 |
| 3          | 17       | 1.963E-18 | 1.449E-18 | 1.167E-18 | 9.854E-19 | 6.350E-19 | 4.843E-19 | 3.969E-19 | 3.394E-19 | 2.566E-19 | 2.080E-19 | 1.765E-19 | 1.542E-19 | 1.371E-19 | 1.237E-19 | 1.129E-19 | 1.040E-19 |
| 3          | 18       | 4.880E-18 | 3.654E-18 | 2.968E-18 | 2.521E-18 | 1.642E-18 | 1.259E-18 | 1.036E-18 | 8.875E-19 | 6.700E-19 | 5.468E-19 | 4.647E-19 | 4.059E-19 | 3.613E-19 | 3.263E-19 | 2.980E-19 | 2.746E-19 |
| 3          | 20       | 2.129E-19 | 1.569E-19 | 1.258E-19 | 1.058E-19 | 6.721E-20 | 5.078E-20 | 4.135E-20 | 3.520E-20 | 2.625E-20 | 2.125E-20 | 1.795E-20 | 1.583E-20 | 1.403E-20 | 1.263E-20 | 1.150E-20 | 1.057E-20 |
| 3          | 21       | 3.844E-18 | 2.922E-18 | 2.395E-18 | 2.047E-18 | 1.348E-18 | 1.040E-18 | 8.589E-19 | 7.380E-19 | 5.580E-19 | 4.571E-19 | 3.894E-19 | 3.407E-19 | 3.036E-19 | 2.745E-19 | 2.510E-19 | 2.315E-19 |
| 3          | 23       | 1.195E-18 | 9.120E-19 | 7.492E-19 | 6.413E-19 | 4.239E-19 | 3.276E-19 | 2.708E-19 | 2.328E-19 | 1.760E-19 | 1.443E-19 | 1.230E-19 | 1.078E-19 | 9.609E-20 | 8.690E-20 | 7.946E-20 | 7.331E-20 |
| 3          | 24       | 1.479E-17 | 1.132E-17 | 9.321E-18 | 7.991E-18 | 5.303E-18 | 4.105E-18 | 3.397E-18 | 2.923E-18 | 2.212E-18 | 1.815E-18 | 1.549E-18 | 1.356E-18 | 1.210E-18 | 1.094E-18 | 1.001E-18 | 9.238E-19 |
| 3          | 25       | 2.255E-18 | 1.726E-18 | 1.421E-18 | 1.218E-18 | 8.079E-19 | 6.252E-19 | 5.172E-19 | 4.449E-19 | 3.364E-19 | 2.760E-19 | 2.355E-19 | 2.064E-19 | 1.841E-19 | 1.665E-19 | 1.523E-19 | 1.405E-19 |
| 3          | 26       | 2.462E-18 | 1.909E-18 | 1.584E-18 | 1.365E-18 | 9.152E-19 | 7.121E-19 | 5.912E-19 | 5.097E-19 | 3.858E-19 | 3.177E-19 | 2.716E-19 | 2.385E-19 | 2.130E-19 | 1.929E-19 | 1.766E-19 | 1.631E-19 |
| 3          | 27       | 4.710E-20 | 3.465E-20 | 2.756E-20 | 2.298E-20 | 1.408E-20 | 1.032E-20 | 8.200E-21 | 6.849E-21 | 4.933E-21 | 3.872E-21 | 3.196E-21 | 2.723E-21 | 2.378E-21 | 2.111E-21 | 1.896E-21 | 1.725E-21 |
| 4          | 6        | 1.073E-19 | 6.616E-20 | 4.854E-20 | 3.871E-20 | 2.218E-20 | 1.600E-20 | 1.267E-20 | 1.058E-20 | 7.834E-21 | 6.171E-21 | 5.122E-21 | 4.395E-21 | 3.860E-21 | 3.448E-21 | 3.120E-21 | 2.853E-21 |
| 4          | 7        | 3.196E-19 | 2.074E-19 | 1.561E-19 | 1.263E-19 | 7.468E-20 | 5.466E-20 | 4.369E-20 | 3.670E-20 | 2.734E-20 | 2.171E-20 | 1.811E-20 | 1.560E-20 | 1.374E-20 | 1.230E-20 | 1.116E-20 | 1.022E-20 |
| 4          | 8        | 1.953E-19 | 1.242E-19 | 9.177E-20 | 7.316E-20 | 4.169E-20 | 3.000E-20 | 2.377E-20 | 1.986E-20 | 1.469E-20 | 1.163E-20 | 9.689E-21 | 8.339E-21 | 7.340E-21 | 6.595E-21 | 5.955E-21 | 5.453E-21 |
| 4          | 9        | 3.304E-18 | 2.186E-18 | 1.662E-18 | 1.354E-18 | 8.114E-19 | 5.977E-19 | 4.795E-19 | 4.038E-19 | 3.018E-19 | 2.403E-19 | 2.008E-19 | 1.731E-19 | 1.526E-19 | 1.367E-19 | 1.240E-19 | 1.136E-19 |

|   |    |           |           |           |           |           |           |           |           |           |           |           |           |           |           |           |           |
|---|----|-----------|-----------|-----------|-----------|-----------|-----------|-----------|-----------|-----------|-----------|-----------|-----------|-----------|-----------|-----------|-----------|
| 4 | 11 | 1.972E-20 | 1.115E-20 | 7.258E-21 | 5.114E-21 | 1.920E-21 | 1.036E-21 | 6.735E-22 | 4.873E-22 | 2.849E-22 | 1.991E-22 | 1.549E-22 | 1.296E-22 | 1.118E-22 | 9.880E-23 | 8.887E-23 | 8.095E-23 |
| 4 | 12 | 2.543E-19 | 1.671E-19 | 1.253E-19 | 1.007E-19 | 5.820E-20 | 4.213E-20 | 3.349E-20 | 2.807E-20 | 2.076E-20 | 1.651E-20 | 1.380E-20 | 1.195E-20 | 1.054E-20 | 9.448E-21 | 8.577E-21 | 7.864E-21 |
| 4 | 13 | 7.626E-18 | 5.318E-18 | 4.151E-18 | 3.435E-18 | 2.124E-18 | 1.588E-18 | 1.286E-18 | 1.090E-18 | 8.185E-19 | 6.576E-19 | 5.530E-19 | 4.791E-19 | 4.238E-19 | 3.807E-19 | 3.462E-19 | 3.179E-19 |
| 4 | 14 | 1.259E-19 | 8.736E-20 | 6.786E-20 | 5.593E-20 | 3.423E-20 | 2.546E-20 | 2.055E-20 | 1.739E-20 | 1.302E-20 | 1.044E-20 | 8.775E-21 | 7.612E-21 | 6.729E-21 | 6.044E-21 | 5.495E-21 | 5.044E-21 |
| 4 | 15 | 8.634E-19 | 6.164E-19 | 4.869E-19 | 4.059E-19 | 2.546E-19 | 1.917E-19 | 1.559E-19 | 1.326E-19 | 9.964E-20 | 8.046E-20 | 6.790E-20 | 5.900E-20 | 5.229E-20 | 4.706E-20 | 4.286E-20 | 3.941E-20 |
| 4 | 16 | 8.606E-18 | 6.199E-18 | 4.924E-18 | 4.121E-18 | 2.607E-18 | 1.970E-18 | 1.606E-18 | 1.368E-18 | 1.030E-18 | 8.329E-19 | 7.036E-19 | 6.115E-19 | 5.423E-19 | 4.883E-19 | 4.449E-19 | 4.092E-19 |
| 4 | 17 | 6.216E-20 | 4.046E-20 | 2.954E-20 | 2.308E-20 | 1.216E-20 | 8.306E-21 | 6.364E-21 | 5.202E-21 | 3.661E-21 | 2.843E-21 | 2.331E-21 | 2.098E-21 | 1.826E-21 | 1.619E-21 | 1.455E-21 | 1.323E-21 |
| 4 | 18 | 1.027E-18 | 7.521E-19 | 6.029E-19 | 5.076E-19 | 3.246E-19 | 2.467E-19 | 2.017E-19 | 1.722E-19 | 1.298E-19 | 1.053E-19 | 8.915E-20 | 7.765E-20 | 6.895E-20 | 6.215E-20 | 5.667E-20 | 5.215E-20 |
| 4 | 20 | 4.229E-19 | 3.107E-19 | 2.495E-19 | 2.103E-19 | 1.349E-19 | 1.026E-19 | 8.403E-20 | 7.180E-20 | 5.413E-20 | 4.398E-20 | 3.726E-20 | 3.246E-20 | 2.884E-20 | 2.601E-20 | 2.373E-20 | 2.184E-20 |
| 4 | 21 | 3.744E-18 | 2.785E-18 | 2.253E-18 | 1.908E-18 | 1.234E-18 | 9.431E-19 | 7.739E-19 | 6.623E-19 | 4.992E-19 | 4.065E-19 | 3.449E-19 | 3.013E-19 | 2.679E-19 | 2.417E-19 | 2.206E-19 | 2.032E-19 |
| 4 | 23 | 1.469E-18 | 1.099E-18 | 8.917E-19 | 7.570E-19 | 4.928E-19 | 3.779E-19 | 3.108E-19 | 2.664E-19 | 2.011E-19 | 1.642E-19 | 1.396E-19 | 1.219E-19 | 1.085E-19 | 9.801E-20 | 8.952E-20 | 8.251E-20 |
| 4 | 24 | 3.287E-18 | 2.459E-18 | 1.995E-18 | 1.694E-18 | 1.102E-18 | 8.445E-19 | 6.943E-19 | 5.950E-19 | 4.489E-19 | 3.663E-19 | 3.113E-19 | 2.721E-19 | 2.422E-19 | 2.187E-19 | 1.998E-19 | 1.841E-19 |
| 4 | 25 | 8.494E-18 | 6.382E-18 | 5.195E-18 | 4.420E-18 | 2.889E-18 | 2.220E-18 | 1.828E-18 | 1.568E-18 | 1.185E-18 | 9.679E-19 | 8.233E-19 | 7.193E-19 | 6.405E-19 | 5.787E-19 | 5.287E-19 | 4.874E-19 |
| 4 | 26 | 1.649E-17 | 1.258E-17 | 1.033E-17 | 8.848E-18 | 5.860E-18 | 4.531E-18 | 3.747E-18 | 3.222E-18 | 2.438E-18 | 1.999E-18 | 1.705E-18 | 1.492E-18 | 1.331E-18 | 1.204E-18 | 1.101E-18 | 1.016E-18 |
| 4 | 27 | 1.418E-19 | 1.046E-19 | 8.362E-20 | 7.008E-20 | 4.362E-20 | 3.226E-20 | 2.579E-20 | 2.164E-20 | 1.572E-20 | 1.241E-20 | 1.028E-20 | 9.292E-21 | 8.119E-21 | 7.217E-21 | 6.501E-21 | 5.916E-21 |
| 5 | 7  | 3.404E-19 | 2.162E-19 | 1.613E-19 | 1.300E-19 | 7.640E-20 | 5.573E-20 | 4.444E-20 | 3.725E-20 | 2.774E-20 | 2.194E-20 | 1.825E-20 | 1.569E-20 | 1.379E-20 | 1.233E-20 | 1.116E-20 | 1.021E-20 |
| 5 | 11 | 1.746E-18 | 1.148E-18 | 8.686E-19 | 7.048E-19 | 4.189E-19 | 3.074E-19 | 2.461E-19 | 2.070E-19 | 1.544E-19 | 1.228E-19 | 1.026E-19 | 8.849E-20 | 7.800E-20 | 6.988E-20 | 6.341E-20 | 5.811E-20 |
| 5 | 14 | 4.045E-18 | 2.775E-18 | 2.148E-18 | 1.769E-18 | 1.083E-18 | 8.062E-19 | 6.508E-19 | 5.506E-19 | 4.128E-19 | 3.307E-19 | 2.775E-19 | 2.400E-19 | 2.120E-19 | 1.903E-19 | 1.729E-19 | 1.586E-19 |
| 5 | 16 | 1.119E-17 | 7.913E-18 | 6.224E-18 | 5.175E-18 | 3.231E-18 | 2.427E-18 | 1.970E-18 | 1.674E-18 | 1.258E-18 | 1.014E-18 | 8.539E-19 | 7.406E-19 | 6.557E-19 | 5.896E-19 | 5.366E-19 | 4.930E-19 |
| 5 | 20 | 4.764E-21 | 2.824E-21 | 1.894E-21 | 1.376E-21 | 5.730E-22 | 3.393E-22 | 2.424E-22 | 1.925E-22 | 1.288E-22 | 9.969E-23 | 8.405E-23 | 7.285E-23 | 6.434E-23 | 5.797E-23 | 5.300E-23 | 4.872E-23 |
| 5 | 23 | 4.492E-20 | 2.803E-20 | 1.960E-20 | 1.471E-20 | 6.831E-21 | 4.375E-21 | 3.255E-21 | 2.624E-21 | 1.824E-21 | 1.431E-21 | 1.192E-21 | 1.028E-21 | 9.070E-22 | 8.143E-22 | 7.405E-22 | 6.801E-22 |
| 5 | 27 | 3.795E-17 | 2.864E-17 | 2.338E-17 | 1.993E-17 | 1.308E-17 | 1.007E-17 | 8.299E-18 | 7.124E-18 | 5.385E-18 | 4.403E-18 | 3.748E-18 | 3.276E-18 | 2.918E-18 | 2.637E-18 | 2.410E-18 | 2.222E-18 |

**Table S16.** Fitting coefficients for Ge-like Te<sup>20+</sup> ion

| Lower level | Upper level | b <sub>0</sub> | b <sub>1</sub> | b <sub>2</sub> | b <sub>3</sub> | c <sub>0</sub> | c <sub>1</sub> | c <sub>2</sub> | d <sub>0</sub> | d <sub>1</sub> |
|-------------|-------------|----------------|----------------|----------------|----------------|----------------|----------------|----------------|----------------|----------------|
| 2           | 6           | 2.784          | 1.124E-1       | 1.501E-4       |                | 2.484E+1       | 1.615E+1       | 3.022E-1       | -5.540E-3      | 6.941E-2       |
| 3           | 6           | 2.214E+2       | 1.135E+1       |                |                | 3.938E+3       | 2.811E+3       | 7.729E+1       | 1.444E-4       | 3.137E-2       |
| 4           | 6           | 2.546          | 1.104E-1       |                |                | 2.737E+2       | 2.774E+2       | 6.049          | 1.380E-3       | 3.200E-3       |
| 1           | 7           | 6.695E+1       | 2.568          |                |                | 1.067E+2       | 4.691E+1       | 7.620E-1       | -3.585E-1      | 6.660E-1       |
| 2           | 7           | 9.106E+1       | 1.768E+1       | 1.592E+37      |                | 2.769E+4       | 1.623E+4       | 3.796E+3       | 1.350E-3       | 9.016E-4       |
| 3           | 7           | 5.664          | 2.193E-1       |                |                | 1.422E+2       | 7.916E+1       | 1.381          | -7.540E-3      | 3.018-2        |
| 4           | 7           | 2.169E+41      | 1.195E+40      |                |                | 1.150E+43      | 8.889E+42      | 2.620E+41      | 6.805E-4       | 9.700E-3       |
| 5           | 7           | 1.009E+43      | 4.644E+41      |                |                | 4.355E+44      | 3.888E+44      | 8.629E+42      | 2.440E-3       | 9.720E-3       |
| 2           | 8           | 5.947E+1       | 2.287          |                |                | 2.325E+2       | 1.167E+2       | 1.970          | -8.411E-2      | 2.242E-1       |
| 3           | 8           | 1.105          | 1.838E-2       |                |                | 1.359E+2       | 7.277E+1       | 5.278E-1       | -4.656E-4      | 5.200E-3       |
| 4           | 8           | 6.934E+2       | 1.890E+1       |                |                | 4.167E+4       | 2.901E+4       | 3.871E+2       | 1.000E-3       | 8.290E-3       |
| 3           | 9           | 1.050E+16      | 3.677E+14      | 7.496E-2       |                | 9.109E+16      | 4.475E+16      | 6.928E+14      | -3.790E-2      | 1.008E-1       |
| 4           | 9           | 9.701E+2       | 5.282E+1       |                |                | 4.648E+3       | 3.053E+3       | 8.686E+1       | -1.561E-2      | 1.341E-1       |
| 2           | 10          | -5.320         | 3.180          |                |                | -7.498E+1      | 1.783E+1       | 1.714E+1       | -4.507E-2      | 8.069E-2       |
| 1           | 11          | 6.286E+42      | 2.368E+41      |                |                | 1.132E+44      | 4.094E+43      | 6.219E+41      | -5.916E-2      | 7.746E-2       |

|   |    |            |            |            |           |            |            |            |           |          |
|---|----|------------|------------|------------|-----------|------------|------------|------------|-----------|----------|
| 2 | 11 | 6.880E+1   | 2.612      |            |           | 3.169E+2   | 1.333E+2   | 2.122      | -1.432E-1 | 2.443E-1 |
| 3 | 11 | 4.681E+7   | 1.456E+6   |            |           | 5.119E+9   | 2.251E+9   | 3.041E+7   | -4.380E-3 | 9.020E-3 |
| 4 | 11 | 8.798E+24  | -3.561E+22 |            |           | 3.231E+27  | 1.886E+27  | -1.201E+25 | 3.184E-4  | 1.250E-3 |
| 5 | 11 | 2.396      | 9.213E-2   |            |           | 1.785E+1   | 1.114E+1   | 1.982E-1   | -9.700E-3 | 8.646E-2 |
| 2 | 12 | 4.686      | 2.191E-2   |            |           | 9.694E+2   | 4.209E+2   | -1.203E-1  | -8.278E-4 | 3.600E-3 |
| 3 | 12 | 7.760E+1   | 2.922      |            |           | 2.770E+2   | 1.193E+2   | 1.900      | -1.681E-1 | 3.035E-1 |
| 4 | 12 | 5.615      | 1.900E-1   |            |           | 1.460E+2   | 7.875E+1   | 1.218      | -6.940E-3 | 2.896E-2 |
| 1 | 13 | 6.195E+1   | 2.272      |            |           | 3.088E+2   | 1.005E+2   | 1.446      | -2.846E-1 | 3.229E-1 |
| 2 | 13 | 7.261E+1   | 2.686      |            |           | 3.647E+2   | 1.362E+2   | 2.055      | -1.892E-1 | 2.631E-1 |
| 3 | 13 | 1.628E+2   | 6.162      |            |           | 4.406E+2   | 1.703E+2   | 2.644      | -3.209E-1 | 4.690E-1 |
| 4 | 13 | 7.427E+17  | 2.755E+16  |            |           | 4.134E+19  | 1.947E+19  | 3.153E+17  | -7.270E-3 | 1.692E-2 |
| 5 | 13 | 6.781E+4   | 3.611E+3   | 5.499      |           | 3.407E+5   | 1.865E+5   | 5.066E+3   | -5.343E-2 | 1.640E-1 |
| 2 | 15 | 5.985E+22  | 9.620E+20  |            |           | 9.772E+24  | 3.665E+24  | 2.326E+22  | -3.210E-3 | 6.290E-3 |
| 3 | 15 | 2.676E+1   | -1.373E-1  |            |           | 8.626E+3   | 3.461E+3   | -2.343E+1  | 1.280E-3  | 1.720E-3 |
| 4 | 15 | 6.072E+1   | 2.272      |            |           | 2.722E+2   | 1.237E+2   | 1.990      | -1.079E-1 | 2.228E-1 |
| 2 | 14 | 3.593E+1   | 1.631      | 1.930E-3   |           | 1.037E+3   | 3.720E+2   | 8.007      | -3.255E-2 | 4.760E-2 |
| 3 | 14 | 8.788E+42  | 3.177E+41  |            |           | 1.074E+44  | 3.796E+43  | 5.519E+41  | -9.125E-2 | 1.163E-1 |
| 4 | 14 | 9.395E+1   | 3.487      |            |           | 1.111E+3   | 4.679E+2   | 7.329      | -5.376E-2 | 9.393E-2 |
| 3 | 16 | 3.373E+2   | 1.254E+1   |            |           | 2.885E+3   | 9.664E+2   | 14.12      | -1.581E-1 | 1.825E-1 |
| 4 | 16 | 4.976      | 3.559E-2   |            |           | 1.240E+3   | 5.129E+2   | 8.678E-1   | -2.045E-4 | 3.010E-3 |
| 1 | 19 | 8.872E+1   | 3.242      |            |           | 5.549E+2   | 1.550E+2   | 2.119      | -3.426E-1 | 3.221E-1 |
| 2 | 19 | 1.271E+42  | 4.570E+40  |            |           | 2.045E+43  | 6.447E+42  | 9.043E+40  | -9.478E-2 | 1.039E-1 |
| 3 | 19 | -4.859E+40 |            |            |           | -3.790E+43 | -1.288E+43 | 4.274E+40  | 4.339E-5  | 1.050E-3 |
| 4 | 19 | 9.314E+1   | 3.487      |            |           | 3.277E+2   | 1.256E+2   | 1.928      | -2.515E-1 | 3.636E-1 |
| 5 | 19 | 1.853E+2   | 6.987      |            |           | 4.491E+2   | 1.881E+2   | 2.979      | -2.717E-1 | 4.651E-1 |
| 2 | 18 | 9.111      | 3.444E-1   |            |           | 2.240E+1   | 6.898      | 9.950E-2   | -7.025E-1 | 7.240E-1 |
| 3 | 18 | 1.919E+1   | 7.048E-1   |            |           | 1.120E+2   | 3.555E+1   | 5.077E-1   | -2.624E-1 | 2.866E-1 |
| 4 | 18 | 8.753E+1   | 4.313      | 6.470E-3   |           | 2.755E+3   | 1.071E+3   | 2.504E+1   | -3.019E-2 | 4.201E-2 |
| 1 | 17 | 7.338      | 2.693E-1   |            |           | 8.834      | 2.381      | 3.225E-2   | -1.613    | 1.682    |
| 2 | 17 | 1.260E+3   | 4.607E+1   |            |           | 1.158E+4   | 3.514E+3   | 4.909E+1   | -1.900E-1 | 1.950E-1 |
| 3 | 17 | 1.235E+41  | 2.216E+39  | -1.022E+37 | 5.317E+34 | 2.086E+43  | 6.541E+42  | 2.809E+40  | -4.360E-3 | 7.660E-3 |
| 4 | 17 | 1.755E+16  | 8.526E+14  | 1.231E+12  |           | 3.134E+17  | 1.195E+17  | 2.720E+15  | -5.693E-2 | 7.625E-2 |
| 5 | 17 | 8.231      | 3.919E-1   | 6.402E-4   |           | 4.887E+2   | 2.025E+2   | 4.809      | -1.186E-2 | 1.966E-2 |
| 2 | 21 | 5.347E+1   | 1.961      |            |           | 1.981E+2   | 5.461E+1   | 7.438E-1   | -6.048E-1 | 5.571E-1 |
| 3 | 21 | 1.802E+1   | 6.52E-1    |            |           | 1.023E+2   | 2.902E+1   | 3.955E-1   | -3.614E-1 | 3.459E-1 |



|   |    |            |            |           |           |  |            |            |            |           |          |
|---|----|------------|------------|-----------|-----------|--|------------|------------|------------|-----------|----------|
| 4 | 21 | 1.637      |            |           |           |  | 2.274E+1   | 5.754      | -3.538E-2  | -9.351E-2 | 1.148E-1 |
| 2 | 22 | 1.532E+6   | 5.615E+4   |           |           |  | 1.733E+7   | 4.736E+6   | 6.433E+4   | -2.017E-1 | 1.845E-1 |
| 3 | 26 | 1.223E+1   | 4.530E-1   |           |           |  | 2.483E+1   | 6.889      | 9.469E-2   | -1.097    | 1.012    |
| 4 | 26 | 3.417E+2   | 1.237E+1   |           |           |  | 3.152E+3   | 1.014E+3   | 1.443E+1   | -1.568E-1 | 1.761E-1 |
| 1 | 24 | -1.896E+37 |            |           |           |  | -6.095E+39 | -1.075E+39 | 6.732E+36  | -8.240E-3 | 7.560E-3 |
| 2 | 24 | 1.700E+1   | 6.222E-1   |           |           |  | 9.557E+1   | 2.578E+1   | 3.484E-1   | -3.440E-1 | 3.593E-1 |
| 3 | 24 | -4.727     | -1.957E-1  | -1.657E-4 |           |  | -1.315E+2  | -3.743E+1  | -6.392E-1  | -7.724E-2 | 7.243E-2 |
| 4 | 24 | 3.618E+9   | 1.628E+8   | 1.839E+5  |           |  | 4.760E+10  | 1.577E+10  | 3.106E+8   | -1.150E-1 | 1.259E-1 |
| 5 | 24 | 2.411E+34  | -7.755E+30 |           |           |  | 5.548E+36  | 2.099E+36  | -8.558E+33 | -1.800E-3 | 3.850E-3 |
| 2 | 25 | 9.884E+1   | 4.021      | 3.050E-3  |           |  | 1.718E+3   | 4.673E+2   | 7.664      | -1.136E-1 | 1.174E-1 |
| 3 | 25 | -1.051E+10 | 1.889E+9   | 3.495E+7  | -2.061E+5 |  | -2.614E+11 | -1.292E+10 | 1.259E+10  | -8.929E-2 | 8.320E-2 |
| 4 | 25 | 8.426      | 3.160E-1   |           |           |  | 2.194E+1   | 6.878      | 9.923E-2   | -6.265E-1 | 6.630E-1 |
| 3 | 23 | 6.194E+4   | 2.531E+3   | 1.838     |           |  | 8.523E+5   | 2.245E+5   | 3.658E+3   | -1.563E-1 | 1.557E-1 |
| 4 | 23 | 1.034E+1   | 3.894E-1   |           |           |  | 1.681E+1   | 4.924      | 6.965E-2   | -1.212    | 1.177    |
| 1 | 27 | 8.645E+41  | 3.566E+40  | 4.194E+37 |           |  | 3.828E+44  | 9.001E+43  | 1.513E+42  | -6.640E-3 | 5.740E-3 |
| 2 | 27 | 3.109E+3   | 9.867E+1   |           |           |  | 5.508E+5   | 1.378E+5   | 1.585E+3   | -1.294E-2 | 1.227E-2 |
| 3 | 27 | 6.511E+40  | 1.501E+39  | 5.103E+35 |           |  | 3.890E+43  | 1.086E+43  | 1.563E+41  | 2.300E-3  | 1.280E-3 |
| 4 | 27 | 6.989E+41  | 3.072E+40  | 3.703E+37 |           |  | 1.426E+44  | 4.615E+43  | 1.213E+42  | 3.897E-4  | 5.290E-3 |
| 5 | 27 | 8.807      | 3.329E-1   |           |           |  | 6.262      | 1.925      | 2.779E-2   | -2.430    | 2.505    |

**Table S17.** Fitting coefficients for Ge-like Sb<sup>19+</sup> ion.

| Lower level | Upper level | b <sub>0</sub> | b <sub>1</sub> | b <sub>2</sub> | b <sub>3</sub> | b <sub>5</sub> | c <sub>0</sub> | c <sub>1</sub> | c <sub>2</sub> | d <sub>0</sub> | d <sub>1</sub> |
|-------------|-------------|----------------|----------------|----------------|----------------|----------------|----------------|----------------|----------------|----------------|----------------|
| 1           | 7           | 4.431E+26      | 8.871E+23      | 5.131E+19      |                |                | 2.303E+43      | 4.117E+41      | 4.037E+38      | -1.973E-15     | 5.210E-16      |
| 1           | 11          | -5.803E+28     | -9.800E+26     |                |                |                | -2.136E+46     | -1.268E+45     | -4.407E+42     | -2.557E-16     | 6.374E-17      |
| 1           | 13          | 8.507E+28      | 7.092E+27      |                |                |                | -4.695E+45     | 1.780E+45      | 8.178E+42      | -1.110E-15     | 2.681E-16      |
| 1           | 17          | 5.089E+2       | 3.339          | 1.320E-3       | -2.603E-7      |                | 1.612E+20      | 2.704E+18      | 8.667E+15      | -6.950E-16     | 1.608E-16      |
| 1           | 19          | -6.257E+26     | -2.901E+27     | -1.633E+24     | 3.448E+20      |                | 1.601E+44      | -1.107E+44     | -9.307E+41     | -6.832E-15     | 1.557E-15      |
| 1           | 23          | -1.585E+24     | -1.335E+22     | -5.897E+18     | 1.155E+15      |                | -1.185E+43     | -2.047E+41     | -7.317E+38     | -3.492E-17     | 8.005E-18      |
| 1           | 27          | -2.646E+25     | -1.320E+24     | -3.620E+20     |                |                | -2.753E+44     | -2.240E+43     | -1.129E+41     | -2.223E-17     | 5.018E-18      |
| 2           | 6           | 1.110E+18      | 2.296E+15      | 1.249E+11      |                |                | 3.624E+15      | 9.466E+13      | 1.037E+11      | -1.600E+4      | 4.823E+3       |
| 2           | 7           | 2.947E+4       | 3.119E+1       |                |                |                | 3.734E+3       | 7.392E+1       | 3.050E-1       | 1.019E+2       | 6.559          |
| 2           | 8           | 1.578E+7       | 3.167E+4       | 1.795          |                |                | 1.877E+4       | 3.809E+2       | 3.861E-1       | -6.840E+4      | 1.887E+4       |
| 2           | 10          | 1.052E+7       | 2.109E+4       | 1.224          |                |                | 4.518E+4       | 7.925E+2       | 7.744E-1       | -2.476E+4      | 6.495E+3       |
| 2           | 11          | 1.442E+7       | 2.855E+4       | 1.649          |                |                | 2.179E+4       | 3.724E+2       | 3.578E-1       | -7.326E+4      | 1.907E+4       |

|   |    |             |            |            |            |           |            |            |            |            |            |
|---|----|-------------|------------|------------|------------|-----------|------------|------------|------------|------------|------------|
| 2 | 12 | 4.788E+4    | -9.101     |            |            |           | 4.146E+3   |            |            | -6.214E+2  | 1.864E+2   |
| 2 | 13 | 2.673E+7    | 5.138E+4   | 2.960      |            |           | 4.215E+4   | 6.353E+2   | 5.766E-1   | -8.691E+4  | 2.179E+4   |
| 2 | 14 | -2.828E+21  | -1.232E+18 | 1.993E+14  |            |           | -1.196E+40 | -1.690E+38 | -4.206E+33 | -2.583E-17 | 6.694E-18  |
| 2 | 15 | -2.091E+23  | -5.734E+20 | -1.061E+17 | 1.819E+13  |           | -2.219E+41 | -3.319E+39 | -5.083E+36 | -1.291E-16 | 3.303E-17  |
| 2 | 17 | -5.656E+25  | -1.058E+23 | -5.987E+18 |            |           | -2.253E+43 | -2.898E+41 | -2.450E+38 | -4.542E-16 | 1.087E-16  |
| 2 | 18 | -1.509E+17  | -2.843E+14 | -1.447E+10 |            |           | -1.224E+34 | -1.510E+32 | -1.231E+29 | -2.467E-15 | 5.800E-16  |
| 2 | 19 | 6.355E+1    | 3.458E-1   | 1.272E-4   | -2.508E-8  |           | 2.297E+19  | 3.722E+17  | 1.061E+15  | -5.529E-16 | 1.298E-16  |
| 2 | 21 | 1.679E+27   | -2.005E+26 | -5.939E+22 |            |           | 3.183E+44  | -2.591E+43 | -1.935E+41 | -1.985E-15 | 4.551E-16  |
| 2 | 22 | 1.423E-1    | 9.878E-4   | 4.032E-7   | -7.987E-11 |           | 5.103E+16  | 8.540E+14  | 2.800E+12  | -6.604E-16 | 1.510E-16  |
| 2 | 23 | 4.059E+8    | 7.265E+5   | 3.377E+1   |            |           | 7.146E+25  | 7.761E+23  | 5.788E+20  | -1.391E-15 | 3.171E-16  |
| 2 | 25 | -1.655E+4   | -2.870E+1  | -1.250E-3  |            |           | -8.099E+21 | -8.640E+19 | -6.209E+16 | -5.082E-16 | 1.155E-16  |
| 2 | 27 | -1.990E+24  | -1.765E+22 | -8.107E+18 | 1.588E+15  |           | -1.146E+43 | -2.049E+41 | -8.003E+38 | -4.263E-17 | 9.826E-18  |
| 3 | 6  | 1.440E+28   | 5.712E+26  | 1.095E+23  |            |           | 3.543E+45  | 7.827E+44  | 7.705E+42  | -7.165E-17 | 2.217E-17  |
| 3 | 7  | 5.87889E+23 | 1.158E+21  | 6.300E+16  |            |           | 5.586E+41  | 1.240E+40  | 1.264E+37  | -7.187E-17 | 2.051E-17  |
| 3 | 8  | -4.693E+25  | -4.876E+21 | 4.324E+18  |            |           | -1.864E+44 | -3.769E+42 | 7.585E+38  | -1.363E-17 | 4.085E-18  |
| 3 | 9  | -1.295E-1   | -1.757E-4  |            |            |           | -3.429E+16 | -6.546E+14 | -3.926E+11 | -3.072E-16 | 8.479E-17  |
| 3 | 11 | -4.955E+25  | -7.340E+22 | -2.883E+18 |            |           | -1.637E+44 | -2.860E+42 | -2.077E+39 | -2.874E-17 | 7.679E-18  |
| 3 | 12 | -4.420E+27  | -1.138E+27 | -5.719E+23 | 1.280E+20  |           | -1.366E+44 | -1.504E+44 | -1.908E+42 | -9.313E-16 | 2.445E-16  |
| 3 | 13 | 4.887E+28   | 3.907E+27  |            |            |           | -2.446E+45 | 5.869E+44  | 2.997E+42  | -1.522E-15 | 3.853E-16  |
| 3 | 14 | -1.199E+26  | 2.545E+26  | 4.912E+22  |            |           | -7.219E+45 | 1.264E+45  | 1.369E+43  | -2.228E-17 | 6.129E-18  |
| 3 | 15 | 9.044E+14   | 4.935E+12  | 1.731E+9   | -3.430E+5  |           | 3.920E+32  | 7.178E+30  | 2.177E+28  | -3.442E-16 | 8.484E-17  |
| 3 | 16 | -1.402E+11  | -2.024E+8  |            |            |           | -4.310E+28 | -5.543E+26 | -3.127E+23 | -5.524E-16 | 1.334E-16  |
| 3 | 17 | -7.456E+3   | -2.058E+1  | -2.150E-3  |            |           | -3.424E+23 | -5.404E+21 | -1.916E+19 | -1.385E-19 | 1.890E-19  |
| 3 | 18 | 3.703E+7    | 6.852E+4   | 3.600      |            |           | 6.917E+4   | 8.786E+2   | 7.225E-1   | -9.930E+4  | 2.365E+4   |
| 3 | 19 | 1.291E+5    | 1.358E+2   |            |            |           | 6.329E+3   | 7.818E+1   | 3.627E-2   | -2.712E+3  | 7.034E+2   |
| 3 | 21 | 2.567E+7    | 4.671E+4   | 2.408      |            |           | 4.925E+4   | 5.643E+2   | 4.419E-1   | -1.158E+5  | 2.680E+4   |
| 3 | 23 | 4.695E+6    | 8.292E+3   | 3.910E-1   |            |           | 4.059E+4   | 4.537E+2   | 3.401E-1   | -2.655E+4  | 6.115E+3   |
| 3 | 24 | -2.416E+7   | 1.066E+5   | 8.651E+1   | -1.965E-2  |           | -1.581E+4  | -7.143E+1  | 7.718E-1   | -3.639E+5  | 8.342E+4   |
| 3 | 25 | -1.146E+8   | 7.084E+5   | 6.034E+2   | -1.817E-1  | 1.245E-8  | -7.692E+5  | -2.133E+3  | 5.147E+1   | -3.524E+4  | 8.094E+3   |
| 3 | 26 | -2.441E+8   | 1.297E+6   | 1.262E+3   | -4.234E-1  | 3.735E-8  | -1.033E+6  | -3.225E+3  | 5.833E+1   | -5.751E+4  | 1.341E+4   |
| 3 | 27 | -2.967E-14  | 2.782E-16  | 8.916E-20  | -3.308E-23 | 3.720E-30 | -5.648E+5  | -3.430E+2  | 5.619E+1   | -1.253E-18 | -1.253E-18 |
| 4 | 6  | -2.330E+27  | -1.971E+25 | -3.121E+21 |            |           | -7.171E+45 | -4.171E+44 | -2.026E+42 | -7.003E-18 | 2.494E-18  |
| 4 | 7  | 8.487E+26   | 9.796E+25  | 2.322E+22  |            |           | -6.077E+44 | 2.773E+44  | 3.833E+42  | -2.537E-17 | 7.945E-18  |
| 4 | 8  | -6.638E-2   | -1.230E-3  | -4.336E-7  | 9.041E-11  |           | -1.388E+17 | -6.494E+15 | -6.584E+13 | -1.839E-17 | 5.895E-18  |
| 4 | 9  | -2.284E+24  | -9.755E+21 | -2.525E+18 | 5.178E+14  |           | -3.633E+41 | -1.021E+40 | -2.722E+37 | -3.497E-16 | 1.038E-16  |

|   |    |            |            |            |            |  |            |            |            |            |           |
|---|----|------------|------------|------------|------------|--|------------|------------|------------|------------|-----------|
| 4 | 11 | 1.928E+28  | -1.658E+27 |            |            |  | -9.040E+46 | -7.025E+45 | -8.285E+44 | -9.575E-19 | 4.157E-19 |
| 4 | 12 | -1.450E+9  | 7.980E+6   | 4.759E+3   | -1.17      |  | -1.528E+27 | -2.068E+25 | 1.800E+23  | -6.399E-17 | 1.837E-17 |
| 4 | 13 | 3.012E+7   | 1.581E+5   | 5.025E+1   | -1.017E-2  |  | 6.557E+25  | 1.486E+24  | 4.715E+21  | -4.137E-17 | 1.118E-17 |
| 4 | 14 | 1.090E+24  | 1.583E+21  |            |            |  | 1.343E+41  | 2.350E+39  | 1.462E+36  | -7.914E-16 | 2.112E-16 |
| 4 | 15 | 1.658      | 8.790E-3   | 2.895E-6   | -5.802E-10 |  | 8.379E+17  | 1.730E+16  | 5.328E+13  | -2.221E-16 | 5.762E-17 |
| 4 | 16 | 6.311E+25  | -2.114E+25 | -4.552E+21 | 5.233E+17  |  | -9.744E+43 | -1.598E+44 | -3.229E+42 | -5.977E-18 | 1.913E-18 |
| 4 | 17 | 4.364E+10  | 2.375E+8   | 8.032E+4   | -1.601E+1  |  | 4.425E+27  | 8.650E+25  | 2.640E+23  | -1.286E-15 | 3.248E-16 |
| 4 | 18 | 4.867E+25  | 4.867E+25  | 9.919E+19  | -1.970E+16 |  | 4.781E+43  | 9.221E+41  | 2.948E+39  | -1.427E-16 | 3.562E-17 |
| 4 | 19 | -1.235E+26 | -2.373E+23 | -1.369E+19 |            |  | -1.174E+44 | -1.700E+42 | -1.525E+39 | -1.550E-16 | 3.840E-17 |
| 4 | 21 | 5.586E+24  | 3.066E+22  | 1.063E+19  | -2.083E+15 |  | 2.007E+42  | 3.482E+40  | 1.036E+38  | -4.584E-16 | 1.116E-16 |
| 4 | 23 | 4.217E+25  | 7.762E+22  | 3.951E+18  |            |  | 1.949E+43  | 2.494E+41  | 2.027E+38  | -3.987E-16 | 9.497E-17 |
| 4 | 24 | -6.644E+26 | -1.165E+24 | -5.240E+19 |            |  | -1.894E+44 | -2.412E+42 | -1.865E+39 | -6.328E-16 | 1.514E-16 |
| 4 | 25 | -2.432E+27 | -1.199E+25 | -4.115E+21 | 8.037E+17  |  | -2.117E+44 | -3.391E+42 | -8.874E+39 | -2.195E-15 | 5.194E-16 |
| 4 | 26 | -2.434E+10 | -4.474E+7  | -2.098E+3  |            |  | -1.297E+27 | -1.513E+25 | -1.174E+22 | -4.121E-15 | 9.546E-16 |
| 4 | 27 | 9.559E+24  | 7.625E+21  | -1.851E+18 | 5.665E+14  |  | 6.290E+43  | 7.230E+41  | 1.991E+38  | -1.250E-17 | 4.110E-18 |
| 5 | 7  | -7.276E+6  | 3.894E+4   | 2.880E+1   | -8.360E-3  |  | -1.054E+25 | -2.600E+23 | 1.932E+21  | -2.369E-17 | 7.895E-18 |
| 5 | 11 | -4.730E+1  | -1.990E-1  | -5.247E-5  | 1.070E-8   |  | -1.223E+19 | -3.402E+17 | -9.190E+14 | -2.120E-16 | 6.311E-17 |
| 5 | 13 | 3.724E+4   | 1.884E+2   | 5.698E-2   | -1.167E-5  |  | 6.072E+21  | 1.496E+20  | 4.582E+17  | -4.724E-16 | 1.314E-16 |
| 5 | 17 | -2.434E+8  | -4.816E+5  | -2.843E+1  |            |  | -1.780E+25 | -3.010E+23 | -2.900E+20 | -1.533E-15 | 3.986E-16 |

**Table S18.** Fitting coefficients for Ge-like Sn<sup>18+</sup> ion.

| Lower l | Upper level | b <sub>0</sub> | b <sub>1</sub> | b <sub>2</sub> | b <sub>3</sub> | c <sub>0</sub> | c <sub>1</sub> | c <sub>2</sub> | d <sub>0</sub> | d <sub>1</sub> |
|---------|-------------|----------------|----------------|----------------|----------------|----------------|----------------|----------------|----------------|----------------|
| 2       | 6           | 2.328          | 1.018E-1       |                |                | 2.211E+1       | 1.600E+1       | 3.261E-1       | 2.820E-3       | 5.750E-2       |
| 3       | 6           | 1.181E+1       | 4.950E-1       |                |                | 2.145E+2       | 1.654E+2       | 3.303          | 3.810E-3       | 2.708E-2       |
| 4       | 6           | 2.794          | 1.246E-1       |                |                | 2.638E+2       | 2.842E+2       | 6.437          | 1.850E-3       | 3.330E-3       |
| 1       | 7           | 4.869E+1       | 2.107          |                |                | 6.473E+1       | 3.201E+1       | 5.858E-1       | -3.020E-1      | 7.080E-1       |
| 2       | 7           | 1.336E-1       | -1.180E-3      |                |                | 4.889E+1       | 2.673E+1       | 2.614          | 1.740E-3       | -3.219E-4      |
| 3       | 7           | 8.769E+1       | 4.781          | 6.330E-3       |                | 2.488E+3       | 1.576E+3       | 4.375E+1       | -3.610E-3      | 2.394E-2       |
| 4       | 7           | 1.437          | 6.442E-2       |                |                | 6.261E+1       | 4.932E+1       | 1.045          | 1.630E-3       | 1.123E-2       |
| 5       | 7           | -2.117E+4      | 3.086E+3       | 6.407E+1       | -5.139E-1      | -7.832E+5      | -5.407E+5      | 1.092E5+       | 3.830E-3       | 1.105E-2       |
| 2       | 8           | 2.275E+1       | 9.880E-1       |                |                | 6.494E+1       | 3.640E+1       | 6.914E-1       | -7.365E-2      | 2.750E-1       |

|   |    |            |            |            |           |            |            |            |           |          |
|---|----|------------|------------|------------|-----------|------------|------------|------------|-----------|----------|
| 3 | 8  | 1.057      | 1.643E-2   |            |           | 1.070E+2   | 6.488E+1   | 4.238E-1   | 1.044E-4  | 5.410E-3 |
| 4 | 8  | 7.629E+38  | 1.650E+37  | -1.238E+34 |           | 4.576E+40  | 3.447E+40  | 3.225E+38  | 1.750E-3  | 7.300E-3 |
| 3 | 9  | 2.768      | 1.101E-1   |            |           | 1.733E+1   | 9.576      | 1.684E-1   | -3.293E-2 | 1.240E-1 |
| 4 | 9  | -3.159E+3  | 5.6004E+2  | 5.794      |           | -1.435E+4  | -5.400E+3  | 1.512E+3   | -2.090E-3 | 1.393E-1 |
| 2 | 10 | 1.046      |            |            |           | 1.207E+1   | 4.370      | -2.848E-2  | -4.168E-2 | 9.096E-2 |
| 1 | 11 | -1.776E+4  | 2.538E+3   | 5.592E+1   | -3.901E-1 | -2.377E+5  | -5.091E+4  | 1.442E+4   | -5.976E-2 | 9.219E-2 |
| 2 | 11 | 6.615      | 2.838E-1   |            |           | 2.576E+1   | 1.213E+1   | 2.176E-1   | -1.252E-1 | 2.585E-2 |
| 3 | 11 | 1.443E+6   | 5.154E+4   |            |           | 1.117E+8   | 5.514E+7   | 8.537E+5   | -4.500E-3 | 1.143E-2 |
| 4 | 11 | 6.682E-2   | 2.590E-3   |            |           | 4.799E+1   | 2.723E+1   | 3.541      | 6.656E-4  | 8.066E-5 |
| 5 | 11 | 4.693      | 1.945E-1   |            |           | 3.390E+1   | 2.331E+1   | 4.487E-1   | -1.569E-4 | 7.981E-2 |
| 2 | 12 | -6.733E+40 | -2.291E+39 | -4.052E+37 | 2.610E+35 | -2.084E+43 | -1.072E+43 | -6.119E+41 | 4.759E-4  | 1.400E-3 |
| 3 | 12 | 2.982E+1   | 1.271      |            |           | 8.537E+1   | 4.114E+1   | 7.390E-1   | -1.538E-1 | 3.393E-1 |
| 4 | 12 | 2.380      | 7.463E-2   |            |           | 8.041E+1   | 4.759E+1   | 6.908E-1   | -2.210E-3 | 1.925E-2 |
| 1 | 13 | 8.277      | 3.430E-1   |            |           | 3.091E+1   | 1.127E+1   | 1.821E-1   | -3.067E-1 | 3.877E-1 |
| 2 | 13 | 7.219      | 3.013E-1   |            |           | 2.806E+1   | 1.152E+1   | 1.942E-1   | -2.026E-1 | 3.134E-1 |
| 3 | 13 | 4.857E+1   | 2.073      |            |           | 1.029E+2   | 4.379E+1   | 7.597E-1   | -3.351E-1 | 5.504E-1 |
| 4 | 13 | 4.499E+3   | 1.796E+2   |            |           | 3.207E+5   | 1.622E+5   | 2.815E+3   | -4.420E-3 | 1.229E-2 |
| 5 | 13 | 4.912E+1   | 2.155      |            |           | 2.077E+2   | 1.173E+2   | 2.255      | -4.698E-2 | 1.839E-1 |
| 2 | 15 | 2.881      | 6.787E-2   |            |           | 2.695E+2   | 1.135E+2   | 1.097      | -5.800E-3 | 1.068E-2 |
| 3 | 15 | 4.530E+9   | 1.489E+8   |            |           | 2.574E+11  | 1.104E+11  | 1.575E+9   | -8.410E-3 | 1.789E-2 |
| 4 | 15 | 3.165E+1   | 1.343      |            |           | 8.774E+1   | 4.398E+1   | 7.964E-1   | -1.316E-1 | 3.297E-1 |
| 2 | 14 | 5.174E+1   | 2.679      | 3.550E-3   |           | 1.538E+3   | 6.101E+2   | 1.522E+1   | -2.347E-2 | 4.136E-2 |
| 3 | 14 | -1.539E+1  | 2.782      | 5.467E-2   | -3.522E-4 | -1.945E+2  | -2.943E+1  | 1.346E+1   | -7.624E-2 | 1.057E-1 |
| 4 | 14 | 1.641E+5   | 1.939E+4   | 1.590E+2   | -8.862E-1 | 2.629E+6   | 1.430E+6   | 9.866E+4   | -3.488E-2 | 6.550E-2 |
| 2 | 19 | 1.513E+3   | 6.234E+1   |            |           | 1.329E+4   | 4.677E+3   | 7.441E+1   | -1.440E-1 | 1.733E-1 |
| 4 | 19 | 5.075E+1   | 2.146      |            |           | 1.247E+2   | 5.249E+1   | 9.011E-1   | -2.980E-1 | 4.806E-1 |
| 1 | 19 | 3.021E+6   | 1.253E+5   |            |           | 3.221E+7   | 1.019E+7   | 1.574E+5   | -1.621E-1 | 1.680E-1 |
| 5 | 19 | 4.537E+1   | 1.924      |            |           | 8.077E+1   | 3.731E+1   | 6.603E-1   | -2.880E-1 | 5.779E-1 |
| 3 | 19 | 4.342E-2   | 5.130E-3   |            |           | 5.570E+1   | 2.490E+1   | 4.018      | 6.123E-4  | 1.837E-4 |
| 3 | 17 | 4.854E+2   | 2.022E+1   |            |           | 4.181E+3   | 1.531E+3   | 2.473E+1   | -1.362E-1 | 1.687E-1 |
| 4 | 17 | 1.845      | -1.548E-2  |            |           | 4.456E+2   | 2.138E+2   | -2.106     | 7.870E-4  | 2.130E-3 |
| 2 | 21 | 8.667E+2   | 3.698E+1   |            |           | 1.817E+3   | 6.056E+2   | 9.666      | -7.460E-1 | 8.065E-1 |
| 3 | 21 | 6.536E+1   | 2.718      |            |           | 3.039E+2   | 1.045E+2   | 1.661      | -2.960E-1 | 3.408E-1 |
| 4 | 21 | 8.329E+34  | 3.479E+33  |            |           | 1.987E+36  | 7.845E+35  | 1.312E+34  | -3.704E-2 | 5.389E-2 |
| 1 | 16 | 1.022E+1   | 4.257E-1   |            |           | 8.902      | 2.634      | 3.981E-2   | -2.400    | 2.284    |

|   |    |            |            |           |            |            |            |            |           |          |
|---|----|------------|------------|-----------|------------|------------|------------|------------|-----------|----------|
| 2 | 16 | 7.727E+5   | 3.182E+4   |           |            | 8.279E+6   | 2.721E+6   | 4.200E+4   | -1.480E-1 | 1.587E-1 |
| 3 | 16 | 2.601      | 8.147E-2   |           |            | 2.993E+2   | 1.050E+2   | 1.430      | -6.470E-3 | 1.095E-2 |
| 4 | 16 | 8.946E+1   | 4.714      | 6.300E-3  |            | 2.986E+3   | 1.204E+3   | 2.863E+1   | -2.846E-2 | 3.957E-2 |
| 5 | 16 | -1.074E+41 | -1.019E+39 | 5.524E+36 |            | -7.098E+43 | -2.974E+43 | 1.875E+40  | -4.231E-4 | 1.330E-3 |
| 2 | 18 | 1.950E+2   | 8.140      |           |            | 5.832E+2   | 1.763E+2   | 2.685      | -6.638E-1 | 6.455E-1 |
| 3 | 18 | 4.223E+1   | 1.732      |           |            | 2.159E+2   | 6.720E+1   | 1.021      | -3.516E-1 | 3.577E-1 |
| 4 | 18 | 1.267E+2   | 5.148      |           |            | 9.900E+2   | 3.525E+2   | 5.633      | -1.490E-1 | 1.880E-1 |
| 2 | 22 | 4.676E+3   | 1.943E+2   |           |            | 4.245E+4   | 1.271E+4   | 1.924E+2   | -2.229E-1 | 2.151E-1 |
| 3 | 23 | 8.867      | 3.725E-1   |           |            | 1.427E+1   | 4.333      | 6.636E-2   | -1.229    | 1.196    |
| 4 | 23 | 1.612E+1   | 6.638E-1   |           |            | 1.119E+2   | 3.882E+1   | 6.139E-1   | -1.927E-1 | 2.245E-1 |
| 1 | 23 | 2.704E+42  | 1.359E+41  | 1.734E+38 |            | 3.900E+44  | 1.110E+44  | 2.243E+42  | -1.569E-2 | 1.495E-2 |
| 2 | 23 | 1.035E+2   | 4.303      | 6.118E+1  | -3.346E-1  | 4.458E+2   | 1.319E+2   | 1.990      | -4.853E-1 | 4.617E-1 |
| 3 | 26 | 3.579E+4   | 5.761E+3   |           |            | 7.391E+5   | 3.270E+5   | 2.630E+4   | -9.070E-2 | 8.996E-2 |
| 4 | 26 | 6.955E+6   | 3.590E+5   | 4.485E+2  |            | 8.762E+7   | 3.161E+7   | 7.015E+5   | -1.085E-1 | 1.247E-1 |
| 5 | 26 | 7.270E+36  | 1.466E+35  | 4.960E+33 | -3.386E+31 | 2.085E+39  | 9.226E+38  | 4.279E+37  | -1.876E-4 | 1.910E-3 |
| 2 | 25 | -2.470E+6  | 4.249E+5   | 8.536E+3  | -5.020E+1  | -2.690E+7  | -1.762E+6  | 1.302E+6   | -1.994E-1 | 1.877E-1 |
| 3 | 25 | 1.325E+34  |            |           |            | 1.981E+35  | 4.225E+34  | -2.759E+32 | -1.393E-1 | 1.361E-1 |
| 4 | 25 | 2.154E+2   | 9.126      |           |            | 5.006E+2   | 1.699E+2   | 2.715      | -6.325E-1 | 7.045E-1 |
| 3 | 24 | 1.117E+5   | 4.604E+3   |           |            | 1.136E+6   | 3.202E+5   | 4.736E+3   | -2.002E-1 | 2.012E-1 |
| 4 | 24 | 8.480      | 3.613E-1   |           |            | 1.154E+1   | 3.641      | 5.699E-2   | -1.337    | 1.348    |
| 1 | 27 | -1.116E+5  | 2.031E+4   | 4.059E+2  | -2.334     | -3.477E+7  | -7.759E+5  | 1.541E+6   | -8.010E-3 | 7.520E-3 |
| 2 | 27 | -1.081     | 6.504E-1   | 1.119E-2  | -6.420E-5  | -1.660E+2  | 6.245E+1   | 2.474E+1   | -1.434E-2 | 1.373E-2 |
| 3 | 27 | 4.337E+42  |            |           |            | 2.080E+45  | 5.669E+44  | -2.015E+42 | 2.960E-3  | 1.400E-3 |
| 4 | 27 | 3.129E+41  | 1.873E+40  | 2.912E+37 |            | 5.070E+43  | 1.870E+43  | 6.752E+41  | 1.090E-3  | 5.990E-3 |
| 5 | 27 | 1.480E+1   | 6.325E-1   |           |            | 8.675      | 2.885      | 4.614E-2   | -2.671    | 2.889    |

**Table S19.** Fitting coefficients for Ge-like In<sup>17+</sup> ion.

| Lower level | Upper level | b <sub>0</sub> | b <sub>1</sub> | b <sub>2</sub> | b <sub>3</sub> | b <sub>5</sub> | c <sub>0</sub> | c <sub>1</sub> | c <sub>2</sub> | d <sub>0</sub> | d <sub>1</sub> |
|-------------|-------------|----------------|----------------|----------------|----------------|----------------|----------------|----------------|----------------|----------------|----------------|
| 1           | 7           | -5.757E+28     | -3.449E+27     |                |                |                | 1.081E+45      | -3.033E+44     | -1.735         | -2.321E-15     | 5.892E-16      |
| 1           | 11          | -4.362E+25     | 8.456E+23      | 5.418E+20      | -1.290E+17     |                | -1.833E+43     | 1.171E+41      | 4.992E+39      | -2.930E-16     | 7.648E-17      |
| 1           | 14          | 7.220E+26      | 2.746E+24      | 7.426E+20      | -1.429E+17     |                | 8.259E+43      | 1.396E+42      | 2.847E+39      | -1.298E-15     | 3.219E-16      |
| 1           | 16          | -1.725E-12     | 8.683E-15      | 1.002E-17      | -3.836E-21     | 4.060E-28      | -6.946E+5      | -3.962E+3      | 4.814E+1       | -4.710E-16     | 1.128E-16      |
| 1           | 19          | 1.221E+29      | -2.630E27      | -9.195E+23     |                |                | 3.725E+45      | -5.207E+43     | -6.367E+41     | -8.239E-15     | 1.905E-15      |
| 1           | 23          | -2.463E+24     | -2.509E+22     | -1.195E+19     | 2.451E+15      |                | -8.456E+42     | -1.725E+41     | -6.937E+38     | -6.951E-17     | 1.608E-17      |

|   |    |            |             |            |            |  |            |            |            |             |            |
|---|----|------------|-------------|------------|------------|--|------------|------------|------------|-------------|------------|
| 1 | 27 | -2.230E+23 | -2.102E+23  | -1.228E+20 | 2.537E+16  |  | 1.742E+42  | -2.100E+42 | -1.604E+40 | -2.909E-17  | 6.621E-18  |
| 2 | 6  | 4.593      | -8.930E-3   | -8.190E-6  | 2.237E-9   |  | 1.678E+18  | 3.890E+16  | -1.108E+14 | -1.4611E-16 | 4.162E-17  |
| 2 | 8  | 1.929E+26  | 2.344E+23   | -2.987E+19 |            |  | 1.705E+43  | 3.586E+41  | 1.304E+38  | -9.991E-16  | 2.534E-16  |
| 2 | 10 | -1.205E+25 | -1.966E+22  | 5.16879E17 |            |  | -4.125E+42 | -7.720E+40 | -5.008E+37 | -2.960E-16  | 7.634E-17  |
| 2 | 11 | 7.1313E+15 | -6.219E+13  | -4.744E+10 | 1.315E+7   |  | 9.327E+32  | 6.659E+30  | -1.451E+29 | -8.154E-16  | 2.091E-16  |
| 2 | 12 | 1.569E+25  | -7.801E+21  | 2.200E+19  | -8.820E+15 |  | 2.175E+44  | 4.222E+42  | 5.072E+39  | -3.036E-18  | 6.948E-19  |
| 2 | 13 | -3.597E+25 | -3.1506E+22 |            |            |  | -1.008E+44 | -1.658E+42 | -5.770E+38 | -3.351E-17  | 8.981E-18  |
| 2 | 14 | 7.967E+28  | -8.216E+27  | -1.051E+25 | 3.556E+21  |  | -2.150E+45 | -5.176E+44 | -1.828E+43 | -1.017E-15  | 2.597E-16  |
| 2 | 15 | -1.866E+6  | -2.598E+3   | 4.067E-1   | -1.497E-4  |  | -1.958E+24 | -2.863E+22 | -1.361E+19 | -1.086E-16  | 2.936E-17  |
| 2 | 16 | 2.238E+2   | -3.146      | -2.150E-3  | 5.048E-7   |  | 5.957E+19  | -1.750E+17 | -1.032E+16 | -6.119E-16  | 1.508E-16  |
| 2 | 18 | -8.924E+28 | -2.135E+27  | -9.337E+23 | 1.637E+20  |  | -5.509E+45 | -2.387E+44 | -1.439E+42 | -2.647E-15  | 6.373E-16  |
| 2 | 19 | 4.330E+28  | 2.187E+27   |            |            |  | -5.725E+44 | 1.538E+45  | 5.723E+42  | -4.757E-16  | 1.139E-16  |
| 2 | 21 | 1.932E+27  | 4.083E+24   | 2.244E+20  |            |  | 1.850E+44  | 2.279E+42  | 1.987E+39  | -2.258E-15  | 5.262E-16  |
| 2 | 22 | 1.937E-1   | 1.230E-3    | 4.880E-7   | -9.825E-11 |  | 5.520E+16  | 9.460E+14  | 2.869E+12  | -7.603E-16  | 1.767E-16  |
| 2 | 23 | -6.163E-2  | -1.012E-4   |            |            |  | -8.306E+15 | -9.493E+13 | -5.603E+10 | -1.677E-15  | 3.879E-16  |
| 2 | 25 | -4.032E+27 | -7.048E+26  | -1.997E+23 |            |  | 1.274E+44  | -2.674E+44 | -1.716E+42 | -7.643E-16  | 1.759E-16  |
| 2 | 27 | -5.958E+24 | -7.976E+22  | -4.143E+19 | 8.504E+15  |  | -2.899E+43 | -6.958E+41 | -3.423E+39 | -4.689E-17  | 1.084E-17  |
| 3 | 6  | 8.649E+26  | 1.787E+26   | 8.598E+22  | -2.273E+19 |  | 3.175E+43  | 1.533E+44  | 3.174E+42  | -6.358E-17  | 1.953E-17  |
| 3 | 7  | 5.466E+8   | 1.003E+6    | 3.866      | 1.324E-2   |  | 6.053E+26  | 1.455E+25  | 1.272E+22  | -5.172E-17  | 1.557E-17  |
| 3 | 8  | 8.358E-1   | -5.190E-3   | -1.620E-6  | 2.142E-10  |  | 2.853E+18  | 4.887E+16  | -4.386E+14 | -1.174E-17  | 3.837E-18  |
| 3 | 9  | 3.046E+5   | -5.1855E+3  | -3.503     | 1.080E-3   |  | 5.967E+22  | 1.056E+20  | -2.049E+19 | -4.744E-16  | 1.1790E-16 |
| 3 | 11 | -1.566E+5  | -2.657E+2   |            |            |  | -3.593E+23 | -7.137E+21 | -5.529E+18 | -4.280E-17  | 1.070E-17  |
| 3 | 12 | -1.205E+23 | -1.783E+20  | 9.540E+15  |            |  | -1.120E+40 | -2.075E+38 | -1.135E+35 | -1.114E-15  | 2.836E-16  |
| 3 | 13 | 1.885E+3   | 9.255E+1    | 5.117E-2   | -1.392E-5  |  | 2.129E+21  | 1.535E+20  | 1.693E+18  | -9.548E-17  | 2.374E-17  |
| 3 | 14 | -2.441E+28 | -4.083E+27  | -2.169E+24 | 4.923E+20  |  | -6.258E+44 | -3.337E+44 | -3.805E+42 | -1.744E-15  | 4.517E-16  |
| 3 | 15 | 8.591E+24  | 1.741E+22   | 9.195E+17  | 7.587E+13  |  | 3.922E+42  | 6.091E+40  | 5.619E+37  | -2.890E-16  | 7.382E-17  |
| 3 | 16 | -3.205E+25 | 2.939E+24   | 1.673E+20  |            |  | -3.793E+44 | 4.799E+43  | 1.384E+42  | -3.029E-18  | 7.155E-19  |
| 3 | 17 | -2.499E+9  | -3.852E+6   |            |            |  | -7.783E+26 | -1.086E+25 | -6.339E+21 | -4.766E-16  | 1.195E-16  |
| 3 | 18 | 1.789E+20  | 4.108E+17   | 3.189E+13  |            |  | 2.627E+37  | 3.707E+35  | 3.817E+32  | -1.142E-15  | 2.796E-16  |
| 3 | 19 | -1.372E-1  | -2.238E-4   | -1.209E-8  |            |  | -4.768E+17 | -6.660E+15 | -5.366E+12 | -3.657E-17  | 9.547E-18  |
| 3 | 21 | 1.083E+27  | -2.043E+26  | -1.212E+23 | 2.644E+19  |  | 2.755E+44  | -3.690E+43 | -3.671E+41 | -1.144E-15  | 2.704E-16  |
| 3 | 23 | 6.966E+25  | 3.746E+23   | 1.356E+20  | -2.664E+16 |  | 4.439E+43  | 7.209E+41  | 1.934E+39  | -3.249E-16  | 7.615E-17  |
| 3 | 24 | -2.656E+8  | -5.726E+5   | -3.284E+1  |            |  | -1.351E+25 | -1.676E+23 | -1.494E+20 | -4.248E-15  | 9.897E-16  |
| 3 | 25 | -1.021E+26 | -5.823E+23  | -2.203E+20 | 4.458E+16  |  | -3.889E+43 | -6.379E+41 | -1.786E+39 | -5.626E-16  | 1.309E-16  |
| 3 | 26 | -3.371E+26 | -3.381E+24  | -1.642E+21 | 3.576E+17  |  | -1.045E+44 | -2.139E+42 | -8.697E+39 | -7.881E-16  | 1.785E-16  |

|   |    |             |            |            |            |  |            |            |            |             |            |
|---|----|-------------|------------|------------|------------|--|------------|------------|------------|-------------|------------|
| 3 | 27 | -6.276E+25  | -3.475E+25 | -6.458E+21 | 9.669E+17  |  | -3.560E+43 | -5.612E+44 | -5.705E+42 | -7.303E-19  | 1.052E-18  |
| 4 | 6  | -1.818E+10  | -7.026E+7  | -1.727E+4  | 4.567      |  | -5.791E+28 | -2.574E+27 | -6.828E+24 | -7.467E-18  | 2.600E-18  |
| 4 | 7  | 6.957E+18   | 1.571E+16  | 1.189E+12  | -1.306E+8  |  | 9.843E+36  | 3.032E+35  | 3.731E+32  | -2.769E-17  | 8.975E-18  |
| 4 | 8  | -1.846E+23  | 3.461E+19  | 5.351E+16  | -7.431E+12 |  | -3.945E+41 | -1.097E+40 | 6.326E+36  | -2.261E-17  | 6.075E-18  |
| 4 | 9  | 2.608E+26   | 6.236E+24  | 3.476E+21  | -1.105E+18 |  | 3.455E+43  | 1.9187E+42 | 2.057E+40  | -4.551E-16  | 1.202E-16  |
| 4 | 12 | 8.365E+25   | -1.688E+25 | -6.951E+21 | 1.412E+18  |  | 1.450E+44  | -2.283E+43 | -5.417E+41 | -3.401E-17  | 1.059E-17  |
| 4 | 13 | 9.521E+26   | 1.202E+27  | 7.083E+23  | -1.970E+20 |  | -2.071E+44 | 1.107E+44  | 1.697E+42  | -1.198E-15  | 3.060E-16  |
| 4 | 14 | 3.804E+25   | -6.083E+25 | -1.493E+22 |            |  | 1.912E+45  | -2.470E+44 | -2.900E+42 | -2.815E-17  | 7.500E-18  |
| 4 | 15 | 2.378E+24   | 6.343E+21  | 1.119E+18  | -2.171E+14 |  | 1.486E+42  | 2.741E+40  | 3.940E+37  | -1.714E-16  | 4.491E-17  |
| 4 | 16 | -1.211E+27  | -2.476E+24 | -1.081E+20 |            |  | -9.245E+43 | -1.555E+42 | -1.429E+39 | -1.559E-15  | 4.018E-16  |
| 4 | 17 | 1.840E+25   | -9.636E+22 | 1.485E+19  | -1.052E+16 |  | 1.524E+44  | 2.191E+42  | -1.514E+40 | -3.400E-18  | 1.306E-18  |
| 4 | 18 | -1.133E+27  | -1.713E+26 | -9.383E+22 | 2.108E+19  |  | -4.799E+44 | -1.461E+44 | -1.563E+42 | -1.871E-16  | 4.754E-17  |
| 4 | 19 | -3.202E+25  | -6.915E+22 | -4.461E+18 |            |  | -4.341E+43 | -6.717E+41 | -6.610E+38 | -1.0184E-16 | 2.573E-17  |
| 4 | 21 | -1.214E+26  | -3.463E+23 | -5.738E+19 | 7.369E+15  |  | -2.604E+43 | -3.971E+41 | -5.699E+38 | -7.147E-16  | 1.780E-16  |
| 4 | 23 | -4.077E+23  | -1.063E+21 | -1.444E+17 |            |  | -1.790E+41 | -2.610E+39 | -3.249E+36 | -3.794E-16  | 9.287E-17  |
| 4 | 24 | -2.284E+16  | -5.729E+13 | -6.857E+9  | 5.562E+5   |  | -4.949E+33 | -7.158E+31 | -8.494E+28 | -7.605E-16  | 1.867E-16  |
| 4 | 25 | 4.308E+17   | 1.287E+15  | 2.288E+11  | -3.067E+7  |  | 3.377E+34  | 4.975E+32  | 7.2586E+29 | -2.223E-15  | 5.399E-16  |
| 4 | 26 | 1.774E+28   | -1.688E+27 | -5.375E+23 |            |  | 1.226E+45  | -8.136E+43 | -6.696E+41 | -4.662E-15  | 1.095E-15  |
| 4 | 27 | -6.150      | -1.260E-2  | -4.148E-7  |            |  | -3.128E+19 | -4.359E+17 | -5.223E+14 | -1.525E-17  | 4.9423E-18 |
| 5 | 7  | 3.377E+21   | -4.272E+20 | -2.681E+17 | 9.390E+13  |  | 6.190E+39  | -4.551E+38 | -1.647E+37 | -3.985E-17  | 1.0566E-17 |
| 5 | 11 | -2.485E+5   | -3.908E+2  |            |            |  | -6.363E+22 | -1.686E+21 | -1.238E+18 | -1.913E-16  | 5.8263E-17 |
| 5 | 14 | -2.35223E24 | -2.888E+21 | 3.632E+17  |            |  | -3.256E+41 | -6.782E+39 | -2.508E+36 | -6.476E-16  | 1.6399E-16 |
| 5 | 16 | -6.039E+3   | -1.128E+1  |            |            |  | -3.360E+20 | -6.152E+18 | -4.919E+15 | -2.007E-15  | 5.038E-16  |
| 5 | 23 | 4.831E+25   | 1.273E+23  | 2.966E+19  |            |  | 5.438E+44  | 9.575E+42  | 4.512E+40  | -3.826E-18  | 1.0567E-18 |
| 5 | 27 | -2.577E+5   | -4.195E+2  |            |            |  | -4.888E+21 | -6.189E+19 | -3.695E+16 | -9.701E-15  | 2.3361E-15 |

**Table S20.** Fitting coefficients for Ge-like Cd<sup>16+</sup> ion.

| Lower level | Upper level | b <sub>0</sub> | b <sub>1</sub> | b <sub>2</sub> | b <sub>3</sub> | c <sub>0</sub> | c <sub>1</sub> | c <sub>2</sub> | d <sub>0</sub> | d <sub>1</sub> |
|-------------|-------------|----------------|----------------|----------------|----------------|----------------|----------------|----------------|----------------|----------------|
| 2           | 6           | 9.757E+34      | 3.500E+33      |                |                | 1.043E+36      | 8.067E+35      | 1.264E+34      | 3.403E-2       | 3.969E-2       |
| 3           | 6           | 1.289          | 4.322E-2       |                |                | 2.441E+1       | 2.017E+1       | 2.997E-1       | 2.00E-2        | 1.997E-2       |
| 4           | 6           | 1.580          | 5.149E-2       |                |                | 1.415E+2       | 1.554E+2       | 2.384          | 4.490E-3       | 2.740E-3       |
| 1           | 7           | 1.114E+1       | 4.567E-1       |                |                | 1.246E+1       | 6.691          | 1.099E-1       | 4.961E-2       | 6.923E-1       |
| 2           | 7           | 9.171E-2       | 7.200E-3       |                |                | 1.957E+1       | 1.093E+1       | 2.194          | 2.060E-3       | 4.877E-4       |
| 3           | 7           | 3.419          | 1.249E-1       |                |                | 1.178E+2       | 7.639E+1       | 1.180          | 7.420E-3       | 1.624E-2       |

|   |    |           |           |            |           |           |           |           |           |           |
|---|----|-----------|-----------|------------|-----------|-----------|-----------|-----------|-----------|-----------|
| 4 | 7  | 1.953     | 7.219E-2  |            |           | 7.238E+1  | 5.791E+1  | 9.418E-1  | 9.870E-3  | 1.102E-2  |
| 5 | 7  | 1.207     | 5.157E-2  |            |           | 3.801E+1  | 3.606E+1  | 6.950E-1  | 1.340E-2  | 1.034E-2  |
| 2 | 8  | 1.971E+2  | 7.902     |            |           | 4.228E+2  | 2.534E+2  | 4.178     | 9.397E-2  | 3.012E-1  |
| 3 | 8  | 1.233     | 6.490E-3  |            |           | 1.138E+2  | 7.847E+1  | -5.041E-2 | 3.020E-3  | 4.340E-3  |
| 4 | 8  | 1.621     | 4.674E-2  | 1.548E-4   |           | 9.430E+2  | 7.862E+1  | 1.463     | 6.210E-3  | 5.700E-3  |
| 3 | 9  | 4.034     | 3.178E-1  | 1.170E-3   |           | 1.791E+1  | 1.200E+1  | 5.318E-1  | 4.469E-2  | 1.395E-1  |
| 4 | 9  | 4.803     | 4.559E-1  | 1.79E-3    |           | 1.780E+1  | 1.477E+1  | 8.049E-1  | 8.926E-2  | 1.265E-1  |
| 2 | 10 | 2.439     | 1.009E-1  |            |           | 2.089E+1  | 1.085E+1  | 1.788E-1  | -4.085E-4 | 9.556E-2  |
| 1 | 11 | -7.264    | 1.278     | 2.660E-2   | -1.666E-4 | -6.930E+1 | -1.507E+1 | 5.540     | -2.977E-2 | 1.081E-1  |
| 2 | 11 | 9.580     | 3.943E-1  |            |           | 3.193E+1  | 1.628E+1  | 2.659E-1  | -1.025E-2 | 2.526E-1  |
| 3 | 11 | 5.324E+30 | 1.819E+29 |            |           | 2.857E+32 | 1.533E+32 | 2.114E+30 | 1.100E-3  | 1.376E-2  |
| 4 | 11 | 1.864E-2  | 1.669E-4  |            |           | 1.151E+1  | 6.687     | 8.876E-1  | 7.246E-4  | -4.299E-5 |
| 5 | 11 | 3.594     | 2.994E-1  | 1.170E-3   |           | 2.504E+1  | 2.053E+1  | 1.029     | 4.638E-2  | 6.455E-2  |
| 2 | 12 | 6.703E-2  | 1.260E-3  |            |           | 3.251E+1  | 1.629E+1  | 2.170     | 1.060E-3  | 2.091E-6  |
| 3 | 12 | 2.797E+2  | 1.138E+1  |            |           | 6.643E+2  | 3.461E+2  | 5.626     | 4.470E-3  | 3.406E-1  |
| 4 | 12 | 8.905E+10 | 8.308E+8  | -1.626E+6  |           | 4.509E+12 | 2.944E+12 | 2.580E+9  | 5.110E-3  | 8.950E-3  |
| 2 | 15 | 2.243     | 4.971E-2  |            |           | 1.509E+2  | 7.135E+1  | 5.828E-1  | -2.910E-3 | 1.244E-2  |
| 3 | 15 | 7.926E+34 | 2.835E+33 |            |           | 1.818E+36 | 8.507E+35 | 1.215E+34 | -6.540E-3 | 3.968E-2  |
| 4 | 15 | 2.455E+2  | 9.872     |            |           | 4.804E+2  | 2.560E+2  | 4.135     | 2.729E-2  | 3.969E-1  |
| 1 | 14 | 3.602E+2  | 1.545E+1  |            |           | 1.007E+3  | 4.022E+2  | 6.490     | -2.422E-1 | 4.511E-1  |
| 2 | 14 | 1.381E+1  | 5.773E-1  |            |           | 4.186E+1  | 1.837E+1  | 2.954E-1  | -1.225E-1 | 3.541E-2  |
| 3 | 14 | 3.075E+2  | 1.299E+1  |            |           | 5.138E+2  | 2.330E+2  | 3.808     | -1.743E-1 | 6.128E-1  |
| 4 | 14 | 6.743E+41 | 4.644E+40 | 1.601E+38  |           | 7.829E+43 | 4.574E+43 | 1.771E+42 | 6.641E-4  | 6.250E-3  |
| 5 | 14 | 1.846E+2  | 7.420     |            |           | 6.496E+2  | 3.793E+2  | 6.242     | 5.166E-2  | 1.907E-1  |
| 2 | 13 | 6.857     | 4.597E-1  | 1.030E-3   |           | 1.933E+2  | 8.713E+1  | 2.960     | -1.274E-2 | 3.787E-2  |
| 3 | 13 | 1.212E+12 | 5.355E+10 | -1.346E+8  | 1.729E+6  | 1.592E+13 | 6.776E+12 | 1.063E+11 | -4.439E-2 | 8.913E-2  |
| 4 | 13 | 4.898E+13 | 1.851E+12 | -1.050E+10 | 1.062E+8  | 8.957E+14 | 4.241E+14 | 4.618E+12 | -1.201E-2 | 5.215E-2  |
| 1 | 20 | -3.454E+6 | 5.875E+5  | 1.270E+4   | -7.765E+1 | -3.851E+7 | -4.610E+6 | 2.245E+6  | -1.117E-1 | 1.429E-1  |
| 2 | 20 | 3.422E+1  | 1.481     |            |           | 2.077E+2  | 8.018E+1  | 1.295     | -1.328E-1 | 2.202E-1  |
| 3 | 20 | 3.891E+40 | 4.569E+41 | 2.970E+39  |           | 2.228E+43 | 1.785E+44 | 7.933E+43 | -1.263E-4 | 1.890E-3  |
| 4 | 20 | 4.0424E+2 | 1.703E+1  |            |           | 7.623E+2  | 3.428E+2  | 5.582     | -1.660E-1 | 5.494E-1  |
| 5 | 20 | 1.783E+1  | 7.274E-1  |            |           | 2.471E+1  | 1.219E+1  | 0.1966E-1 | -5.203E-2 | 6.33E-1   |
| 3 | 17 | 4.537E+5  | 1.995E+4  |            |           | 3.980E+6  | 1.579E+6  | 2.607E+4  | -9.485E-2 | 1.497E-1  |
| 4 | 17 | 6.690E-3  | 1.713E-1  |            |           | 1.784E+1  | 2.317E+1  | 2.482E+1  | 1.890E-3  | 1.320E-3  |
| 2 | 18 | 9.111E+3  | 4.261E+2  |            |           | 1.629E+4  | 5.838E+4  | 9.873E+1  | -7.161E-1 | 8.842E-1  |



|   |    |            |            |          |            |            |            |           |            |          |          |
|---|----|------------|------------|----------|------------|------------|------------|-----------|------------|----------|----------|
| 3 | 18 | 1.034E+1   | 4.642E-1   | 1.662E+8 |            | 3.768E+1   | 1.390E+1   | 2.296E-1  | -2.925E-1  | 4.034E-1 |          |
| 4 | 18 | 4.729E+38  | 2.017E+37  |          |            | 7.782E+39  | 3.204E+39  | 5.203E+37 | -3.411E-2  | 7.252E-2 |          |
| 1 | 16 | 1.104E+1   | 5.244E-1   |          |            | 7.459      | 2.426      | 4.085E-2  | -2.657     | 2.738    |          |
| 2 | 16 | 1.318E+12  | 8.359E+10  |          |            | 1.435E+13  | 5.466E+12  | 1.489E+11 | -1.202E-1  | 1.450E-1 |          |
| 3 | 16 | 9.513E+4   | 3.461E+3   |          |            | 7.736E+6   | 2.944E+6   | 4.428E+4  | -8.160E-3  | 1.496E-2 |          |
| 4 | 16 | 6.307E+1   | 2.674      |          |            | 2.5427E+3  | 1.026E+3   | 1.641E+1  | -1.607E-2  | 3.071E-2 |          |
| 5 | 27 | 5.270E-3   | 2.609E-4   |          |            | 1.576E+1   | 7.053      | 1.458     | 4.056E-5   | 5.279E-5 |          |
| 2 | 21 | 3.695E+2   | 1.741E+1   |          |            | 8.904E+2   | 2.950E+2   | 4.947     | -6.986E-1  | 7.441E-1 |          |
| 3 | 21 | 5.886E+1   | 2.673      |          |            | 2.813E+2   | 9.583E+1   | 1.571     | -3.039E-1  | 3.510E-1 |          |
| 4 | 21 | 1.697E+2   | 7.417      |          |            | 7.946E+2   | 3.016E+2   | 4.950     | -1.876E-1  | 2.930E-1 |          |
| 2 | 22 | 8.382E+2   | 3.956E+1   |          |            | 6.026E+3   | 1.980E+3   | 3.325E+1  | -2.393E-1  | 2.522E-1 |          |
| 1 | 23 | 4.950E+2   | 2.332E+1   |          |            | 3.375E+4   | 1.020E+4   | 1.644E+2  | -3.043E-2  | 2.995E-2 |          |
| 2 | 23 | 1.310E+1   | 6.218E-1   |          |            | 4.290E+1   | 1.395E+1   | 2.347E-1  | -5.489E-1  | 5.652E-1 |          |
| 3 | 23 | 5.754E+42  | 2..656E+41 |          |            | 8.912E+43  | 2.985E+43  | 4.955E+41 | -1.024E-1  | 1.123E-1 |          |
| 4 | 23 | 1.251E+5   | 8.317E+3   | 1.857E+1 | 1.495E+6   | 6.044E+5   | 1.775E+4   | -8.946E-2 | 1.215E-1   |          |          |
| 5 | 23 | 1.466E-1   | 1.806E-2   | 2.953E+2 | 5.177E+1   | 2.168E+1   | 5.923      | 7.756E-4  | 7.022E-4   |          |          |
| 3 | 26 | 2.357E+6   | 1.556E+5   |          | 2.944E+6   | 1.056E+6   | 2.893E+4   | -1.340    | 1.425      |          |          |
| 4 | 26 | 4.265E+1   | 1.906      |          | 2.299E+2   | 8.535E+1   | 1.407      | -1.983E-1 | 2.708E-1   |          |          |
| 2 | 25 | 3.557E+2   | 1.679E+1   |          | 2.347E+3   | 7.557E+2   | 1.264E+1   | -2.822E-1 | 2.846E-1   |          |          |
| 3 | 25 | 6.235E+3   | 2.932E+2   |          | 5.155E+4   | 1.704E+4   | 2.867E+2   | -2.051E-1 | 2.170E-1   |          |          |
| 3 | 25 | 3.964E+2   | 1.825E+1   |          | 8.348E+2   | 3.045E+2   | 5.106      | -5.551E-1 | 7.228E-1   |          |          |
| 3 | 24 | 5.655E+3   | 2.715E+2   |          | 4.395E+4   | 1.361+4    | 2.299E+2   | -2.764E-1 | 2.592E-1   |          |          |
| 3 | 24 | 7.459      | 3.575E-1   |          | 8.352      | 2.835      | 4.839E-2   | -1.429    | 1.558      |          |          |
| 1 | 27 | 9.798E+40  | 4.282E+39  |          | 2.086E+43  | 5.869E+42  | 8.966E+40  | -9.970E-3 | 9.930E-3   |          |          |
| 2 | 27 | 6.291E+17  | 2.639E+16  |          | 8.288E+19  | 2.540E+19  | 3.674E+17  | -1.481E-2 | 1.471E-2   |          |          |
| 3 | 27 | 2.820E+40  | 7.383E+37  |          | -5.015E+36 | 3.410E+34  | 1.050E+43  | 3.448E+42 | -2.370E+40 | 4.180E-3 | 1.39E-3  |
| 4 | 27 | -2.186E+42 | 1.122E+42  |          | 1.049E+40  | -6.984E+37 | -2.791E+44 | 5.811E+43 | 4.587E+43  | 2.450E-3 | 7.110E-3 |
| 5 | 27 | 1.610E+1   | 7.527E-1   |          |            | 7.660      | 2.739      | 4.632E-2  | -2.678     | 3.324    |          |

**Table S21.** Rate coefficient (cm<sup>3</sup>/sec) for Ge-like Te<sup>20+</sup> for the transitions from initial to final levels with respective indices '*i*' and '*f*' and electron temperature 1 – 40 eV.

| Transitions |          | 1         | 2         | 5         | 10        | 20        | 30        | 40        |
|-------------|----------|-----------|-----------|-----------|-----------|-----------|-----------|-----------|
| <i>i</i>    | <i>f</i> |           |           |           |           |           |           |           |
| 1           | 7        | 4.350E-37 | 1.217E-23 | 1.121E-15 | 4.231E-13 | 7.029E-12 | 1.659E-11 | 2.457E-11 |
| 1           | 11       | 6.025E-44 | 1.502E-27 | 8.158E-18 | 1.193E-14 | 3.892E-13 | 1.149E-12 | 1.902E-12 |
| 1           | 13       | 2.802E-45 | 9.214E-29 | 6.178E-18 | 2.086E-14 | 1.032E-12 | 3.500E-12 | 6.208E-12 |
| 1           | 17       | 1.401E-45 | 1.000E-31 | 3.863E-19 | 5.034E-15 | 4.887E-13 | 2.074E-12 | 4.117E-12 |
| 1           | 19       | 5.605E-45 | 7.688E-32 | 9.564E-19 | 1.839E-14 | 2.169E-12 | 9.828E-12 | 2.014E-11 |
| 1           | 24       | 1.401E-45 | 2.251E-36 | 5.620E-22 | 2.935E-17 | 5.699E-15 | 3.046E-14 | 6.782E-14 |
| 1           | 27       | 3.554E-14 | 9.904E-14 | 1.996E-13 | 2.764E-13 | 3.441E-13 | 3.722E-13 | 3.841E-13 |
| 2           | 6        | 4.610E-29 | 4.154E-20 | 7.796E-15 | 3.772E-13 | 2.269E-12 | 3.835E-12 | 4.809E-12 |
| 2           | 7        | 9.531E-35 | 1.207E-23 | 4.362E-17 | 5.585E-15 | 5.364E-14 | 1.045E-13 | 1.396E-13 |
| 2           | 8        | 4.479E-34 | 2.302E-22 | 1.932E-15 | 3.290E-13 | 3.684E-12 | 7.635E-12 | 1.059E-11 |
| 2           | 10       | 1.925E-38 | 8.896E-25 | 1.106E-16 | 4.612E-14 | 8.052E-13 | 1.932E-12 | 2.885E-12 |
| 2           | 11       | 9.616E-39 | 1.092E-24 | 2.330E-16 | 1.161E-13 | 2.217E-12 | 5.481E-12 | 8.302E-12 |
| 2           | 12       | 7.780E-41 | 1.455E-26 | 4.181E-18 | 2.294E-15 | 4.565E-14 | 1.138E-13 | 1.725E-13 |
| 2           | 13       | 2.278E-42 | 1.724E-26 | 4.560E-17 | 5.251E-14 | 1.519E-12 | 4.312E-12 | 6.996E-12 |
| 2           | 14       | 9.809E-45 | 1.977E-28 | 9.511E-19 | 1.333E-15 | 4.238E-14 | 1.236E-13 | 2.028E-13 |
| 2           | 15       | 1.401E-45 | 9.965E-29 | 2.148E-18 | 4.972E-15 | 2.036E-13 | 6.480E-13 | 1.112E-12 |
| 2           | 17       | 2.802E-45 | 7.592E-30 | 1.149E-18 | 5.092E-15 | 2.883E-13 | 1.022E-12 | 1.855E-12 |
| 2           | 18       | 1.401E-45 | 2.544E-30 | 7.449E-19 | 4.109E-15 | 2.595E-13 | 9.544E-13 | 1.762E-12 |
| 2           | 19       | 1.401E-45 | 2.410E-30 | 1.042E-18 | 6.552E-15 | 4.419E-13 | 1.661E-12 | 3.102E-12 |
| 2           | 21       | 1.401E-45 | 8.941E-32 | 5.100E-19 | 7.568E-15 | 7.841E-13 | 3.401E-12 | 6.823E-12 |
| 2           | 22       | 1.401E-45 | 1.884E-32 | 1.408E-19 | 2.285E-15 | 2.477E-13 | 1.090E-12 | 2.204E-12 |
| 2           | 24       | 1.401E-45 | 2.027E-32 | 2.223E-19 | 4.101E-15 | 4.737E-13 | 2.130E-12 | 4.352E-12 |
| 2           | 25       | 4.203E-45 | 3.274E-33 | 5.498E-20 | 1.168E-15 | 1.448E-13 | 6.669E-13 | 1.378E-12 |
| 2           | 27       | 5.605E-45 | 6.362E-36 | 1.176E-21 | 5.555E-17 | 1.024E-14 | 5.378E-14 | 1.185E-13 |
| 3           | 6        | 2.846E-28 | 6.998E-20 | 6.036E-15 | 2.259E-13 | 1.198E-12 | 1.942E-12 | 2.386E-12 |
| 3           | 7        | 1.358E-32 | 4.697E-22 | 7.827E-16 | 7.799E-14 | 6.697E-13 | 1.271E-12 | 1.689E-12 |
| 3           | 8        | 1.608E-34 | 2.369E-23 | 9.394E-17 | 1.245E-14 | 1.227E-13 | 2.431E-13 | 3.291E-13 |
| 3           | 9        | 5.653E-35 | 5.564E-23 | 6.891E-16 | 1.334E-13 | 1.592E-12 | 3.367E-12 | 4.718E-12 |
| 3           | 11       | 5.180E-39 | 1.603E-25 | 1.568E-17 | 6.034E-15 | 1.010E-13 | 2.390E-13 | 3.539E-13 |
| 3           | 12       | 5.972E-38 | 3.049E-24 | 4.026E-16 | 1.712E-13 | 3.018E-12 | 7.267E-12 | 1.086E-11 |
| 3           | 13       | 5.473E-41 | 1.129E-25 | 1.369E-16 | 1.217E-13 | 3.097E-12 | 8.422E-12 | 1.337E-11 |
| 3           | 14       | 5.605E-44 | 3.290E-28 | 7.470E-19 | 8.145E-16 | 2.276E-14 | 6.342E-14 | 1.014E-13 |
| 3           | 15       | 1.121E-44 | 7.971E-28 | 8.122E-18 | 1.465E-14 | 5.300E-13 | 1.619E-12 | 2.726E-12 |
| 3           | 16       | 1.401E-45 | 1.277E-28 | 5.016E-18 | 1.418E-14 | 6.419E-13 | 2.113E-12 | 3.692E-12 |
| 3           | 17       | 2.802E-45 | 5.418E-31 | 3.752E-20 | 1.276E-16 | 6.292E-15 | 2.118E-14 | 3.727E-14 |
| 3           | 18       | 2.802E-45 | 2.420E-29 | 3.349E-18 | 1.440E-14 | 8.035E-13 | 2.836E-12 | 5.131E-12 |
| 3           | 19       | 1.401E-45 | 4.401E-31 | 8.985E-20 | 4.389E-16 | 2.602E-14 | 9.350E-14 | 1.703E-13 |
| 3           | 21       | 2.802E-45 | 1.979E-31 | 5.334E-19 | 6.164E-15 | 5.636E-13 | 2.345E-12 | 4.606E-12 |
| 3           | 23       | 1.401E-45 | 1.981E-31 | 1.002E-18 | 1.429E-14 | 1.451E-12 | 6.257E-12 | 1.251E-11 |
| 3           | 24       | 9.809E-45 | 1.977E-28 | 9.511E-19 | 1.333E-15 | 4.238E-14 | 1.236E-13 | 2.028E-13 |
| 3           | 25       | 1.401E-45 | 6.123E-33 | 5.643E-20 | 9.822E-16 | 1.101E-13 | 4.906E-13 | 9.969E-13 |
| 3           | 26       | 1.401E-45 | 8.161E-33 | 9.252E-20 | 1.726E-15 | 2.005E-13 | 9.042E-13 | 2.324E-12 |
| 3           | 27       | 5.605E-45 | 4.954E-36 | 5.015E-22 | 1.932E-17 | 3.200E-15 | 1.614E-14 | 3.476E-14 |
| 4           | 6        | 9.993E-24 | 4.121E-18 | 2.284E-15 | 8.358E-14 | 2.410E-13 | 3.209E-13 | 3.580E-13 |
| 4           | 7        | 1.563E-27 | 9.032E-20 | 3.276E-15 | 9.219E-14 | 4.252E-13 | 6.590E-13 | 7.919E-13 |
| 4           | 8        | 9.257E-29 | 2.164E-20 | 1.811E-15 | 6.707E-14 | 3.532E-13 | 5.705E-13 | 6.989E-13 |
| 4           | 9        | 2.939E-29 | 4.589E-20 | 1.196E-14 | 6.456E-13 | 4.098E-12 | 7.049E-12 | 8.919E-12 |

|   |    |           |           |           |           |           |           |           |
|---|----|-----------|-----------|-----------|-----------|-----------|-----------|-----------|
| 4 | 11 | 4.054E-34 | 2.090E-23 | 4.415E-17 | 4.743E-15 | 4.200E-14 | 8.011E-14 | 1.062E-13 |
| 4 | 12 | 2.256E-33 | 1.918E-22 | 5.477E-16 | 6.521E-14 | 6.110E-13 | 1.193E-12 | 1.606E-12 |
| 4 | 13 | 8.418E-37 | 2.749E-24 | 6.988E-17 | 1.718E-14 | 2.308E-13 | 5.079E-13 | 7.258E-13 |
| 4 | 14 | 1.335E-36 | 1.245E-23 | 5.939E-16 | 1.800E-13 | 2.682E-12 | 6.109E-12 | 8.882E-12 |
| 4 | 15 | 3.744E-39 | 4.253E-25 | 9.071E-17 | 2.297E-14 | 8.629E-13 | 2.132E-12 | 3.229E-12 |
| 4 | 16 | 2.075E-42 | 2.233E-27 | 1.831E-18 | 1.424E-15 | 3.370E-14 | 8.902E-14 | 1.388E-13 |
| 4 | 17 | 2.331E-41 | 6.493E-26 | 9.429E-17 | 8.897E-14 | 2.331E-12 | 6.402E-12 | 1.021E-11 |
| 4 | 18 | 2.690E-43 | 2.369E-27 | 6.856E-18 | 8.136E-15 | 2.389E-13 | 6.815E-13 | 1.108E-12 |
| 4 | 19 | 1.317E-43 | 2.225E-27 | 9.508E-18 | 1.284E-14 | 4.024E-13 | 1.172E-12 | 1.928E-12 |
| 4 | 21 | 1.401E-45 | 4.597E-29 | 2.587E-18 | 8.241E-15 | 3.958E-13 | 1.328E-12 | 2.343E-12 |
| 4 | 23 | 1.401E-45 | 2.372E-29 | 2.507E-18 | 9.850E-15 | 5.254E-13 | 1.826E-12 | 3.279E-12 |
| 4 | 24 | 2.802E-45 | 1.581E-29 | 1.722E-18 | 6.836E-15 | 3.666E-13 | 1.277E-12 | 2.295E-12 |
| 4 | 25 | 2.802E-45 | 3.332E-29 | 6.226E-18 | 2.958E-14 | 1.735E-12 | 6.229E-12 | 1.136E-11 |
| 4 | 26 | 1.401E-45 | 2.854E-30 | 3.223E-18 | 2.788E-14 | 2.207E-12 | 8.754E-12 | 1.679E-11 |
| 4 | 27 | 1.401E-45 | 9.327E-33 | 1.804E-20 | 1.862E-16 | 1.602E-14 | 6.510E-14 | 1.260E-13 |
| 5 | 7  | 8.174E-25 | 2.032E-18 | 1.126E-14 | 1.709E-13 | 5.841E-13 | 8.219E-13 | 9.421E-13 |
| 5 | 11 | 9.637E-30 | 2.134E-20 | 6.861E-15 | 3.966E-13 | 2.603E-12 | 4.526E-12 | 5.754E-12 |
| 5 | 13 | 3.987E-33 | 5.876E-22 | 2.332E-15 | 3.099E-13 | 3.069E-12 | 6.110E-12 | 8.310E-12 |
| 5 | 17 | 1.502E-38 | 1.886E-24 | 4.272E-16 | 2.173E-13 | 4.189E-12 | 1.038E-11 | 1.576E-11 |
| 5 | 19 | 1.774E-41 | 1.346E-26 | 8.970E-18 | 6.529E-15 | 1.503E-13 | 3.953E-13 | 6.172E-13 |
| 5 | 24 | 2.802E-45 | 1.875E-29 | 3.078E-19 | 6.479E-16 | 2.511E-14 | 7.798E-14 | 1.317E-13 |
| 5 | 27 | 1.401E-45 | 5.595E-29 | 1.689E-17 | 9.415E-14 | 5.983E-12 | 2.205E-11 | 4.079E-11 |

**Table S22.** Rate coefficient (cm<sup>3</sup>/sec) for Ge-like Sb<sup>19+</sup> for the transitions from initial to final levels with respective indices '*i*' and '*f*' and electron temperature 1 – 40 eV.

| Transition |          | 1          | 2         | 5         | 10        | 20        | 30        | 40        |
|------------|----------|------------|-----------|-----------|-----------|-----------|-----------|-----------|
| <i>i</i>   | <i>f</i> |            |           |           |           |           |           |           |
| 1          | 7        | 1.216E-35  | 5.010E-23 | 1.473E-15 | 3.854E-13 | 5.467E-12 | 1.248E-11 | 1.839E-11 |
| 1          | 11       | 6.584E-42  | 1.244E-26 | 1.443E-17 | 1.280E-14 | 3.335E-13 | 9.311E-13 | 1.516E-12 |
| 1          | 13       | 5.6056E-45 | 7.242E-28 | 1.069E-17 | 2.211E-14 | 8.770E-13 | 2.814E-12 | 4.910E-12 |
| 1          | 17       | 0          | 9.326E-31 | 5.278E-19 | 3.673E-15 | 2.666E-13 | 1.045E-12 | 2.015E-12 |
| 1          | 19       | 0          | 8.469E-31 | 1.952E-18 | 2.169E-14 | 1.987E-12 | 8.419E-12 | 1.686E-11 |
| 1          | 23       | 0          | 3.884E-35 | 1.533E-21 | 4.385E-17 | 6.435E-15 | 3.185E-14 | 6.895E-14 |
| 1          | 27       | 0          | 2.423E-37 | 2.423E-37 | 1.086E-17 | 2.520E-15 | 1.451E-14 | 3.387E-14 |
| 2          | 6        | 2.602E-28  | 7.536E-20 | 7.209E-15 | 2.821E-13 | 1.560E-12 | 2.610E-12 | 3.291E-12 |
| 2          | 7        | 4.982E-34  | 1.793E-23 | 3.061E-17 | 3.075E-15 | 2.653E-14 | 5.044E-14 | 6.693E-14 |
| 2          | 8        | 6.659E-33  | 7.236E-22 | 2.409E-15 | 3.057E-13 | 3.027E-12 | 6.139E-12 | 8.523E-12 |
| 2          | 10       | 4.500E-37  | 3.387E-24 | 1.430E-16 | 4.218E-14 | 6.352E-13 | 1.479E-12 | 2.201E-12 |
| 2          | 11       | 2.714E-37  | 4.493E-24 | 3.043E-16 | 1.050E-13 | 1.709E-12 | 4.086E-12 | 6.157E-12 |
| 2          | 12       | 1.561E-39  | 4.287E-26 | 3.922E-18 | 1.489E-15 | 2.519E-14 | 6.057E-14 | 9.111E-14 |
| 2          | 13       | 6.139E-41  | 7.069E-26 | 6.093E-17 | 4.898E-14 | 1.213E-12 | 3.334E-12 | 5.384E-12 |
| 2          | 14       | 6.754E-43  | 1.414E-27 | 1.741E-18 | 1.573E-15 | 4.117E-14 | 1.148E-13 | 1.864E-13 |
| 2          | 15       | 8.407E-45  | 3.325E-28 | 2.392E-18 | 3.892E-15 | 1.369E-13 | 4.219E-13 | 7.212E-13 |
| 2          | 17       | 0          | 7.593E-29 | 2.506E-18 | 6.775E-15 | 3.070E-13 | 1.029E-12 | 1.836E-12 |

|   |    |           |           |           |           |           |           |           |
|---|----|-----------|-----------|-----------|-----------|-----------|-----------|-----------|
| 2 | 18 | 0         | 7.330E-29 | 6.601E-18 | 2.492E-14 | 1.334E-12 | 4.729E-12 | 8.672E-12 |
| 2 | 19 | 0         | 8.465E-30 | 1.138E-18 | 4.909E-15 | 2.807E-13 | 1.017E-12 | 1.885E-12 |
| 2 | 21 | 0         | 6.781E-31 | 8.582E-19 | 7.808E-15 | 6.477E-13 | 2.654E-12 | 5.231E-12 |
| 2 | 22 | 0         | 1.487E-31 | 2.410E-19 | 2.381E-15 | 2.058E-13 | 8.550E-13 | 1.696E-12 |
| 2 | 23 | 0         | 1.730E-31 | 3.982E-19 | 4.422E-15 | 4.051E-13 | 1.715E-12 | 3.436E-12 |
| 2 | 25 | 0         | 2.837E-32 | 1.056E-19 | 1.375E-15 | 1.364E-13 | 5.933E-13 | 1.203E-12 |
| 2 | 27 | 0         | 5.665E-35 | 2.061E-21 | 5.735E-17 | 8.295E-15 | 4.083E-14 | 8.810E-14 |
| 3 | 6  | 1.407E-27 | 1.207E-19 | 5.577E-15 | 1.715E-13 | 8.426E-13 | 1.354E-12 | 1.674E-12 |
| 3 | 7  | 7.791E-32 | 8.332E-22 | 6.918E-16 | 5.536E-14 | 4.362E-13 | 8.198E-13 | 1.095E-12 |
| 3 | 8  | 2.089E-33 | 6.718E-23 | 1.077E-16 | 1.070E-14 | 9.346E-14 | 1.811E-13 | 2.452E-13 |
| 3 | 9  | 1.069E-33 | 1.964E-22 | 8.957E-16 | 1.261E-13 | 1.314E-12 | 2.708E-12 | 3.789E-12 |
| 3 | 11 | 1.341E-37 | 6.578E-25 | 2.147E-17 | 5.811E-15 | 8.371E-14 | 1.919E-13 | 2.831E-13 |
| 3 | 12 | 1.457E-36 | 1.186E-23 | 5.248E-16 | 1.572E-13 | 2.385E-12 | 5.569E-12 | 8.295E-12 |
| 3 | 13 | 1.247E-39 | 4.251E-25 | 1.766E-16 | 1.113E-13 | 2.447E-12 | 6.459E-12 | 1.022E-11 |
| 3 | 14 | 7.533E-42 | 4.667E-27 | 2.771E-18 | 1.964E-15 | 4.559E-14 | 1.222E-13 | 1.946E-13 |
| 3 | 15 | 2.270E-43 | 2.660E-27 | 9.228E-18 | 1.178E-14 | 3.676E-13 | 1.089E-12 | 1.827E-12 |
| 3 | 16 | 5.605E-45 | 4.869E-28 | 6.006E-18 | 1.170E-14 | 4.504E-13 | 1.431E-12 | 2.484E-12 |
| 3 | 17 | 0         | 1.857E-30 | 2.939E-20 | 6.177E-17 | 2.437E-15 | 7.724E-15 | 1.329E-14 |
| 3 | 18 | 0         | 1.039E-28 | 4.509E-18 | 1.335E-14 | 6.330E-13 | 2.155E-12 | 3.872E-12 |
| 3 | 19 | 0         | 1.982E-30 | 1.283E-19 | 4.334E-16 | 2.189E-14 | 7.594E-14 | 1.375E-13 |
| 3 | 21 | 0         | 1.377E-30 | 8.398E-19 | 5.991E-15 | 4.403E-13 | 1.733E-12 | 3.347E-12 |
| 3 | 23 | 0         | 1.152E-31 | 1.278E-19 | 1.112E-15 | 9.030E-14 | 3.673E-13 | 7.211E-13 |
| 3 | 24 | 0         | 1.509E-30 | 1.699E-18 | 1.486E-14 | 1.209E-12 | 4.926E-12 | 9.677E-12 |
| 3 | 25 | 0         | 6.837E-32 | 1.226E-19 | 1.252E-15 | 1.100E-13 | 4.596E-13 | 9.141E-13 |
| 3 | 26 | 0         | 5.869E-33 | 6.286E-20 | 1.164E-15 | 1.376E-13 | 6.341E-13 | 1.324E-12 |
| 3 | 27 | 0         | 5.215E-35 | 9.141E-22 | 1.989E-17 | 2.533E-15 | 1.191E-14 | 2.505E-14 |
| 4 | 6  | 1.571E-23 | 4.422E-18 | 6.705E-15 | 6.710E-14 | 1.902E-13 | 2.554E-13 | 2.885E-13 |
| 4 | 7  | 3.020E-27 | 1.055E-19 | 2.847E-15 | 7.337E-14 | 3.303E-13 | 5.163E-13 | 6.294E-13 |
| 4 | 8  | 2.788E-28 | 2.929E-20 | 1.526E-15 | 4.880E-14 | 2.437E-13 | 3.933E-13 | 4.864E-13 |
| 4 | 9  | 1.283E-28 | 7.686E-20 | 1.136E-14 | 5.135E-13 | 3.051E-12 | 5.225E-12 | 6.669E-12 |
| 4 | 11 | 1.673E-33 | 2.671E-23 | 2.807E-17 | 2.412E-15 | 1.943E-14 | 3.640E-14 | 4.822E-14 |
| 4 | 12 | 1.192E-32 | 3.161E-22 | 4.520E-16 | 4.329E-14 | 3.723E-13 | 7.198E-13 | 9.750E-13 |
| 4 | 13 | 3.749E-36 | 4.164E-24 | 5.584E-17 | 1.125E-14 | 1.400E-13 | 3.063E-13 | 4.414E-13 |
| 4 | 14 | 2.091E-35 | 4.220E-23 | 8.097E-16 | 1.837E-13 | 2.428E-12 | 5.415E-12 | 7.884E-12 |
| 4 | 15 | 1.543E-38 | 5.901E-25 | 6.601E-17 | 2.691E-14 | 4.757E-13 | 1.168E-12 | 1.784E-12 |
| 4 | 16 | 1.242E-41 | 3.934E-27 | 1.559E-18 | 9.645E-16 | 2.082E-14 | 5.428E-14 | 8.506E-14 |
| 4 | 17 | 5.195E-40 | 2.518E-25 | 1.291E-16 | 8.739E-14 | 1.987E-12 | 5.307E-12 | 8.451E-12 |
| 4 | 18 | 1.982E-42 | 5.121E-27 | 7.165E-18 | 6.767E-15 | 1.817E-13 | 5.125E-13 | 8.386E-13 |
| 4 | 19 | 5.549E-43 | 2.799E-27 | 5.848E-18 | 6.310E-15 | 1.810E-13 | 5.220E-13 | 8.636E-13 |
| 4 | 21 | 1.401E-45 | 1.924E-28 | 3.782E-18 | 8.600E-15 | 3.575E-13 | 1.164E-12 | 2.047E-12 |
| 4 | 23 | 0         | 5.752E-29 | 2.055E-18 | 5.706E-15 | 2.620E-13 | 8.827E-13 | 1.577E-12 |
| 4 | 24 | 0         | 9.082E-29 | 3.293E-18 | 9.186E-15 | 4.227E-13 | 1.424E-12 | 2.547E-12 |
| 4 | 25 | 0         | 1.391E-28 | 8.041E-18 | 2.618E-14 | 1.302E-12 | 4.505E-12 | 8.161E-12 |
| 4 | 26 | 0         | 1.257E-29 | 4.336E-18 | 2.559E-14 | 1.712E-12 | 6.533E-12 | 1.242E-11 |
| 4 | 27 | 0         | 4.259E-32 | 2.405E-20 | 1.669E-16 | 1.205E-14 | 4.705E-14 | 9.028E-14 |
| 5 | 7  | 1.287E-24 | 2.186E-18 | 9.686E-15 | 1.377E-13 | 4.638E-13 | 6.591E-13 | 7.665E-13 |
| 5 | 11 | 4.759E-29 | 3.689E-20 | 6.363E-15 | 3.025E-13 | 1.841E-12 | 3.179E-12 | 4.071E-12 |
| 5 | 13 | 1.901E-32 | 1.023E-21 | 2.237E-15 | 2.468E-13 | 2.281E-12 | 4.521E-12 | 6.207E-12 |
| 5 | 17 | 2.819E-37 | 6.619E-24 | 5.528E-16 | 5.528E-16 | 3.446E-12 | 8.332E-12 | 1.262E-11 |
| 5 | 19 | 2.915E-41 | 7.116E-27 | 2.418E-18 | 1.425E-15 | 3.025E-14 | 7.886E-14 | 1.240E-13 |
| 5 | 23 | 1.401E-45 | 4.689E-29 | 2.715E-19 | 4.090E-16 | 1.371E-14 | 4.128E-14 | 6.939E-14 |
| 5 | 27 | 0         | 2.485E-28 | 2.287E-17 | 8.697E-14 | 4.673E-12 | 1.658E-11 | 3.042E-11 |

**Table S23.** Rate coefficient (cm<sup>3</sup>/sec) for Ge-like Sn<sup>18+</sup> for the transitions from initial to final levels with respective indices '*i*' and '*f*' and electron temperature 1 – 40 eV.

| Transitions |          | 1         | 2         | 5         | 10        | 20         | 30        | 40        |
|-------------|----------|-----------|-----------|-----------|-----------|------------|-----------|-----------|
| <i>i</i>    | <i>f</i> |           |           |           |           |            |           |           |
| 1           | 7        | 8.431E-34 | 8.431E-34 | 5.255-15  | 9.375E-13 | 1.075E-11  | 2.248E-11 | 3.135E-11 |
| 1           | 11       | 1.700E-39 | 2.730E-25 | 7.170E-17 | 3.834E-14 | 7.583E-13  | 1.899E-12 | 2.897E-12 |
| 1           | 13       | 1.304E-42 | 1.526E-26 | 5.242E-17 | 6.590E-14 | 1.994E-12  | 5.752E-12 | 9.413E-12 |
| 1           | 16       | 0         | 2.720E-29 | 2.428E-18 | 9.029E-15 | 4.694E-13  | 1.620E-12 | 2.902E-12 |
| 1           | 19       | 0         | 2.088E-29 | 6.854E-23 | 6.703E-14 | 4.625E-12  | 1.755E-11 | 3.295E-11 |
| 1           | 23       | 0         | 2.197E-33 | 1.288E-20 | 1.931E-16 | 2.012E-14  | 8.758E-14 | 1.760E-13 |
| 1           | 27       | 0         | 1.392E-35 | 1.139E-21 | 4.104E-17 | 6.625E-15  | 3.332E-14 | 7.199E-14 |
| 2           | 6        | 3.425E-27 | 3.231E-19 | 1.572E-14 | 4.875E-13 | 2.358E-12  | 3.715E-12 | 4.501E-12 |
| 2           | 7        | 9.758E-33 | 1.017E-22 | 8.217E-17 | 6.370E-15 | 4.725E-14  | 8.375E-14 | 1.058E-13 |
| 2           | 8        | 2.405E-31 | 5.822E-21 | 7.836E-15 | 7.279E-13 | 6.044E-12  | 1.136E-11 | 1.502E-11 |
| 2           | 10       | 8.080E-35 | 3.485E-23 | 1.356E-15 | 1.040E-13 | 1.277E-12  | 3.852E-12 | 4.635E-12 |
| 2           | 11       | 1.900E-35 | 4.925E-23 | 1.090E-15 | 2.563E-13 | 3.370E-12  | 1.051E-11 | 1.273E-11 |
| 2           | 12       | 8.681E-38 | 3.721E-25 | 1.109E-17 | 2.862E-15 | 3.895E-14  | 8.530E-14 | 1.208E-13 |
| 2           | 13       | 4.216E-39 | 7.957E-25 | 2.301E-16 | 1.270E-13 | 2.553E-12  | 6.427E-12 | 9.829E-12 |
| 2           | 14       | 1.183E-40 | 2.703E-26 | 8.754E-18 | 5.009E-15 | 1.020E-13  | 2.572E-13 | 3.928E-13 |
| 2           | 15       | 5.212E-43 | 3.372E-27 | 8.114E-18 | 9.055E-15 | 2.580E-13  | 7.284E-13 | 1.178E-12 |
| 2           | 16       | 4.203E-44 | 1.830E-27 | 1.374E-17 | 2.242E-14 | 7.728E-13  | 2.326E-12 | 3.890E-12 |
| 2           | 18       | 2.802E-45 | 9.463E-28 | 2.583E-17 | 6.476E-14 | 2.766E-12  | 8.945E-12 | 1.550E-11 |
| 2           | 19       | 0         | 9.486E-29 | 7.867E-23 | 1.122E-14 | 5.132E-13  | 1.697E-12 | 2.974E-12 |
| 2           | 21       | 0         | 1.484E-29 | 4.202E-18 | 2.294E-14 | 1.445E-12  | 5.320E-12 | 9.839E-12 |
| 2           | 22       | 0         | 3.350E-30 | 1.196E-18 | 7.062E-15 | 4.623E-13  | 1.723E-12 | 3.208E-12 |
| 2           | 23       | 0         | 4.170E-30 | 2.057E-18 | 1.352E-14 | 9.344E-13  | 3.546E-12 | 6.660E-12 |
| 2           | 25       | 0         | 8.353E-31 | 6.314E-19 | 4.781E-15 | 3.545E-13  | 1.377E-12 | 2.617E-12 |
| 2           | 27       | 0         | 1.646E-33 | 4.984E-21 | 1.770E-16 | 1.889E-14  | 8.275E-14 | 1.667E-13 |
| 3           | 6        | 1.671E-26 | 4.947E-19 | 1.203E-14 | 2.969E-13 | 1.284E-12  | 1.950E-12 | 2.320E-12 |
| 3           | 7        | 1.175E-30 | 3.854E-21 | 1.566E-15 | 9.790E-14 | 6.683E-13  | 1.177E-12 | 1.508E-12 |
| 3           | 8        | 6.327E-32 | 4.799E-22 | 7.131E-16 | 2.370E-14 | 1.7464E-13 | 3.144E-13 | 4.059E-13 |
| 3           | 9        | 4.934E-32 | 1.796E-21 | 3.086E-15 | 3.108E-13 | 2.684E-12  | 5.108E-12 | 6.795E-12 |
| 3           | 11       | 9.216E-36 | 7.488E-24 | 8.266E-17 | 1.541E-14 | 1.805E-13  | 3.796E-13 | 5.304E-13 |
| 3           | 12       | 9.340E-35 | 1.256E-22 | 1.877E-15 | 3.874E-13 | 4.775E-12  | 1.022E-11 | 1.442E-11 |
| 3           | 13       | 7.559E-38 | 4.471E-24 | 6.451E-16 | 2.827E-13 | 5.065E-12  | 1.227E-11 | 1.842E-11 |
| 3           | 14       | 1.922E-39 | 1.376E-25 | 2.224E-17 | 1.011E-14 | 1.841E-13  | 4.477E-13 | 6.723E-13 |
| 3           | 15       | 1.230E-41 | 2.492E-26 | 2.991E-17 | 2.650E-14 | 6.734E-13  | 1.831E-12 | 2.910E-12 |
| 3           | 16       | 2.802E-45 | 3.943E-29 | 1.468E-19 | 1.880E-16 | 5.652E-15  | 1.603E-14 | 2.577E-14 |
| 3           | 17       | 3.951E-43 | 5.543E-27 | 2.121E-17 | 2.764E-14 | 8.517E-13  | 2.470E-12 | 4.053E-12 |
| 3           | 18       | 1.121E-44 | 1.317E-27 | 1.793E-17 | 3.565E-14 | 1.356E-12  | 4.219E-12 | 7.171E-12 |
| 3           | 19       | 0         | 2.702E-29 | 5.543E-19 | 1.261E-15 | 5.113E-14  | 1.620E-13 | 2.775E-13 |
| 3           | 21       | 0         | 2.692E-29 | 3.799E-18 | 1.645E-14 | 9.230E-13  | 3.267E-12 | 5.925E-12 |
| 3           | 23       | 0         | 2.662E-30 | 6.549E-19 | 3.412E-15 | 2.099E-13  | 7.664E-13 | 1.411E-12 |
| 3           | 24       | 0         | 3.214E-29 | 8.280E-18 | 4.382E-14 | 2.717E-12  | 9.951E-12 | 1.835E-11 |
| 3           | 25       | 0         | 1.967E-30 | 7.412E-19 | 4.452E-15 | 2.940E-13  | 1.099E-12 | 2.048E-12 |
| 3           | 26       | 0         | 1.570E-31 | 3.421E-19 | 3.686E-15 | 3.259E-13  | 1.342E-12 | 2.626E-12 |
| 3           | 27       | 0         | 1.581E-33 | 5.413E-21 | 6.748E-17 | 6.366E-15  | 2.662E-14 | 5.222E-14 |
| 4           | 6        | 5.195E-23 | 9.602E-18 | 1.129E-14 | 1.033E-13 | 2.766E-13  | 3.598E-13 | 3.968E-13 |
| 4           | 7        | 1.430E-26 | 2.916E-19 | 5.677E-15 | 1.302E-13 | 5.437E-13  | 8.163E-13 | 9.660E-13 |
| 4           | 8        | 2.038E-27 | 9.611E-20 | 3.086E-15 | 8.335E-14 | 3.759E-13  | 5.773E-13 | 6.897E-13 |
| 4           | 9        | 1.419E-27 | 3.210E-19 | 2.635E-14 | 9.709E-13 | 5.114E-12  | 8.283E-12 | 1.017E-11 |

|   |    |           |           |           |           |           |           |           |
|---|----|-----------|-----------|-----------|-----------|-----------|-----------|-----------|
| 4 | 11 | 2.099E-32 | 1.056E-22 | 5.524E-17 | 3.718E-15 | 2.584E-14 | 4.506E-14 | 5.672E-14 |
| 4 | 12 | 1.600E-31 | 1.335E-21 | 9.495E-16 | 7.133E-14 | 5.323E-13 | 9.645E-13 | 1.250E-12 |
| 4 | 13 | 4.762E-35 | 1.746E-23 | 3.051E-16 | 1.907E-14 | 2.066E-13 | 4.238E-13 | 5.852E-13 |
| 4 | 14 | 8.448E-34 | 3.749E-22 | 2.882E-15 | 4.771E-13 | 5.271E-12 | 1.088E-11 | 1.508E-11 |
| 4 | 15 | 2.066E-37 | 2.593E-24 | 1.477E-16 | 4.752E-14 | 7.300E-13 | 1.680E-12 | 2.458E-12 |
| 4 | 16 | 3.295E-38 | 2.758E-24 | 4.901E-16 | 2.301E-13 | 4.268E-12 | 1.046E-11 | 1.578E-11 |
| 4 | 17 | 2.925E-40 | 2.535E-26 | 4.587E-18 | 2.155E-15 | 3.958E-14 | 9.586E-14 | 1.429E-13 |
| 4 | 18 | 4.940E-41 | 3.555E-26 | 2.294E-17 | 1.654E-14 | 3.796E-13 | 9.987E-13 | 1.561E-12 |
| 4 | 19 | 9.121E-42 | 1.303E-26 | 4.365E-17 | 1.049E-14 | 2.576E-13 | 6.932E-13 | 1.095E-12 |
| 4 | 21 | 7.006E-44 | 2.478E-27 | 1.657E-17 | 1.163E-14 | 8.785E-13 | 2.626E-12 | 4.376E-12 |
| 4 | 23 | 7.006E-45 | 6.230E-28 | 7.262E-18 | 1.371E-14 | 5.082E-13 | 1.567E-12 | 2.653E-12 |
| 4 | 24 | 1.121E-44 | 1.053E-27 | 1.285E-17 | 2.463E-14 | 9.197E-13 | 2.843E-12 | 4.817E-12 |
| 4 | 25 | 9.809E-45 | 1.699E-27 | 3.034E-17 | 6.603E-14 | 2.628E-12 | 8.301E-12 | 1.422E-11 |
| 4 | 26 | 1.401E-45 | 1.680E-28 | 1.734E-17 | 6.769E-14 | 3.606E-12 | 1.255E-11 | 2.258E-11 |
| 4 | 27 | 1.401E-45 | 6.614E-31 | 1.073E-19 | 4.856E-16 | 2.770E-14 | 9.819E-14 | 1.776E-13 |
| 5 | 7  | 4.810E-24 | 5.213E-18 | 1.760E-14 | 2.272E-13 | 7.186E-13 | 9.868E-13 | 1.118E-12 |
| 5 | 11 | 5.999E-28 | 1.604E-19 | 1.455E-14 | 5.541E-13 | 2.964E-12 | 4.822E-12 | 5.935E-12 |
| 5 | 13 | 2.492E-31 | 4.843E-21 | 8.122E-15 | 3.125E-13 | 4.132E-12 | 7.713E-12 | 1.016E-11 |
| 5 | 16 | 2.492E-31 | 4.843E-21 | 5.715E-15 | 5.083E-13 | 4.132E-12 | 7.713E-12 | 9.071E-12 |
| 5 | 19 | 1.476E-40 | 1.116E-26 | 1.863E-18 | 8.550E-16 | 1.560E-14 | 3.789E-14 | 5.679E-14 |
| 5 | 23 | 9.668E-44 | 4.587E-28 | 9.124E-19 | 9.488E-16 | 2.573E-14 | 7.063E-14 | 1.117E-13 |
| 5 | 27 | 8.407E-45 | 3.268E-27 | 9.121E-17 | 2.303E-13 | 9.872E-12 | 3.197E-11 | 5.545E-11 |

**Table S24.** Rate coefficient (cm<sup>3</sup>/sec) for Ge-like In<sup>17+</sup> for the transitions from initial to final levels with respective indices '*i*' and '*f*' and electron temperature 1 – 40 eV.

| Transition |          | 1         | 2          | 5         | 10        | 20        | 30        | 40        |
|------------|----------|-----------|------------|-----------|-----------|-----------|-----------|-----------|
| <i>i</i>   | <i>f</i> |           |            |           |           |           |           |           |
| 1          | 7        | 1.823E-32 | 1.998E-21  | 6.692E-15 | 8.512E-13 | 8.450E-12 | 1.716E-11 | 2.386E-11 |
| 1          | 11       | 1.177E-37 | 1.8359E-24 | 1.199E-16 | 4.093E-14 | 6.633E-13 | 1.584E-12 | 2.388E-12 |
| 1          | 14       | 8.222E-41 | 9.660E-26  | 8.430E-17 | 6.809E-14 | 1.693E-12 | 4.661E-12 | 7.541E-12 |
| 1          | 16       | 1.401E-45 | 2.569E-28  | 4.045E-18 | 8.552E-15 | 3.434E-13 | 1.107E-12 | 1.939E-12 |
| 1          | 19       | 0         | 1.599E-28  | 1.765E-17 | 7.137E-14 | 3.958E-12 | 1.421E-11 | 2.624E-11 |
| 1          | 23       | 0         | 3.730E-32  | 3.555E-20 | 2.945E-16 | 2.334E-14 | 2.904E-14 | 6.086E-14 |
| 1          | 27       | 0         | 2.320E-34  | 2.728E-21 | 5.214E-17 | 6.264E-15 | 2.904E-14 | 6.086E-14 |
| 2          | 6        | 1.831E-26 | 5.711E-19  | 1.440E-14 | 3.632E-13 | 1.618E-12 | 2.522E-12 | 3.071E-12 |
| 2          | 8        | 2.879E-30 | 1.657E-20  | 9.499E-15 | 6.728E-13 | 4.996E-12 | 9.218E-12 | 1.221E-11 |
| 2          | 10       | 5.078E-34 | 1.207E-22  | 6.429E-16 | 9.540E-14 | 1.022E-12 | 2.129E-12 | 2.997E-12 |
| 2          | 11       | 4.092E-34 | 2.299E-13  | 1.372E-15 | 2.299E-13 | 2.616E-12 | 5.558E-12 | 7.903E-12 |
| 2          | 12       | 1.236E-36 | 8.774E-25  | 8.943E-18 | 1.628E-15 | 1.893E-14 | 3.986E-14 | 5.577E-14 |
| 2          | 13       | 5.163E-39 | 1.427E-25  | 1.313E-17 | 5.009E-15 | 8.545E-14 | 2.069E-13 | 3.133E-13 |
| 2          | 14       | 8.788E-38 | 2.896E-24  | 2.965E-16 | 1.174E-13 | 2.049E-12 | 5.017E-12 | 7.655E-12 |
| 2          | 15       | 1.036E-41 | 1.123E-26  | 9.339E-18 | 7.416E-15 | 1.826E-13 | 5.004E-13 | 8.071E-13 |
| 2          | 16       | 3.137E-42 | 1.285E-26  | 2.371E-17 | 2.457E-14 | 6.919E-13 | 1.984E-12 | 3.276E-12 |
| 2          | 18       | 7.707E-44 | 4.061E-27  | 3.449E-17 | 5.941E-14 | 2.154E-12 | 6.719E-12 | 1.156E-11 |
| 2          | 19       | 1.915E-13 | 3.616E-28  | 4.678E-18 | 9.266E-15 | 3.600E-13 | 1.148E-12 | 1.999E-12 |
| 2          | 21       | 0         | 1.033E-28  | 6.895E-18 | 2.357E-14 | 1.202E-12 | 4.200E-12 | 7.649E-12 |
| 2          | 22       | 0         | 2.410E-29  | 1.997E-18 | 7.339E-15 | 3.881E-13 | 1.371E-12 | 2.513E-12 |
| 2          | 23       | 0         | 3.191E-29  | 3.565E-18 | 1.447E-14 | 8.042E-13 | 2.889E-12 | 5.336E-12 |
| 2          | 25       | 0         | 7.689E-30  | 1.254E-18 | 5.773E-15 | 3.415E-13 | 1.252E-12 | 2.336E-12 |

|   |    |           |            |           |           |           |           |           |
|---|----|-----------|------------|-----------|-----------|-----------|-----------|-----------|
| 2 | 27 | 0         | 7.689E-30  | 1.254E-18 | 5.773E-15 | 3.415E-13 | 1.252E-12 | 2.336E-12 |
| 3 | 6  | 8.338E-26 | 8.645E-19  | 1.128E-14 | 2.290E-13 | 9.170E-13 | 1.379E-12 | 1.649E-12 |
| 3 | 7  | 6.620E-30 | 6.766E-21  | 1.377E-15 | 6.922E-14 | 4.335E-13 | 7.557E-13 | 9.731E-13 |
| 3 | 8  | 5.999E-31 | 1.146E-21  | 3.389E-16 | 1.922E-14 | 1.270E-13 | 2.245E-13 | 2.902E-13 |
| 3 | 9  | 7.424E-31 | 5.744E-21  | 3.929E-15 | 2.950E-13 | 2.253E-12 | 4.194E-12 | 5.581E-12 |
| 3 | 11 | 1.948E-34 | 2.829E-23  | 1.120E-16 | 1.506E-14 | 1.534E-13 | 3.139E-13 | 4.378E-13 |
| 3 | 12 | 1.893E-33 | 4.474E-22  | 2.374E-15 | 3.518E-13 | 3.767E-12 | 7.845E-12 | 1.104E-11 |
| 3 | 13 | 1.074E-37 | 2.544E-18  | 4.693E-17 | 1.439E-14 | 2.209E-13 | 5.177E-13 | 7.722E-13 |
| 3 | 14 | 1.404E-36 | 1.536E-23  | 8.123E-16 | 2.583E-13 | 4.042E-12 | 9.544E-12 | 1.430E-11 |
| 3 | 15 | 2.112E-40 | 7.601E-26  | 1.339E-15 | 2.080E-14 | 4.597E-13 | 1.216E-12 | 1.928E-12 |
| 3 | 16 | 2.312E-43 | 3.143E-28  | 2.980E-19 | 2.457E-16 | 6.100E-15 | 1.661E-14 | 2.654E-14 |
| 3 | 17 | 1.005E-41 | 2.072E-26  | 2.533E-17 | 2.288E-14 | 6.016E-13 | 1.686E-12 | 2.752E-12 |
| 3 | 18 | 3.194E-43 | 5.546E-27  | 2.432E-17 | 3.360E-14 | 1.091E-12 | 3.283E-12 | 5.550E-12 |
| 3 | 19 | 2.802E-45 | 1.137E-28  | 7.590E-19 | 1.204E-15 | 4.179E-14 | 1.281E-13 | 2.184E-13 |
| 3 | 21 | 0         | 1.233E-22  | 5.669E-18 | 1.555E-14 | 7.107E-13 | 2.393E-12 | 4.279E-12 |
| 3 | 23 | 0         | 1.939E-29  | 1.118E-18 | 3.642E-15 | 1.813E-13 | 6.281E-13 | 1.139E-12 |
| 3 | 24 | 0         | 2.192E-28  | 1.359E-17 | 4.535E-14 | 2.286E-12 | 7.952E-12 | 1.445E-11 |
| 3 | 25 | 0         | 2.192E-28  | 1.359E-17 | 4.535E-14 | 2.286E-12 | 7.952E-12 | 1.445E-11 |
| 3 | 26 | 0         | 1.314E-30  | 6.158E-19 | 4.027E-15 | 2.838E-13 | 1.102E-12 | 2.118E-12 |
| 3 | 27 | 0         | 1.238E-32  | 8.796E-21 | 6.582E-17 | 4.926E-15 | 1.942E-14 | 3.742E-14 |
| 4 | 6  | 9.492E-23 | 1.100E-17  | 9.833E-15 | 8.283E-14 | 2.161E-13 | 2.161E-13 | 3.148E-13 |
| 4 | 7  | 3.234E-26 | 3.680E-19  | 5.081E-15 | 1.050E-13 | 4.246E-13 | 6.407E-13 | 7.678E-13 |
| 4 | 8  | 6.253E-27 | 1.330E-19  | 2.667E-15 | 6.221E-14 | 2.659E-13 | 4.074E-13 | 4.910E-13 |
| 4 | 9  | 6.401E-27 | 5.509E-19  | 2.550E-14 | 7.860E-13 | 3.869E-12 | 6.232E-12 | 7.717E-12 |
| 4 | 12 | 1.106E-32 | 1.128E-21  | 3.620E-15 | 4.539E-13 | 4.473E-12 | 9.061E-12 | 1.258E-11 |
| 4 | 13 | 1.106E-32 | 1.128E-21  | 3.620E-15 | 4.539E-13 | 4.473E-12 | 9.061E-12 | 1.258E-11 |
| 4 | 14 | 2.047E-34 | 2.487E-23  | 8.861E-17 | 1.149E-14 | 1.151E-13 | 2.344E-13 | 3.260E-13 |
| 4 | 15 | 1.079E-36 | 4.314E-24  | 1.246E-16 | 3.243E-14 | 4.589E-13 | 1.047E-12 | 1.544E-12 |
| 4 | 16 | 6.539E-37 | 9.871E-24  | 6.328E-16 | 2.146E-13 | 3.466E-12 | 8.270E-12 | 1.246E-11 |
| 4 | 17 | 2.216E-39 | 5.061E-26  | 4.142E-18 | 1.512E-15 | 2.500E-14 | 5.948E-14 | 8.883E-14 |
| 4 | 18 | 4.674E-40 | 8.997E-26  | 2.653E-17 | 1.494E-14 | 3.106E-13 | 8.055E-13 | 1.265E-12 |
| 4 | 19 | 6.166E-41 | 2.394E-26  | 1.075E-17 | 6.966E-15 | 1.552E-13 | 4.119E-13 | 6.543E-13 |
| 4 | 21 | 1.775E-42 | 1.0619E-26 | 2.458E-17 | 2.746E-14 | 8.025E-13 | 2.329E-12 | 3.868E-12 |
| 4 | 23 | 1.597E-43 | 2.258E-27  | 8.757E-18 | 1.161E-14 | 3.698E-13 | 1.104E-12 | 1.860E-12 |
| 4 | 24 | 2.550E-43 | 4.064E-27  | 1.693E-17 | 2.301E-14 | 7.413E-13 | 2.222E-12 | 3.751E-12 |
| 4 | 25 | 2.592E-43 | 6.867E-27  | 3.887E-17 | 5.850E-14 | 1.983E-12 | 6.049E-12 | 1.029E-11 |
| 4 | 26 | 1.401E-45 | 7.581E-28  | 2.388E-17 | 6.362E-14 | 2.866E-12 | 9.608E-12 | 1.714E-11 |
| 4 | 27 | 0         | 3.083E-30  | 1.472E-19 | 4.494E-16 | 2.156E-14 | 7.351E-14 | 1.319E-13 |
| 5 | 7  | 9.406E-24 | 6.222E-18  | 1.571E-14 | 1.859E-13 | 1.859E-13 | 7.915E-13 | 9.077E-13 |
| 5 | 11 | 3.016E-27 | 2.823E-19  | 1.374E-14 | 4.302E-13 | 2.132E-12 | 3.440E-12 | 4.262E-12 |
| 5 | 14 | 1.241E-30 | 8.740E-21  | 5.651E-15 | 4.166E-13 | 3.156E-12 | 5.862E-12 | 7.794E-12 |
| 5 | 16 | 2.413E-34 | 2.110E-22  | 2.453E-15 | 4.717E-13 | 5.748E-12 | 1.249E-11 | 1.796E-11 |
| 5 | 23 | 1.426E-42 | 1.163E-27  | 8.108E-19 | 6.011E-16 | 1.405E-14 | 3.728E-14 | 5.859E-14 |
| 5 | 27 | 2.662E-43 | 1.439E-26  | 1.247E-16 | 2.163E-13 | 7.870E-12 | 2.457E-11 | 2.457E-11 |

**Table S25.** Rate coefficient (cm<sup>3</sup>/sec) for Ge-like Cd<sup>16+</sup> for the transitions from initial to final levels with respective indices '*i*' and '*f*' and electron temperature 1 – 40 eV.

| Transitions |          | 1         | 2         | 5         | 10        | 20        | 30        | 40        |
|-------------|----------|-----------|-----------|-----------|-----------|-----------|-----------|-----------|
| <i>i</i>    | <i>f</i> |           |           |           |           |           |           |           |
| 1           | 7        | 9.254E-31 | 1.827E-20 | 2.192E-14 | 1.958E-12 | 1.598E-11 | 2.990E-11 | 3.950E-11 |
| 1           | 11       | 1.832E-35 | 3.108E-23 | 5.339E-16 | 1.155E-13 | 1.460E-12 | 3.157E-12 | 4.480E-12 |

|   |    |           |           |           |           |           |           |           |
|---|----|-----------|-----------|-----------|-----------|-----------|-----------|-----------|
| 1 | 14 | 1.218E-38 | 1.592E-24 | 3.697E-16 | 1.899E-13 | 3.687E-12 | 9.190E-12 | 1.399E-11 |
| 1 | 16 | 7.174E-43 | 6.622E-27 | 3.342E-28 | 4.012E-25 | 1.189E-23 | 3.410E-23 | 5.571E-23 |
| 1 | 20 | 9.809E-45 | 3.356E-27 | 8.488E-17 | 2.075E-13 | 8.772E-12 | 2.831E-11 | 4.907E-11 |
| 1 | 23 | 0         | 1.621E-30 | 2.634E-19 | 1.196E-15 | 6.885E-14 | 2.462E-13 | 4.492E-13 |
| 1 | 27 | 0         | 1.049E-32 | 1.868E-20 | 1.882E-16 | 1.609E-14 | 6.560E-14 | 1.276E-13 |
| 2 | 6  | 2.176E-25 | 2.257E-18 | 2.936E-14 | 5.901E-13 | 2.313E-12 | 3.404E-12 | 3.991E-12 |
| 2 | 7  | 2.073E-30 | 1.885E-21 | 3.541E-16 | 1.699E-14 | 1.000E-13 | 1.653E-13 | 2.026E-13 |
| 2 | 8  | 7.885E-29 | 1.135E-19 | 2.822E-14 | 1.500E-12 | 9.478E-12 | 1.630E-11 | 2.066E-11 |
| 2 | 10 | 2.300E-32 | 1.063E-21 | 2.109E-15 | 2.230E-13 | 1.977E-12 | 3.804E-12 | 5.093E-12 |
| 2 | 11 | 2.115E-32 | 1.654E-21 | 4.498E-15 | 5.279E-13 | 4.929E-12 | 9.644E-12 | 1.302E-11 |
| 2 | 12 | 6.039E-35 | 7.449E-24 | 2.642E-17 | 3.345E-15 | 3.163E-14 | 6.080E-14 | 8.010E-14 |
| 2 | 13 | 1.456E-36 | 5.338E-24 | 1.455E-16 | 3.671E-14 | 5.008E-13 | 1.110E-12 | 1.594E-12 |
| 2 | 14 | 4.725E-36 | 2.845E-23 | 1.044E-15 | 2.906E-13 | 4.162E-12 | 9.377E-12 | 1.358E-11 |
| 2 | 15 | 5.828E-40 | 1.091E-25 | 3.143E-17 | 1.732E-14 | 3.478E-13 | 8.748E-13 | 1.337E-12 |
| 2 | 16 | 5.517E-40 | 2.346E-25 | 1.105E-16 | 7.182E-14 | 1.567E-12 | 4.062E-12 | 6.307E-12 |
| 2 | 18 | 6.811E-42 | 5.027E-26 | 1.311E-16 | 1.505E-13 | 4.365E-12 | 1.243E-11 | 2.024E-11 |
| 2 | 20 | 2.732E-43 | 4.100E-27 | 1.637E-17 | 2.166E-14 | 6.735E-13 | 1.962E-12 | 3.230E-12 |
| 2 | 21 | 1.261E-44 | 1.998E-27 | 3.177E-17 | 6.659E-14 | 2.605E-12 | 8.195E-12 | 1.402E-11 |
| 2 | 22 | 2.802E-45 | 4.832E-28 | 9.395E-18 | 2.104E-14 | 8.514E-13 | 2.707E-12 | 4.659E-12 |
| 2 | 23 | 1.401E-45 | 6.768E-28 | 1.736E-17 | 4.266E-14 | 1.807E-12 | 5.836E-12 | 1.011E-11 |
| 2 | 25 | 0         | 1.945E-28 | 6.982E-18 | 1.918E-14 | 8.589E-13 | 2.825E-12 | 4.943E-12 |
| 2 | 27 | 1.401E-45 | 3.412E-31 | 9.586E-20 | 5.219E-16 | 3.280E-14 | 1.206E-13 | 2.228E-13 |
| 3 | 6  | 8.968E-25 | 3.295E-18 | 2.305E-14 | 3.779E-13 | 1.341E-12 | 1.910E-12 | 2.203E-12 |
| 3 | 7  | 8.950E-29 | 2.875E-20 | 2.912E-15 | 1.150E-13 | 6.278E-13 | 1.029E-12 | 1.272E-12 |
| 3 | 8  | 1.310E-29 | 6.646E-21 | 8.832E-16 | 3.805E-14 | 2.153E-13 | 3.553E-13 | 4.391E-13 |
| 3 | 9  | 2.572E-29 | 4.475E-20 | 1.245E-14 | 6.874E-13 | 4.419E-12 | 7.643E-12 | 9.703E-12 |
| 3 | 11 | 9.990E-33 | 2.753E-22 | 4.006E-16 | 3.820E-14 | 3.214E-13 | 6.069E-13 | 8.046E-13 |
| 3 | 12 | 9.296E-32 | 4.052E-21 | 7.761E-15 | 8.111E-13 | 7.151E-12 | 1.372E-11 | 1.835E-11 |
| 3 | 13 | 1.267E-35 | 1.636E-23 | 2.386E-16 | 4.884E-14 | 5.998E-13 | 1.283E-12 | 1.809E-12 |
| 3 | 14 | 6.632E-35 | 1.407E-22 | 2.764E-15 | 6.252E-13 | 8.079E-12 | 1.759E-11 | 2.506E-11 |
| 3 | 15 | 3.471E-39 | 2.295E-25 | 3.771E-17 | 1.920E-14 | 4.512E-13 | 1.403E-12 | 4.071E-12 |
| 3 | 16 | 6.409E-41 | 9.592E-27 | 2.409E-18 | 1.265E-15 | 2.462E-14 | 6.096E-14 | 9.208E-14 |
| 3 | 17 | 7.239E-40 | 2.218E-25 | 8.587E-17 | 5.227E-14 | 1.103E-12 | 2.827E-12 | 4.365E-12 |
| 3 | 18 | 2.606E-41 | 6.776E-26 | 9.452E-17 | 8.814E-14 | 2.302E-12 | 6.332E-12 | 1.013E-11 |
| 3 | 20 | 2.844E-43 | 1.502E-27 | 3.205E-18 | 3.436E-15 | 9.592E-14 | 2.689E-13 | 4.335E-13 |
| 3 | 21 | 5.184E-44 | 2.773E-27 | 2.358E-17 | 4.013E-14 | 1.414E-12 | 4.297E-12 | 7.225E-12 |
| 3 | 23 | 2.802E-45 | 3.940E-28 | 5.406E-18 | 1.078E-14 | 4.115E-13 | 1.283E-12 | 2.186E-12 |
| 3 | 24 | 3.082E-44 | 4.175E-27 | 6.291E-17 | 1.295E-13 | 5.022E-12 | 1.575E-11 | 2.691E-11 |
| 3 | 25 | 1.401E-45 | 4.285E-28 | 8.227E-18 | 1.835E-14 | 7.406E-13 | 2.353E-12 | 4.047E-12 |
| 3 | 26 | 1.401E-45 | 3.017E-29 | 3.085E-18 | 1.201E-14 | 6.399E-13 | 2.230E-12 | 4.017E-12 |
| 3 | 27 | 2.802E-45 | 3.251E-31 | 4.871E-20 | 2.143E-16 | 1.202E-14 | 4.229E-14 | 7.611E-14 |
| 4 | 6  | 3.539E-22 | 2.462E-17 | 1.619E-14 | 1.227E-13 | 3.003E-13 | 3.798E-13 | 4.132E-13 |
| 4 | 7  | 1.761E-25 | 1.067E-18 | 1.006E-14 | 1.821E-13 | 6.782E-13 | 9.819E-13 | 1.141E-12 |
| 4 | 8  | 4.505E-26 | 4.309E-19 | 5.333E-15 | 1.052E-13 | 4.074E-13 | 5.952E-13 | 6.936E-13 |
| 4 | 9  | 6.671E-26 | 2.187E-18 | 5.658E-14 | 1.426E-12 | 6.248E-12 | 9.540E-12 | 1.139E-11 |
| 4 | 11 | 2.049E-30 | 1.060E-21 | 1.419E-16 | 6.075E-15 | 3.365E-14 | 5.425E-14 | 6.548E-14 |
| 4 | 12 | 9.561E-30 | 7.838E-21 | 1.388E-15 | 6.585E-14 | 3.911E-13 | 6.563E-13 | 8.186E-13 |
| 4 | 13 | 3.536E-31 | 1.158E-14 | 1.077E-12 | 8.971E-12 | 1.689E-11 | 2.238E-11 | 2.596E-11 |
| 4 | 14 | 2.211E-33 | 8.823E-23 | 1.602E-16 | 1.643E-14 | 1.433E-13 | 2.739E-13 | 3.652E-13 |
| 4 | 15 | 1.797E-35 | 2.176E-23 | 3.053E-16 | 6.175E-14 | 7.543E-13 | 1.611E-12 | 2.273E-12 |
| 4 | 16 | 3.372E-35 | 9.494E-23 | 2.209E-15 | 5.286E-13 | 7.024E-12 | 1.543E-11 | 2.208E-11 |
| 4 | 17 | 6.555E-38 | 3.768E-25 | 1.338E-17 | 3.655E-15 | 5.102E-14 | 1.123E-13 | 1.593E-13 |
| 4 | 18 | 1.430E-38 | 6.987E-25 | 8.993E-17 | 3.797E-14 | 6.689E-13 | 1.613E-12 | 2.418E-12 |
| 4 | 20 | 1.444E-39 | 1.436E-25 | 2.831E-17 | 1.377E-14 | 2.602E-13 | 6.426E-13 | 9.741E-13 |



|   |    |           |           |           |           |           |           |           |
|---|----|-----------|-----------|-----------|-----------|-----------|-----------|-----------|
| 4 | 21 | 1.339E-40 | 1.334E-25 | 1.046E-16 | 8.056E-14 | 1.912E-12 | 5.094E-12 | 8.020E-12 |
| 4 | 23 | 1.083E-41 | 2.394E-26 | 3.029E-17 | 2.734E-14 | 7.029E-13 | 1.922E-12 | 3.066E-12 |
| 4 | 24 | 1.780E-41 | 4.599E-26 | 6.390E-17 | 5.949E-14 | 1.553E-12 | 4.268E-12 | 6.827E-12 |
| 4 | 25 | 2.062E-41 | 7.977E-26 | 1.412E-16 | 1.425E-13 | 3.876E-12 | 1.080E-11 | 1.740E-11 |
| 4 | 26 | 1.597E-43 | 1.002E-26 | 9.448E-17 | 1.664E-13 | 5.971E-12 | 1.825E-11 | 3.079E-11 |
| 4 | 27 | 1.401E-45 | 4.766E-29 | 6.592E-19 | 1.314E-15 | 4.986E-14 | 1.544E-13 | 2.613E-13 |
| 5 | 7  | 4.007E-23 | 1.546E-17 | 2.821E-14 | 2.982E-13 | 8.573E-13 | 1.142E-12 | 1.277E-12 |
| 5 | 11 | 3.505E-26 | 1.155E-18 | 3.000E-14 | 7.567E-13 | 3.312E-12 | 5.051E-12 | 6.025E-12 |
| 5 | 14 | 1.605E-29 | 4.065E-20 | 1.417E-14 | 8.425E-13 | 5.623E-12 | 9.852E-12 | 1.259E-11 |
| 5 | 16 | 1.013E-32 | 1.811E-21 | 8.077E-15 | 1.117E-12 | 1.131E-11 | 2.272E-11 | 3.109E-11 |
| 5 | 20 | 4.196E-39 | 2.746E-26 | 1.050E-18 | 2.921E-16 | 4.065E-15 | 8.850E-15 | 1.238E-14 |
| 5 | 23 | 9.116E-41 | 1.273E-26 | 3.054E-18 | 1.565E-15 | 2.963E-14 | 7.167E-14 | 1.059E-13 |
| 5 | 27 | 2.422E-41 | 1.839E-25 | 4.877E-16 | 5.632E-13 | 1.637E-11 | 4.667E-11 | 7.604E-11 |
